# Supplementary material
Source: PubMed Central journal article supplement (PMC2777480)
Supplement: jn.109.114025_1.pdf [file jn.109.114025_1.pdf]

ARTICLES USED IN THE DEVELOPMENT OF THE INFLAMMATORY INDEX

1. Abbate, R., A.M. Gori, F. Martini, T. Brunelli, M. Filippini, I. Francalanci, R. Paniccia, D. Prisco, G.F. Gensini, and G.G. Neri Serneri, *n-3 PUFA supplementation, monocyte PCA expression and interleukin-6 production*. Prostaglandins Leukotrienes & Essential Fatty Acids, 1996. **54**(6): p. 439-44.
2. Abe, K., M. Ijiri, T. Suzuki, K. Taguchi, Y. Koyama, and M. Isemura, *Green tea with a high catechin content suppresses inflammatory cytokine expression in the galactosamine-injured rat liver*. Biomedical Research, 2005. **26**(5): p. 187-92.
3. Abe, Y., S. Hashimoto, and T. Horie, *Curcumin inhibition of inflammatory cytokine production by human peripheral blood monocytes and alveolar macrophages*. Pharmacological Research, 1999. **39**(1): p. 41-7.
4. Abraham, K., C. Muller, A. Gruters, U. Wahn, and F.J. Schweigert, *Minimal inflammation, acute phase response and avoidance of misclassification of vitamin A and iron status in infants--importance of a high-sensitivity C-reactive protein (CRP) assay*. International Journal for Vitamin & Nutrition Research, 2003. **73**(6): p. 423-30.
5. Abril, E.R., J.A. Rybski, P. Scuderi, and R.R. Watson, *Beta-carotene stimulates human leukocytes to secrete a novel cytokine*. Journal of Leukocyte Biology, 1989. **45**(3): p. 255-61.
6. Aeberli, I., R. Biebinger, R. Lehmann, D. L'Allemand, G.A. Spinass, and M.B. Zimmermann, *Serum retinol-binding protein 4 concentration and its ratio to serum retinol are associated with obesity and metabolic syndrome components in children*. J Clin Endocrinol Metab, 2007.
7. Aeberli, I., L. Molinari, G. Spinass, R. Lehmann, D. l'Allemand, and M.B. Zimmermann, *Dietary intakes of fat and antioxidant vitamins are predictors of subclinical inflammation in overweight Swiss children*. American Journal of Clinical Nutrition, 2006. **84**(4): p. 748-55.
8. Ahmad, N.S., B.A.K. Khalid, D.A. Luke, and S. Ima Nirwana, *Tocotrienol offers better protection than tocopherol from free radical-induced damage of rat bone*. Clinical & Experimental Pharmacology & Physiology, 2005. **32**(9): p. 761-70.
9. Ahmed, S., M.A. Satter, S. Yamamoto, K. Maeda, Y. Minato, and F. Ota, *Further evidence regarding the effect of dietary protein on oral tolerance against beta-lactoglobulin through Th1-mediated immune response in mice*. J Nutr Sci Vitaminol (Tokyo), 2003. **49**(2): p. 112-9.
10. Ahn, J., H. Lee, S. Kim, and T. Ha, *Resveratrol inhibits TNF-alpha-induced changes of adipokines in 3T3-L1 adipocytes*. Biochemical & Biophysical Research Communications, 2007. **364**(4): p. 972-7.
11. Ajani, U.A., E.S. Ford, and A.H. Mokdad, *Dietary fiber and C-reactive protein: findings from national health and nutrition examination survey data*. Journal of Nutrition, 2004. **134**(5): p. 1181-5.
12. Ajuwon, K.M. and M.E. Spurlock, *Palmitate activates the NF-kappaB transcription factor and induces IL-6 and TNFalpha expression in 3T3-L1 adipocytes*. Journal of Nutrition, 2005. **135**(8): p. 1841-6.

13. Alaoui El Azher, M., N. Havet, M. Singer, C. Dumarey, and L. Touqui, *Inhibition by unsaturated fatty acids of type II secretory phospholipase A2 synthesis in guinea-pig alveolar macrophages evidence for the eicosanoid-independent pathway*. European Journal of Biochemistry, 2000. **267**(12): p. 3633-9.
14. Al-Bader, A., A.E. Omu, and H. Dashti, *Chronic cadmium toxicity to sperm of heavy cigarette smokers: immunomodulation by zinc*. Archives of Andrology, 1999. **43**(2): p. 135-40.
15. Albers, R., M. Bol, R. Bleumink, A.A. Willems, and R.H.H. Pieters, *Effects of supplementation with vitamins A, C, and E, selenium, and zinc on immune function in a murine sensitization model*. Nutrition, 2003. **19**(11-12): p. 940-6.
16. Albert, M.A., R.J. Glynn, and P.M. Ridker, *Alcohol consumption and plasma concentration of C-reactive protein*. Circulation, 2003. **107**(3): p. 443-7.
17. Alestas, T., R. Ganceviciene, S. Fimmel, K. Muller-Decker, and C.C. Zouboulis, *Enzymes involved in the biosynthesis of leukotriene B4 and prostaglandin E2 are active in sebaceous glands*. J Mol Med, 2006. **84**(1): p. 75-87.
18. Alissa, E.M., W.H. Ahmed, N. Al-Ama, and G.A.A. Ferns, *Relationship between indices of iron status and coronary risk factors including diabetes and the metabolic syndrome in Saudi subjects without overt coronary disease*. Journal of Trace Elements in Medicine & Biology, 2007. **21**(4): p. 242-54.
19. Almeida, C.A. and A.M. Goes, *Human peripheral blood mononuclear cells stimulated by Schistosoma mansoni antigens: association between protein tyrosine kinases, mitogen-activated protein kinases and cytokine production*. Parasitology International, 2000. **48**(3): p. 255-64.
20. Almoznino-Sarafian, D., S. Berman, A. Mor, M. Shteinshnaider, O. Gorelik, I. Tzur, I. Alon, D. Modai, and N. Cohen, *Magnesium and C-reactive protein in heart failure: an anti-inflammatory effect of magnesium administration?* Eur J Nutr, 2007. **46**(4): p. 230-7.
21. Amarakoon, A.M., P.S. Tappia, and R.F. Grimble, *Endotoxin induced production of interleukin-6 is enhanced by vitamin E deficiency and reduced by black tea extract*. Inflammation Research, 1995. **44**(7): p. 301-5.
22. Andreou, V., M. D'Addario, R. Zohar, B. Sukhu, R.F. Casper, R.P. Ellen, and H.C. Tenenbaum, *Inhibition of osteogenesis in vitro by a cigarette smoke-associated hydrocarbon combined with Porphyromonas gingivalis lipopolysaccharide: reversal by resveratrol*. Journal of Periodontology, 2004. **75**(7): p. 939-48.
23. Anim-Nyame, N., S.R. Sooranna, M.R. Johnson, J. Gamble, and P.J. Steer, *Garlic supplementation increases peripheral blood flow: a role for interleukin-6?* Journal of Nutritional Biochemistry, 2004. **15**(1): p. 30-6.
24. Ansorge, S., D. Reinhold, and U. Lendeckel, *Propolis and some of its constituents down-regulate DNA synthesis and inflammatory cytokine production but induce TGF-beta1 production of human immune cells*. Zeitschrift fur Naturforschung Section C Journal of Biosciences, 2003. **58**(7-8): p. 580-9.
25. Antoniadis, C., D. Tousoulis, C. Tountas, C. Tentolouris, M. Toutouza, C. Vasiliadou, C. Tsioufis, P. Toutouzas, and C. Stefanadis, *Vascular endothelium and inflammatory process, in patients with combined Type 2 diabetes mellitus and coronary atherosclerosis: the effects of vitamin C*. Diabetic Medicine, 2004. **21**(6): p. 552-8.

26. Anwar, W., J.L. Gueant, I. Abdelmouttaleb, C. Adjalla, P. Gerard, G. Lemoel, N. Erraess, A. Moutabarrek, and F. Namour, *Hyperhomocysteinemia is related to residual glomerular filtration and folate, but not to methylenetetrahydrofolate-reductase and methionine synthase polymorphisms, in supplemented end-stage renal disease patients undergoing hemodialysis*. *Clinical Chemistry & Laboratory Medicine*, 2001. **39**(8): p. 747-52.
27. Arntzen, K.J., O.L. Brekke, L. Vatten, and R. Austgulen, *Reduced production of PGE2 and PGF2 alpha from decidual cell cultures supplemented with N-3 polyunsaturated fatty acids*. *Prostaglandins & Other Lipid Mediators*, 1998. **56**(2-3): p. 183-95.
28. Arrington, J.L., R.S. Chapkin, K.C. Switzer, J.S. Morris, and D.N. McMurray, *Dietary n-3 polyunsaturated fatty acids modulate purified murine T-cell subset activation*. *Clinical & Experimental Immunology*, 2001. **125**(3): p. 499-507.
29. Arroyo, C.M., R.K. Kan, D.L. Burman, D.W. Kahler, M.R. Nelson, C.M. Corun, J.J. Guzman, and C.A. Broomfield, *Regulation of 1-alpha, 25-dihydroxyvitamin D3 on interleukin-6 and interleukin-8 induced by sulfur mustard (HD) on human skin cells*. *Pharmacology & Toxicology*, 2003. **92**(5): p. 204-13.
30. Arya, S., S. Isharwal, A. Misra, R.M. Pandey, K. Rastogi, N.K. Vikram, V. Dhingra, A. Chatterjee, R. Sharma, and K. Luthra, *C-reactive protein and dietary nutrients in urban Asian Indian adolescents and young adults*. *Nutrition*, 2006. **22**(9): p. 865-71.
31. Asare, G.A., M. Bronz, V. Naidoo, and M.C. Kew, *Interactions between aflatoxin B1 and dietary iron overload in hepatic mutagenesis*. *Toxicology*, 2007. **234**(3): p. 157-66.
32. Asmis, R., J. Stevens, J.G. Begley, B. Grimes, G. Van Zant, and P. Fanti, *The isoflavone genistein inhibits LPS-stimulated TNFalpha, but not IL-6 expression in monocytes from hemodialysis patients and healthy subjects*. *Clinical Nephrology*, 2006. **65**(4): p. 267-75.
33. Aukrust, P., F. Muller, T. Ueland, A.M. Svardal, R.K. Berge, and S.S. Froland, *Decreased vitamin A levels in common variable immunodeficiency: vitamin A supplementation in vivo enhances immunoglobulin production and downregulates inflammatory responses*. *European Journal of Clinical Investigation*, 2000. **30**(3): p. 252-9.
34. Auvin, S., F. Collet, F. Gottrand, M.O. Husson, X. Leroy, C. Beermann, and B.P. Guery, *Long-chain polyunsaturated fatty acids modulate lung inflammatory response induced by Pseudomonas aeruginosa in mice*. *Pediatr Res*, 2005. **58**(2): p. 211-5.
35. Avellone, G., V. Di Garbo, D. Campisi, R. De Simone, G. Raneli, R. Scaglione, and G. Licata, *Effects of moderate Sicilian red wine consumption on inflammatory biomarkers of atherosclerosis*. *European Journal of Clinical Nutrition*, 2006. **60**(1): p. 41-7.
36. Averina, M., O. Nilssen, V.L. Arkhipovsky, A.G. Kalinin, and J. Brox, *C-reactive protein and alcohol consumption: Is there a U-shaped association? Results from a population-based study in Russia. The Arkhangelsk study*. *Atherosclerosis*, 2006. **188**(2): p. 309-15.
37. Avogaro, A., M. Sambataro, A. Marangoni, A. Pianta, R. Vettor, C. Pagano, M.C. Marescotti, A. Tiengo, and G. Beltramello, *Moderate alcohol consumption, glucose metabolism and lipolysis: the effect on adiponectin and tumor necrosis factor alpha*. *Journal of Endocrinological Investigation*, 2003. **26**(12): p. 1213-8.

38. Aydemir, T.B., R.K. Blanchard, and R.J. Cousins, *Zinc supplementation of young men alters metallothionein, zinc transporter, and cytokine gene expression in leukocyte populations*. Proceedings of the National Academy of Sciences of the United States of America, 2006. **103**(6): p. 1699-704.
39. Babcock, T.A., W.S. Helton, D. Hong, and N.J. Espat, *Omega-3 fatty acid lipid emulsion reduces LPS-stimulated macrophage TNF-alpha production*. Surgical Infections, 2002. **3**(2): p. 145-9.
40. Baek, O.-S., O.-H. Kang, Y.-A. Choi, S.-C. Choi, T.-H. Kim, Y.-H. Nah, D.-Y. Kwon, Y.-K. Kim, Y.-H. Kim, K.-H. Bae, et al., *Curcumin inhibits protease-activated receptor-2 and -4-mediated mast cell activation*. Clinica Chimica Acta, 2003. **338**(1-2): p. 135-41.
41. Baer, D.J., J.T. Judd, B.A. Clevidence, and R.P. Tracy, *Dietary fatty acids affect plasma markers of inflammation in healthy men fed controlled diets: a randomized crossover study*. American Journal of Clinical Nutrition, 2004. **79**(6): p. 969-73.
42. Baeten, J.M., R.S. McClelland, M.H. Wener, D.D. Bankson, L. Lavreys, K. Mandaliya, J.J. Bwayo, and J.K. Kreiss, *Relationship between markers of HIV-1 disease progression and serum beta-carotene concentrations in Kenyan women*. International Journal of STD & AIDS, 2007. **18**(3): p. 202-6.
43. Bagga, D., L. Wang, R. Farias-Eisner, J.A. Glaspy, and S.T. Reddy, *Differential effects of prostaglandin derived from omega-6 and omega-3 polyunsaturated fatty acids on COX-2 expression and IL-6 secretion*. Proc Natl Acad Sci U S A, 2003. **100**(4): p. 1751-6.
44. Bai, A.-P., Q. Ouyang, and R.-W. Hu, *Diallyl trisulfide inhibits tumor necrosis factor-alpha expression in inflamed mucosa of ulcerative colitis*. Digestive Diseases & Sciences, 2005. **50**(8): p. 1426-31.
45. Bai, S.-K., S.-J. Lee, H.-J. Na, K.-S. Ha, J.-A. Han, H. Lee, Y.-G. Kwon, C.-K. Chung, and Y.-M. Kim, *beta-Carotene inhibits inflammatory gene expression in lipopolysaccharide-stimulated macrophages by suppressing redox-based NF-kappaB activation*. Experimental & Molecular Medicine, 2005. **37**(4): p. 323-34.
46. Balint, E., C.F. Marshall, and S.M. Sprague, *Effect of the vitamin D analogues paricalcitol and calcitriol on bone mineral in vitro*. American Journal of Kidney Diseases, 2000. **36**(4): p. 789-96.
47. Banerjee, M., L.M. Tripathi, V.M.L. Srivastava, A. Puri, and R. Shukla, *Modulation of inflammatory mediators by ibuprofen and curcumin treatment during chronic inflammation in rat*. Immunopharmacology & Immunotoxicology, 2003. **25**(2): p. 213-24.
48. Bao, B., A. Prasad, F.W.J. Beck, A. Suneja, and F. Sarkar, *Toxic effect of zinc on NF-kappaB, IL-2, IL-2 receptor alpha, and TNF-alpha in HUT-78 (Th(0)) cells*. Toxicology Letters, 2006. **166**(3): p. 222-8.
49. Bao, B., A.S. Prasad, F.W.J. Beck, and M. Godmere, *Zinc modulates mRNA levels of cytokines*. American Journal of Physiology - Endocrinology & Metabolism, 2003. **285**(5): p. E1095-102.
50. Baolin, L., Y. Inami, H. Tanaka, N. Inagaki, M. Iinuma, and H. Nagai, *Resveratrol inhibits the release of mediators from bone marrow-derived mouse mast cells in vitro*. Planta Medica, 2004. **70**(4): p. 305-9.

51. Barber, M.D., K.C. Fearon, and J.A. Ross, *Eicosapentaenoic acid modulates the immune response but has no effect on a mimic of antigen-specific responses*. *Nutrition*, 2005. **21**(5): p. 588-93.
52. Barna, M., J.D. Bos, M.L. Kapsenberg, and F.G. Snijdwint, *Effect of calcitriol on the production of T-cell-derived cytokines in psoriasis*. *British Journal of Dermatology*, 1997. **136**(4): p. 536-41.
53. Bartels, L.E., S.P. Jorgensen, J. Agnholt, J. Kelsen, C.L. Hvas, and J.F. Dahlerup, *1,25-dihydroxyvitamin D3 and dexamethasone increase interleukin-10 production in CD4+ T cells from patients with Crohn's disease*. *International Immunopharmacology*, 2007. **7**(13): p. 1755-64.
54. Bassaganya-Riera, J. and R. Hontecillas, *CLA and n-3 PUFA differentially modulate clinical activity and colonic PPAR-responsive gene expression in a pig model of experimental IBD*. *Clinical Nutrition*, 2006. **25**(3): p. 454-65.
55. Beattie, J.H., M.-J. Gordon, M.D. Reid, G.J. Rucklidge, C.-S. Kwon, and I.-S. Kwun, *Hepatic responses to dietary stress in zinc- and metallothionein-deficient mice*. *Experimental Biology & Medicine*, 2006. **231**(9): p. 1542-7.
56. Beaty, C.D., T.L. Franklin, Y. Uehara, and C.B. Wilson, *Lipopolysaccharide-induced cytokine production in human monocytes: role of tyrosine phosphorylation in transmembrane signal transduction*. *European Journal of Immunology*, 1994. **24**(6): p. 1278-84.
57. Beck, F.W., A.S. Prasad, J. Kaplan, J.T. Fitzgerald, and G.J. Brewer, *Changes in cytokine production and T cell subpopulations in experimentally induced zinc-deficient humans*. *American Journal of Physiology*, 1997. **272**(6 Pt 1): p. E1002-7.
58. Beck, F.W.J., Y. Li, B. Bao, A.S. Prasad, and F.H. Sarkar, *Evidence for reprogramming global gene expression during zinc deficiency in the HUT-78 cell line*. *Nutrition*, 2006. **22**(10): p. 1045-56.
59. Bell, J.P., S.I. Mosfer, D. Lang, F. Donaldson, and M.J. Lewis, *Vitamin C and quinapril abrogate LVH and endothelial dysfunction in aortic-banded guinea pigs*. *American Journal of Physiology - Heart & Circulatory Physiology*, 2001. **281**(4): p. H1704-10.
60. Bellezzo, J.M., K.A. Leingang, G.A. Bulla, R.S. Britton, B.R. Bacon, and E.S. Fox, *Modulation of lipopolysaccharide-mediated activation in rat Kupffer cells by antioxidants*. *Journal of Laboratory & Clinical Medicine*, 1998. **131**(1): p. 36-44.
61. Bemiss, C.J., B.D. Mahon, A. Henry, V. Weaver, and M.T. Cantorna, *Interleukin-2 is one of the targets of 1,25-dihydroxyvitamin D3 in the immune system*. *Archives of Biochemistry & Biophysics*, 2002. **402**(2): p. 249-54.
62. Bergman, M., H. Bessler, H. Salman, D. Siomin, R. Strausberg, and M. Djaldetti, *In vitro cytokine production in patients with iron deficiency anemia*. *Clinical Immunology*, 2004. **113**(3): p. 340-4.
63. Bergman, M., H. Salman, M. Djaldetti, L. Fish, I. Punskey, and H. Bessler, *In vitro immune response of human peripheral blood cells to vitamins C and E*. *J Nutr Biochem*, 2004. **15**(1): p. 45-50.
64. Bermudez, E.A., N. Rifai, J. Buring, J.E. Manson, and P.M. Ridker, *Interrelationships among circulating interleukin-6, C-reactive protein, and traditional cardiovascular risk*

- factors in women.[see comment]. Arteriosclerosis, Thrombosis & Vascular Biology, 2002. 22(10): p. 1668-73.*
65. Bertran, N., J. Camps, J. Fernandez-Ballart, V. Arijia, N. Ferre, M. Tous, D. Simo, M.M. Murphy, E. Vilella, and J. Joven, *Diet and lifestyle are associated with serum C-reactive protein concentrations in a population-based study.* Journal of Laboratory & Clinical Medicine, 2005. **145**(1): p. 41-6.
  66. Bessler, H., G. Wyshelesky, M. Osovsky, V. Prober, and L. Sirota, *A comparison of the effect of vitamin A on cytokine secretion by mononuclear cells of preterm newborns and adults.* Neonatology, 2007. **91**(3): p. 196-202.
  67. Beulens, J.W., R. van den Berg, F.J. Kok, A. Helander, S.H. Vermunt, and H.F. Hendriks, *Moderate alcohol consumption and lipoprotein-associated phospholipase A2 activity.* Nutr Metab Cardiovasc Dis, 2007.
  68. Bhattacharyya, S., D. Mandal, G.S. Sen, S. Pal, S. Banerjee, L. Lahiry, J.H. Finke, C.S. Tannenbaum, T. Das, and G. Sa, *Tumor-induced oxidative stress perturbs nuclear factor-kappaB activity-augmenting tumor necrosis factor-alpha-mediated T-cell death: protection by curcumin.* Cancer Research, 2007. **67**(1): p. 362-70.
  69. Bi, X.L., J.Y. Yang, Y.X. Dong, J.M. Wang, Y.H. Cui, T. Ikeshima, Y.Q. Zhao, and C.F. Wu, *Resveratrol inhibits nitric oxide and TNF-alpha production by lipopolysaccharide-activated microglia.* International Immunopharmacology, 2005. **5**(1): p. 185-93.
  70. Biswas, S.K. and A. Sodhi, *In vitro activation of murine peritoneal macrophages by monocyte chemoattractant protein-1: upregulation of CD11b, production of proinflammatory cytokines, and the signal transduction pathway.* Journal of Interferon & Cytokine Research, 2002. **22**(5): p. 527-38.
  71. Blache, D., S. Devaux, O. Joubert, N. Loreau, M. Schneider, P. Durand, M. Prost, V. Gaume, M. Adrian, P. Laurant, et al., *Long-term moderate magnesium-deficient diet shows relationships between blood pressure, inflammation and oxidant stress defense in aging rats.* Free Radical Biology & Medicine, 2006. **41**(2): p. 277-84.
  72. Bleie, O., A.G. Semb, H. Grundt, J.E. Nordrehaug, S.E. Vollset, P.M. Ueland, D.W.T. Nilsen, A.M. Bakken, H. Refsum, and O.K. Nygard, *Homocysteine-lowering therapy does not affect inflammatory markers of atherosclerosis in patients with stable coronary artery disease.* Journal of Internal Medicine, 2007. **262**(2): p. 244-53.
  73. Blomhoff, H.K., E.B. Smeland, B. Erikstein, A.M. Rasmussen, B. Skrede, C. Skjonsberg, and R. Blomhoff, *Vitamin A is a key regulator for cell growth, cytokine production, and differentiation in normal B cells.* Journal of Biological Chemistry, 1992. **267**(33): p. 23988-92.
  74. Blonska, M., J. Bronikowska, G. Pietsz, Z.P. Czuba, S. Scheller, and W. Krol, *Effects of ethanol extract of propolis (EEP) and its flavones on inducible gene expression in J774A.1 macrophages.* Journal of Ethnopharmacology, 2004. **91**(1): p. 25-30.
  75. Blonska, M., Z.P. Czuba, and W. Krol, *Effect of flavone derivatives on interleukin-1beta (IL-1beta) mRNA expression and IL-1beta protein synthesis in stimulated RAW 264.7 macrophages.* Scandinavian Journal of Immunology, 2003. **57**(2): p. 162-6.
  76. Bo, S., G. Ciccone, M. Durazzo, R. Gambino, P. Massarenti, I. Baldi, A. Lezo, E. Tiozzo, D. Pauletto, M. Cassader, et al., *Efficacy of antioxidant treatment in reducing resistin serum levels: a randomized study.* PLoS Clin Trials, 2007. **2**(5): p. e17.

77. Bo, S., M. Durazzo, S. Guidi, M. Carello, C. Sacerdote, B. Silli, R. Rosato, M. Cassader, L. Gentile, and G. Pagano, *Dietary magnesium and fiber intakes and inflammatory and metabolic indicators in middle-aged subjects from a population-based cohort*. American Journal of Clinical Nutrition, 2006. **84**(5): p. 1062-9.
78. Bo, S., L. Gentile, G. Ciccone, C. Baldi, L. Benini, F. Dusio, C. Lucia, G. Forastiere, C. Nuti, M. Cassader, et al., *The metabolic syndrome and high C-reactive protein: prevalence and differences by sex in a southern-European population-based cohort*. Diabetes/Metabolism Research Reviews, 2005. **21**(6): p. 515-24.
79. Boekholdt, S.M., M.C. Meuwese, N.E. Day, R. Luben, A. Welch, N.J. Wareham, and K.T. Khaw, *Plasma concentrations of ascorbic acid and C-reactive protein, and risk of future coronary artery disease, in apparently healthy men and women: the EPIC-Norfolk prospective population study*. Br J Nutr, 2006. **96**(3): p. 516-22.
80. Bomalaski, J.S., T. Ford, A.P. Hudson, and M.A. Clark, *Phospholipase A2-activating protein induces the synthesis of IL-1 and TNF in human monocytes*. J Immunol, 1995. **154**(8): p. 4027-31.
81. Boosalis, M.G., D.A. Snowdon, C.L. Tully, and M.D. Gross, *Acute phase response and plasma carotenoid concentrations in older women: findings from the nun study*. Nutrition, 1996. **12**(7-8): p. 475-8.
82. Bordin, L., G. Priante, E. Musacchio, S. Giunco, E. Tibaldi, G. Clari, and B. Baggio, *Arachidonic acid-induced IL-6 expression is mediated by PKC alpha activation in osteoblastic cells*. Biochemistry, 2003. **42**(15): p. 4485-91.
83. Borger, P., H.F. Kauffman, D.S. Postma, and E. Vellenga, *IL-7 differentially modulates the expression of IFN-gamma and IL-4 in activated human T lymphocytes by transcriptional and post-transcriptional mechanisms*. Journal of Immunology, 1996. **156**(4): p. 1333-8.
84. Boscolo, P., A. del Signore, E. Sabbioni, M. Di Gioacchino, L. Di Giampaolo, M. Reale, P. Conti, R. Paganelli, and M. Giaccio, *Effects of resveratrol on lymphocyte proliferation and cytokine release*. Annals of Clinical & Laboratory Science, 2003. **33**(2): p. 226-31.
85. Boscolo, P., L. Di Giampaolo, N. Qiao, M. Reale, M.L. Castellani, I. Lucci, P. Travaglini, M. Kouri, N. Verna, A.R. Volpe, et al., *Inhibitory effects of cadmium on peripheral blood mononuclear cell proliferation and cytokine release are reversed by zinc and selenium salts*. Annals of Clinical & Laboratory Science, 2005. **35**(2): p. 115-20.
86. Bossola, M., M. Muscaritoli, L. Tazza, N. Panocchia, M. Liberatori, S. Giungi, A. Tortorelli, F. Rossi Fanelli, and G. Luciani, *Variables associated with reduced dietary intake in hemodialysis patients*. Journal of Renal Nutrition, 2005. **15**(2): p. 244-52.
87. Boutard, V., B. Fouqueray, C. Philippe, J. Perez, and L. Baud, *Fish oil supplementation and essential fatty acid deficiency reduce nitric oxide synthesis by rat macrophages*. Kidney International, 1994. **46**(5): p. 1280-6.
88. Braun, J., C. Dinkelacker, S. Bohnet, B. Kreft, and K. Dalhoff, *1,25-dihydroxycholecalciferol stimulates ICAM-1 expression of human alveolar macrophages in healthy controls and patients with sarcoidosis*. Lung, 1999. **177**(3): p. 139-49.
89. Bravo, E., M. Napolitano, I. Lopez-Soldado, M. Valeri, K.M. Botham, and C. Stefanutti, *Hypercholesterolaemia alters the responses of the plasma lipid profile and inflammatory*

- markers to supplementation of the diet with n-3 polyunsaturated fatty acids from fish oil. *European Journal of Clinical Investigation*, 2006. **36**(11): p. 788-95.
90. Breborowicz, M., A. Polubinska, P. Tam, G. Wu, and A. Breborowicz, *Effect of iron sucrose on human peritoneal mesothelial cells*. *European Journal of Clinical Investigation*, 2003. **33**(12): p. 1038-44.
  91. Brighenti, F., S. Valtuena, N. Pellegrini, D. Ardigo, D. Del Rio, S. Salvatore, P. Piatti, M. Serafini, and I. Zavaroni, *Total antioxidant capacity of the diet is inversely and independently related to plasma concentration of high-sensitivity C-reactive protein in adult Italian subjects*. *British Journal of Nutrition*, 2005. **93**(5): p. 619-25.
  92. Broekhuizen, R., E.F. Wouters, E.C. Creutzberg, C.A. Weling-Scheepers, and A.M. Schols, *Polyunsaturated fatty acids improve exercise capacity in chronic obstructive pulmonary disease*. *Thorax*, 2005. **60**(5): p. 376-82.
  93. Browning, L.M., J.D. Krebs, C.S. Moore, G.D. Mishra, M.A. O'Connell, and S.A. Jebb, *The impact of long chain n-3 polyunsaturated fatty acid supplementation on inflammation, insulin sensitivity and CVD risk in a group of overweight women with an inflammatory phenotype*. *Diabetes, Obesity & Metabolism*, 2007. **9**(1): p. 70-80.
  94. Bruck, R., H. Aeed, E. Brazovsky, T. Noor, and R. Hershkoviz, *Allicin, the active component of garlic, prevents immune-mediated, concanavalin A-induced hepatic injury in mice*. *Liver International*, 2005. **25**(3): p. 613-21.
  95. Bruck, R., M. Ashkenazi, S. Weiss, I. Goldiner, H. Shapiro, H. Aeed, O. Genina, Z. Helporn, and M. Pines, *Prevention of liver cirrhosis in rats by curcumin*. *Liver International*, 2007. **27**(3): p. 373-83.
  96. Bruunsgaard, H., H.E. Poulsen, B.K. Pedersen, K. Nyysönen, J. Kaikkonen, and J.T. Salonen, *Long-term combined supplementations with alpha-tocopherol and vitamin C have no detectable anti-inflammatory effects in healthy men*. *Journal of Nutrition*, 2003. **133**(4): p. 1170-3.
  97. Bujanda, L., M. Garcia-Barcina, V. Gutierrez-de Juan, J. Bidaurrazaga, M.F. de Luco, M. Gutierrez-Stampa, M. Larzabal, E. Hijona, C. Sarasqueta, M. Echenique-Elizondo, et al., *Effect of resveratrol on alcohol-induced mortality and liver lesions in mice*. *BMC Gastroenterology*, 2006. **6**: p. 35.
  98. Byrd, T.F., *Tumor necrosis factor alpha (TNFalpha) promotes growth of virulent Mycobacterium tuberculosis in human monocytes iron-mediated growth suppression is correlated with decreased release of TNFalpha from iron-treated infected monocytes*. *Journal of Clinical Investigation*, 1997. **99**(10): p. 2518-29.
  99. Cakman, I., J. Rohwer, R.M. Schutz, H. Kirchner, and L. Rink, *Dysregulation between TH1 and TH2 T cell subpopulations in the elderly*. *Mechanisms of Ageing & Development*, 1996. **87**(3): p. 197-209.
  100. Canning, M.O., K. Grotenhuis, H. de Wit, C. Ruwhof, and H.A. Drexhage, *1-alpha,25-Dihydroxyvitamin D3 (1,25(OH)(2)D(3)) hampers the maturation of fully active immature dendritic cells from monocytes*. *European Journal of Endocrinology*, 2001. **145**(3): p. 351-7.
  101. Cantorna, M.T., J. Humpal-Winter, and H.F. DeLuca, *Dietary calcium is a major factor in 1,25-dihydroxycholecalciferol suppression of experimental autoimmune encephalomyelitis in mice*. *Journal of Nutrition*, 1999. **129**(11): p. 1966-71.

102. Cao, H., M.A. Kelly, F. Kari, H.D. Dawson, J.F. Urban, Jr., S. Coves, A.M. Roussel, and R.A. Anderson, *Green tea increases anti-inflammatory tristetraproline and decreases pro-inflammatory tumor necrosis factor mRNA levels in rats*. *J Inflamm (Lond)*, 2007. **4**: p. 1.
103. Cappelli, P., L. Di Liberato, S. Stuard, E. Ballone, and A. Albertazzi, *N-3 polyunsaturated fatty acid supplementation in chronic progressive renal disease*. *Journal of Nephrology*, 1997. **10**(3): p. 157-62.
104. Carlier, C., M.S. Mourey, R. Luzeau, A. Ellrodt, D. Lemmonier, and O. Amedee-Manesme, *Assessment of vitamin A status in an elderly French population using impression cytology with transfer*. *International Journal for Vitamin & Nutrition Research*, 1989. **59**(1): p. 3-7.
105. Carr, B.R., N. Khan, B. Adams-Huet, N. Kakarla, J.C. Havelock, and J. Gell, *Effect of vitamin E supplementation with and without hormone therapy on circulatory inflammatory markers in postmenopausal women*. *Fertility & Sterility*, 2006. **85**(3): p. 667-73.
106. Carrero, J.J., J. Fonolla, J.L. Marti, J. Jimenez, J.J. Boza, and E. Lopez-Huertas, *Intake of fish oil, oleic acid, folic acid, and vitamins B-6 and E for 1 year decreases plasma C-reactive protein and reduces coronary heart disease risk factors in male patients in a cardiac rehabilitation program*. *Journal of Nutrition*, 2007. **137**(2): p. 384-90.
107. Carrier, J.C., E. Aghdassi, K. Jeejeebhoy, and J.P. Allard, *Exacerbation of dextran sulfate sodium-induced colitis by dietary iron supplementation: role of NF-kappaB*. *International Journal of Colorectal Disease*, 2006. **21**(4): p. 381-7.
108. Casper, R.F., M. Quesne, I.M. Rogers, T. Shirota, A. Jolivet, E. Milgrom, and J.F. Savouret, *Resveratrol has antagonist activity on the aryl hydrocarbon receptor: implications for prevention of dioxin toxicity*. *Molecular Pharmacology*, 1999. **56**(4): p. 784-90.
109. Castellanos, M., N. Puig, T. Carbonell, J. Castillo, J. Martinez, R. Rama, and A. Davalos, *Iron intake increases infarct volume after permanent middle cerebral artery occlusion in rats*. *Brain Research*, 2002. **952**(1): p. 1-6.
110. Cauwels, A., E. Wan, M. Leismann, and E. Tuomanen, *Coexistence of CD14-dependent and independent pathways for stimulation of human monocytes by gram-positive bacteria*. *Infection & Immunity*, 1997. **65**(8): p. 3255-60.
111. Chan, M.M., *Inhibition of tumor necrosis factor by curcumin, a phytochemical*. *Biochemical Pharmacology*, 1995. **49**(11): p. 1551-6.
112. Chan, M.M., D. Fong, K.J. Soprano, W.F. Holmes, and H. Heverling, *Inhibition of growth and sensitization to cisplatin-mediated killing of ovarian cancer cells by polyphenolic chemopreventive agents*. *Journal of Cellular Physiology*, 2003. **194**(1): p. 63-70.
113. Chang, C.P., J.Y. Chang, F.Y. Wang, and J.G. Chang, *The effect of Chinese medicinal herb Zingiberis rhizoma extract on cytokine secretion by human peripheral blood mononuclear cells*. *Journal of Ethnopharmacology*, 1995. **48**(1): p. 13-9.
114. Chang, C.-Y., J.-Y. Chen, D. Ke, and M.-L. Hu, *Plasma levels of lipophilic antioxidant vitamins in acute ischemic stroke patients: correlation to inflammation markers and neurological deficits*. *Nutrition*, 2005. **21**(10): p. 987-93.

115. Chang, H.-P., S.-Y. Huang, and Y.-H. Chen, *Modulation of cytokine secretion by garlic oil derivatives is associated with suppressed nitric oxide production in stimulated macrophages*. Journal of Agricultural & Food Chemistry, 2005. **53**(7): p. 2530-4.
116. Chang, T.-Y., K.-J. Chou, C.-F. Tseng, H.-M. Chung, H.-C. Fang, Y.-M. Hung, M.-J. Wu, H.-M. Tzeng, C.-C. Lind, and K.-C. Lu, *Effects of folic acid and vitamin B complex on serum C-reactive protein and albumin levels in stable hemodialysis patients*. Current Medical Research & Opinion, 2007. **23**(8): p. 1879-86.
117. Cheepsunthorn, P., L. Radov, S. Menzies, J. Reid, and J.R. Connor, *Characterization of a novel brain-derived microglial cell line isolated from neonatal rat brain*. GLIA, 2001. **35**(1): p. 53-62.
118. Chen, C.-Y., W.-H. Peng, K.-D. Tsai, and S.-L. Hsu, *Luteolin suppresses inflammation-associated gene expression by blocking NF-kappaB and AP-1 activation pathway in mouse alveolar macrophages*. Life Sciences, 2007. **81**(23-24): p. 1602-14.
119. Chen, F.-P., N. Lee, K.-C. Wang, Y.-K. Soong, and K.-E. Huang, *Effect of estrogen and 1 $\alpha$ ,25(OH) $_2$ -vitamin D $_3$  on the activity and growth of human primary osteoblast-like cells in vitro*. Fertility & Sterility, 2002. **77**(5): p. 1038-43.
120. Chen, H.-W., H.-T. Kuo, C.-Y. Chai, J.-L. Ou, and R.-C. Yang, *Pretreatment of curcumin attenuates coagulopathy and renal injury in LPS-induced endotoxemia*. Journal of Endotoxin Research, 2007. **13**(1): p. 15-23.
121. Chen, L., D.-D. Pan, J. Zhou, and Y.-Z. Jiang, *Protective effect of selenium-enriched Lactobacillus on CCl $_4$ -induced liver injury in mice and its possible mechanisms*. World Journal of Gastroenterology, 2005. **11**(37): p. 5795-800.
122. Chen, M.D., P.Y. Lin, and W.H. Sheu, *Zinc coadministration attenuates melatonin's effect on nitric oxide production in mice*. Biological Trace Element Research, 1999. **69**(3): p. 261-8.
123. Chen, W.-Q., Y.-Y. Cheng, X.-L. Zhao, S.-T. Li, Y. Hou, and Y. Hong, *Effects of zinc on the induction of metallothionein isoforms in hippocampus in stress rats*. Experimental Biology & Medicine, 2006. **231**(9): p. 1564-8.
124. Chen, X. and J.J. Anderson, *Isoflavones inhibit proliferation of ovarian cancer cells in vitro via an estrogen receptor-dependent pathway*. Nutrition & Cancer, 2001. **41**(1-2): p. 165-71.
125. Chen, X., S.C. Garner, L.D. Quarles, and J.J.B. Anderson, *Effects of genistein on expression of bone markers during MC3T3-E1 osteoblastic cell differentiation*. Journal of Nutritional Biochemistry, 2003. **14**(6): p. 342-9.
126. Chen, X.W., S.C. Garner, and J.J.B. Anderson, *Isoflavones regulate interleukin-6 and osteoprotegerin synthesis during osteoblast cell differentiation via an estrogen-receptor-dependent pathway*. Biochemical & Biophysical Research Communications, 2002. **295**(2): p. 417-22.
127. Chendil, D., R.S. Ranga, D. Meigooni, S. Sathishkumar, and M.M. Ahmed, *Curcumin confers radiosensitizing effect in prostate cancer cell line PC-3*. Oncogene, 2004. **23**(8): p. 1599-607.
128. Cheon, H., Y.-S. Woo, J.Y. Lee, H.S. Kim, H.J. Kim, S. Cho, N.H. Won, and J. Sohn, *Signaling pathway for 2,3,7,8-tetrachlorodibenzo-p-dioxin-induced TNF-alpha*

- production in differentiated THP-1 human macrophages*. Experimental & Molecular Medicine, 2007. **39**(4): p. 524-34.
129. Chiang, E.-P.I., P.J. Bagley, J. Selhub, M. Nadeau, and R. Roubenoff, *Abnormal vitamin B(6) status is associated with severity of symptoms in patients with rheumatoid arthritis*. American Journal of Medicine, 2003. **114**(4): p. 283-7.
130. Chiari, M.M., R. Bagnoli, P.D. De Luca, M. Monti, E. Rampoldi, and E. Cunietti, *Influence of acute inflammation on iron and nutritional status indexes in older inpatients*. Journal of the American Geriatrics Society, 1995. **43**(7): p. 767-71.
131. Cho, J.-W., K.-S. Lee, and C.-W. Kim, *Curcumin attenuates the expression of IL-1beta, IL-6, and TNF-alpha as well as cyclin E in TNF-alpha-treated HaCaT cells; NF-kappaB and MAPKs as potential upstream targets*. International Journal of Molecular Medicine, 2007. **19**(3): p. 469-74.
132. Cho, J.Y., P.S. Kim, J. Park, E.S. Yoo, K.U. Baik, Y.K. Kim, and M.H. Park, *Inhibitor of tumor necrosis factor-alpha production in lipopolysaccharide-stimulated RAW264.7 cells from Amorpha fruticosa*. Journal of Ethnopharmacology, 2000. **70**(2): p. 127-33.
133. Choi, E.-M., *Modulatory effects of luteolin on osteoblastic function and inflammatory mediators in osteoblastic MC3T3-E1 cells*. Cell Biology International, 2007. **31**(9): p. 870-7.
134. Chong, Y.H., J.H. Sung, S.A. Shin, J.H. Chung, and Y.H. Suh, *Effects of the beta-amyloid and carboxyl-terminal fragment of Alzheimer's amyloid precursor protein on the production of the tumor necrosis factor-alpha and matrix metalloproteinase-9 by human monocytic THP-1*. Journal of Biological Chemistry, 2001. **276**(26): p. 23511-7.
135. Chrysohoou, C., D.B. Panagiotakos, C. Pitsavos, J. Skoumas, M. Toutouza, I. Papaioannou, P.K. Toutouzas, and C. Stefanadis, *Effects of chronic alcohol consumption on lipid levels, inflammatory and haemostatic factors in the general population: the 'ATTICA' Study*. European Journal of Cardiovascular Prevention & Rehabilitation, 2003. **10**(5): p. 355-61.
136. Chrzan, B.G. and P.G. Bradford, *Phytoestrogens activate estrogen receptor beta1 and estrogenic responses in human breast and bone cancer cell lines*. Molecular Nutrition & Food Research, 2007. **51**(2): p. 171-7.
137. Chu, A.J., M.A. Walton, J.K. Prasad, and A. Seto, *Blockade by polyunsaturated n-3 fatty acids of endotoxin-induced monocytic tissue factor activation is mediated by the depressed receptor expression in THP-1 cells*. Journal of Surgical Research, 1999. **87**(2): p. 217-24.
138. Chung, H., D. Wu, S.N. Han, R. Gay, B. Goldin, R.E. Bronson, J.B. Mason, D.E. Smith, and S.N. Meydani, *Vitamin E supplementation does not alter azoxymethane-induced colonic aberrant crypt foci formation in young or old mice*. Journal of Nutrition, 2003. **133**(2): p. 528-32.
139. Cipollone, F., M. Fazio, A. Iezzi, B. Pini, F. Costantini, D. De Cesare, L. Paloscia, G. Materazzo, E. D'Annunzio, T. Bucciarelli, et al., *High preprocedural non-HDL cholesterol is associated with enhanced oxidative stress and monocyte activation after coronary angioplasty: possible implications in restenosis*. Heart, 2003. **89**(7): p. 773-9.

140. Cobanolu, N., U. Ozcelik, A. Gocmen, N. Kiper, and D. Doru, *Antioxidant effect of beta-carotene in cystic fibrosis and bronchiectasis: clinical and laboratory parameters of a pilot study*. Acta Paediatrica, 2002. **91**(7): p. 793-8.
141. Cohen, M.L., A. Douvdevani, C. Chaimovitz, and S. Shany, *Regulation of TNF-alpha by lalpha,25-dihydroxyvitamin D3 in human macrophages from CAPD patients*. Kidney Int, 2001. **59**(1): p. 69-75.
142. Colic, M. and M. Savic, *Garlic extracts stimulate proliferation of rat lymphocytes in vitro by increasing IL-2 and IL-4 production*. Immunopharmacol Immunotoxicol, 2000. **22**(1): p. 163-81.
143. Comalada, M., I. Ballester, E. Bailon, S. Sierra, J. Xaus, J. Galvez, F.S. de Medina, and A. Zarzuelo, *Inhibition of pro-inflammatory markers in primary bone marrow-derived mouse macrophages by naturally occurring flavonoids: analysis of the structure-activity relationship*. Biochemical Pharmacology, 2006. **72**(8): p. 1010-21.
144. Compher, C., M. Pazianas, S. Benedict, J.C. Brown, B.P. Kinosian, and M. Hise, *Systemic inflammatory mediators and bone homeostasis in intestinal failure*. Jpen: Journal of Parenteral & Enteral Nutrition, 2007. **31**(2): p. 142-7.
145. Cox, S.E., P. Arthur, B.R. Kirkwood, K. Yeboah-Antwi, and E.M. Riley, *Vitamin A supplementation increases ratios of proinflammatory to anti-inflammatory cytokine responses in pregnancy and lactation*. Clinical & Experimental Immunology, 2006. **144**(3): p. 392-400.
146. Craig, G.M., S.J. Evans, and B.J. Brayshaw, *An inverse relationship between serum zinc and C-reactive protein levels in acutely ill elderly hospital patients*. Postgraduate Medical Journal, 1990. **66**(782): p. 1025-8.
147. Crispen, P.L., R.G. Uzzo, K. Golovine, P. Makhov, A. Pollack, E.M. Horwitz, R.E. Greenberg, and V.M. Kolenko, *Vitamin E succinate inhibits NF-kappaB and prevents the development of a metastatic phenotype in prostate cancer cells: implications for chemoprevention*. Prostate, 2007. **67**(6): p. 582-90.
148. Csiszar, A., K. Smith, N. Labinskyy, Z. Orosz, A. Rivera, and Z. Ungvari, *Resveratrol attenuates TNF-alpha-induced activation of coronary arterial endothelial cells: role of NF-kappaB inhibition*. American Journal of Physiology - Heart & Circulatory Physiology, 2006. **291**(4): p. H1694-9.
149. Cui, D., Z. Moldoveanu, and C.B. Stephensen, *High-level dietary vitamin A enhances T-helper type 2 cytokine production and secretory immunoglobulin A response to influenza A virus infection in BALB/c mice*. Journal of Nutrition, 2000. **130**(5): p. 1132-9.
150. Curran, F.J., N. Sattar, D. Talwar, J.N. Baxter, and C.W. Imrie, *Relationship of carotenoid and vitamins A and E with the acute inflammatory response in acute pancreatitis*. British Journal of Surgery, 2000. **87**(3): p. 301-5.
151. Curtis, C.L., S.G. Rees, C.B. Little, C.R. Flannery, C.E. Hughes, C. Wilson, C.M. Dent, I.G. Otterness, J.L. Harwood, and B. Caterson, *Pathologic indicators of degradation and inflammation in human osteoarthritic cartilage are abrogated by exposure to n-3 fatty acids.[retraction in Caterson B. Arthritis Rheum. 2006 Sep;54(9):2933; PMID: 16948131]*. Arthritis & Rheumatism, 2002. **46**(6): p. 1544-53.

152. Cuschieri, J., E. Bulger, J. Biligren, I. Garcia, and R.V. Maier, *Vitamin E inhibits endotoxin-mediated transport of phosphatases to lipid rafts*. Shock, 2007. **27**(1): p. 19-24.
153. Cusick, S.E., J.M. Tielsch, M. Ramsan, J.K. Jape, S. Sazawal, R.E. Black, and R.J. Stoltzfus, *Short-term effects of vitamin A and antimalarial treatment on erythropoiesis in severely anemic Zanzibari preschool children*. American Journal of Clinical Nutrition, 2005. **82**(2): p. 406-12.
154. Dahle, M.K., G. Overland, A.E. Myhre, J.F. Stuestol, T. Hartung, C.D. Krohn, O. Mathiesen, J.E. Wang, and A.O. Aasen, *The phosphatidylinositol 3-kinase/protein kinase B signaling pathway is activated by lipoteichoic acid and plays a role in Kupffer cell production of interleukin-6 (IL-6) and IL-10*. Infection & Immunity, 2004. **72**(10): p. 5704-11.
155. Dai, J., C. Huang, J. Wu, C. Yang, K. Frenkel, and X. Huang, *Iron-induced interleukin-6 gene expression: possible mediation through the extracellular signal-regulated kinase and p38 mitogen-activated protein kinase pathways*. Toxicology, 2004. **203**(1-3): p. 199-209.
156. Dandona, P., P. Mohanty, H. Ghanim, A. Aljada, R. Browne, W. Hamouda, A. Prabhala, A. Afzal, and R. Garg, *The suppressive effect of dietary restriction and weight loss in the obese on the generation of reactive oxygen species by leukocytes, lipid peroxidation, and protein carbonylation*. Journal of Clinical Endocrinology & Metabolism, 2001. **86**(1): p. 355-62.
157. Daniel, C., T. Schlauch, U. Zugel, A. Steinmeyer, H.H. Radeke, D. Steinhilber, and J. Stein, *22-ene-25-oxa-vitamin D: a new vitamin D analogue with profound immunosuppressive capacities*. European Journal of Clinical Investigation, 2005. **35**(5): p. 343-9.
158. D'Anna, R., G. Baviera, F. Corrado, F. Cancellieri, A. Crisafulli, and F. Squadrito, *The effect of the phytoestrogen genistein and hormone replacement therapy on homocysteine and C-reactive protein level in postmenopausal women*. Acta Obstetrica et Gynecologica Scandinavica, 2005. **84**(5): p. 474-7.
159. Das, D., S. Mukherjee, A.S. Das, M. Mukherjee, and C. Mitra, *Aqueous extract of black tea (Camellia sinensis) prevents ethanol+cholecystokinin-induced pancreatitis in a rat model*. Life Sciences, 2006. **78**(19): p. 2194-203.
160. Das, M., A. Ram, and B. Ghosh, *Luteolin alleviates bronchoconstriction and airway hyperreactivity in ovalbumin sensitized mice*. Inflammation Research, 2003. **52**(3): p. 101-6.
161. Davis, J.M., E.A. Murphy, M.D. Carmichael, M.R. Zielinski, C.M. Groschwitz, A.S. Brown, J.D. Gangemi, A. Ghaffar, and E.P. Mayer, *Curcumin effects on inflammation and performance recovery following eccentric exercise-induced muscle damage*. American Journal of Physiology - Regulatory Integrative & Comparative Physiology, 2007. **292**(6): p. R2168-73.
162. Davis, S.R., E.P. Quinlivan, P.W. Stacpoole, and J.F. Gregory, 3rd, *Plasma glutathione and cystathionine concentrations are elevated but cysteine flux is unchanged by dietary vitamin B-6 restriction in young men and women*. Journal of Nutrition, 2006. **136**(2): p. 373-8.

163. De Bandt, M., M. Grossin, F. Driss, J. Pincemail, C. Babin-Chevaye, and C. Pasquier, *Vitamin E uncouples joint destruction and clinical inflammation in a transgenic mouse model of rheumatoid arthritis*. *Arthritis & Rheumatism*, 2002. **46**(2): p. 522-32.
164. De Caterina, R., M.A. Cybulsky, S.K. Clinton, M.A. Gimbrone, Jr., and P. Libby, *Omega-3 fatty acids and endothelial leukocyte adhesion molecules*. *Prostaglandins Leukotrienes & Essential Fatty Acids*, 1995. **52**(2-3): p. 191-5.
165. De Caterina, R., M.I. Cybulsky, S.K. Clinton, M.A. Gimbrone, Jr., and P. Libby, *The omega-3 fatty acid docosahexaenoate reduces cytokine-induced expression of proatherogenic and proinflammatory proteins in human endothelial cells*. *Arteriosclerosis & Thrombosis*, 1994. **14**(11): p. 1829-36.
166. De Haes, P., M. Garmyn, H. Degreef, K. Vantieghem, R. Bouillon, and S. Segaert, *1,25-Dihydroxyvitamin D3 inhibits ultraviolet B-induced apoptosis, Jun kinase activation, and interleukin-6 production in primary human keratinocytes*. *Journal of Cellular Biochemistry*, 2003. **89**(4): p. 663-73.
167. de Maat, M.P., H. Pijl, C. Klufft, and H.M. Princen, *Consumption of black and green tea had no effect on inflammation, haemostasis and endothelial markers in smoking healthy individuals*. *European Journal of Clinical Nutrition*, 2000. **54**(10): p. 757-63.
168. De Vos, N., C. Song, A.h. Lin, P. Demedts, A. Wauters, H. Neels, R. De Jongh, G. Kenis, E. Bosmans, C. Altamura, et al., *Lower serum zinc in relation to serum albumin and proinflammatory cytokines in detoxified alcohol-dependent patients without apparent liver disease*. *Neuropsychobiology*, 1999. **39**(3): p. 144-50.
169. Demiralay, R., N. Gursan, and H. Erdem, *Regulation of nicotine-induced apoptosis of pulmonary artery endothelial cells by treatment of N-acetylcysteine and vitamin E*. *Human & Experimental Toxicology*, 2007. **26**(7): p. 595-602.
170. Demiralay, R., N. Gursan, and H. Erdem, *The effects of erdosteine, N-acetylcysteine and vitamin E on nicotine-induced apoptosis of cardiac cells*. *Journal of Applied Toxicology*, 2007. **27**(3): p. 247-54.
171. Deodato, B., D. Altavilla, G. Squadrito, G.M. Campo, M. Arlotta, L. Minutoli, A. Saitta, D. Cucinotta, G. Calapai, A.P. Caputi, et al., *Cardioprotection by the phytoestrogen genistein in experimental myocardial ischaemia-reperfusion injury*. *British Journal of Pharmacology*, 1999. **128**(8): p. 1683-90.
172. Desroches, S., W.R. Archer, M.E. Paradis, O. Deriaz, P. Couture, J. Bergeron, N. Bergeron, and B. Lamarche, *Baseline plasma C-reactive protein concentrations influence lipid and lipoprotein responses to low-fat and high monounsaturated fatty acid diets in healthy men*. *J Nutr*, 2006. **136**(4): p. 1005-11.
173. Devaraj, S. and I. Jialal, *Alpha-tocopherol decreases interleukin-1 beta release from activated human monocytes by inhibition of 5-lipoxygenase*. *Arteriosclerosis, Thrombosis & Vascular Biology*, 1999. **19**(4): p. 1125-33.
174. Devaraj, S. and I. Jialal, *Alpha tocopherol supplementation decreases serum C-reactive protein and monocyte interleukin-6 levels in normal volunteers and type 2 diabetic patients*. *Free Radical Biology & Medicine*, 2000. **29**(8): p. 790-2.
175. Devaraj, S. and I. Jialal, *Low-density lipoprotein postsecretory modification, monocyte function, and circulating adhesion molecules in type 2 diabetic patients with and without*

- macrovascular complications: the effect of alpha-tocopherol supplementation.* Circulation, 2000. **102**(2): p. 191-6.
176. Devaraj, S. and I. Jialal, *Alpha-tocopherol decreases tumor necrosis factor-alpha mRNA and protein from activated human monocytes by inhibition of 5-lipoxygenase.* Free Radical Biology & Medicine, 2005. **38**(9): p. 1212-20.
177. Devaraj, S., R. Tang, B. Adams-Huet, A. Harris, T. Seenivasan, J.A. de Lemos, and I. Jialal, *Effect of high-dose alpha-tocopherol supplementation on biomarkers of oxidative stress and inflammation and carotid atherosclerosis in patients with coronary artery disease.* American Journal of Clinical Nutrition, 2007. **86**(5): p. 1392-8.
178. Deyhim, F., C. Gonzales, C. Garcia, A. Villarreal, K. Garcia, R. Rios, K. Mandadi, and B.S. Patil, *Vitamin E does not modulate plasma lipid profile or C-reactive protein despite suppressing oxidative stress in orchietomized rats.* J Med Food, 2007. **10**(3): p. 559-62.
179. Diaz, V.A., A.G. Mainous, 3rd, R.J. Koopman, P.J. Carek, and M.E. Geesey, *Race and diet in the overweight: association with cardiovascular risk in a nationally representative sample.* Nutrition, 2005. **21**(6): p. 718-25.
180. Dijsselbloem, N., S. Goriely, V. Albarani, S. Gerlo, S. Francoz, J.-C. Marine, M. Goldman, G. Haegeman, and W. Vanden Berghe, *A critical role for p53 in the control of NF-kappaB-dependent gene expression in TLR4-stimulated dendritic cells exposed to Genistein.* Journal of Immunology, 2007. **178**(8): p. 5048-57.
181. Ding, M., R. Feng, S.Y. Wang, L. Bowman, Y. Lu, Y. Qian, V. Castranova, B.-H. Jiang, and X. Shi, *Cyanidin-3-glucoside, a natural product derived from blackberry, exhibits chemopreventive and chemotherapeutic activity.* Journal of Biological Chemistry, 2006. **281**(25): p. 17359-68.
182. Ding, S.Z., C.H. Cho, and S.K. Lam, *Regulation of interleukin 6 production in a human gastric epithelial cell line MKN-28.* Cytokine, 2000. **12**(7): p. 1129-35.
183. Dixon, J.S., N.G. Sitton, K.E. Surrall, M.F. Martin, M.E. Pickup, and H.A. Bird, *The effect of drugs on serum histidine levels in rheumatoid arthritis.* Rheumatology International, 1983. **3**(4): p. 145-9.
184. Djurovic, S., K.E. Berge, B. Birkenes, O. Braaten, and L. Retterstol, *The effect of red wine on plasma leptin levels and vasoactive factors from adipose tissue: a randomized crossover trial.* Alcohol & Alcoholism, 2007. **42**(6): p. 525-8.
185. Dogan, A., Y. Tunca, A. Ozdemir, A. Sengul, and N. Imirzalioglu, *The effects of folic acid application on IL-1beta levels of human gingival fibroblasts stimulated by phenytoin and TNFalpha in vitro: a preliminary study.* J Oral Sci, 2001. **43**(4): p. 255-60.
186. Doke, S., N. Inagaki, T. Hayakawa, and H. Tsuge, *Effect of vitamin B6 deficiency on an antibody production in mice.* Bioscience, Biotechnology & Biochemistry, 1997. **61**(8): p. 1331-6.
187. Dooper, M.M.B.W., B. van Riel, Y.M.F. Graus, and L. M'Rabet, *Dihomo-gamma-linolenic acid inhibits tumour necrosis factor-alpha production by human leucocytes independently of cyclooxygenase activity.* Immunology, 2003. **110**(3): p. 348-57.
188. Driessen, C., K. Hirv, L. Rink, and H. Kirchner, *Induction of cytokines by zinc ions in human peripheral blood mononuclear cells and separated monocytes.* Lymphokine & Cytokine Research, 1994. **13**(1): p. 15-20.

189. Droke, E.A., T.S. Kennedy, and L. Hubbs-Tait, *Potential for misclassification of micronutrient status in children participating in a Head Start program*. J Am Diet Assoc, 2006. **106**(3): p. 376-82.
190. Du, J.-H., T.-J. Guan, H. Zhang, H. Xiao, Q.-D. Han, and Y.-Y. Zhang, *Phenylarsine oxide inhibited beta-adrenergic receptor-mediated IL-6 secretion: inhibition of cAMP accumulation and CREB activation in cardiac fibroblasts*. Biochemical & Biophysical Research Communications, 2007. **352**(3): p. 744-9.
191. Due, A., S. Toubro, S. Stender, A.R. Skov, and A. Astrup, *The effect of diets high in protein or carbohydrate on inflammatory markers in overweight subjects*. Diabetes, Obesity & Metabolism, 2005. **7**(3): p. 223-9.
192. Duggan, C., A.A. Colin, A. Agil, L. Higgins, and N. Rifai, *Vitamin A status in acute exacerbations of cystic fibrosis*. American Journal of Clinical Nutrition, 1996. **64**(4): p. 635-9.
193. Dunstan, J.A., L. Breckler, J. Hale, H. Lehmann, P. Franklin, G. Lyonso, S.Y.L. Ching, T.A. Mori, A. Barden, and S.L. Prescott, *Associations between antioxidant status, markers of oxidative stress and immune responses in allergic adults*. Clinical & Experimental Allergy, 2006. **36**(8): p. 993-1000.
194. Dupasquier, C.M.C., E. Dibrov, A.L. Kneesh, P.K.M. Cheung, K.G.Y. Lee, H.K. Alexander, B.K. Yeganeh, M.H. Moghadasian, and G.N. Pierce, *Dietary flaxseed inhibits atherosclerosis in the LDL receptor-deficient mouse in part through antiproliferative and anti-inflammatory actions*. American Journal of Physiology - Heart & Circulatory Physiology, 2007. **293**(4): p. H2394-402.
195. Durga, J., L.J.H. van Tits, E.G. Schouten, F.J. Kok, and P. Verhoef, *Effect of lowering of homocysteine levels on inflammatory markers: a randomized controlled trial*. Archives of Internal Medicine, 2005. **165**(12): p. 1388-94.
196. Eicher, S.D., C.A. McKee, J.A. Carroll, and E.A. Pajor, *Supplemental vitamin C and yeast cell wall beta-glucan as growth enhancers in newborn pigs and as immunomodulators after an endotoxin challenge after weaning*. Journal of Animal Science, 2006. **84**(9): p. 2352-60.
197. Eley, B.S., A.A. Sive, L. Abelse, G. Kossew, M. Cooper, and G.D. Hussey, *Growth and micronutrient disturbances in stable, HIV-infected children in Cape Town*. Annals of Tropical Paediatrics, 2002. **22**(1): p. 19-23.
198. Elmegeed, G.A., H.H. Ahmed, and J.S. Hussein, *Novel synthesized aminosteroidal heterocycles intervention for inhibiting iron-induced oxidative stress*. European Journal of Medicinal Chemistry, 2005. **40**(12): p. 1283-94.
199. El-Taukhy, M.A., S.M. Salama, S.A. Abou-Shousha, S.S. Ismail, and M. Saleh, *Effects of chronic ethanol and vitamin C administration on production of tumor necrosis factor-alpha and interleukin-6 in rats*. Egypt J Immunol, 2006. **13**(1): p. 1-10.
200. Engler, M.M., M.B. Engler, M. Malloy, E. Chiu, D. Besio, S. Paul, M. Stuehlinger, J. Morrow, P. Ridker, N. Rifai, et al., *Docosahexaenoic acid restores endothelial function in children with hyperlipidemia: results from the EARLY study*. International Journal of Clinical Pharmacology & Therapeutics, 2004. **42**(12): p. 672-9.
201. Engler, M.M., M.B. Engler, M.J. Malloy, E.Y. Chiu, M.C. Schloetter, S.M. Paul, M. Stuehlinger, K.Y. Lin, J.P. Cooke, J.D. Morrow, et al., *Antioxidant vitamins C and E*

- improve endothelial function in children with hyperlipidemia: Endothelial Assessment of Risk from Lipids in Youth (EARLY) Trial.* *Circulation*, 2003. **108**(9): p. 1059-63.
202. Englund Ogge, L., G. Brohall, C.J. Behre, C. Schmidt, and B. Fagerberg, *Alcohol consumption in relation to metabolic regulation, inflammation, and adiponectin in 64-year-old Caucasian women: a population-based study with a focus on impaired glucose regulation.* *Diabetes Care*, 2006. **29**(4): p. 908-13.
203. Equils, O., Y. Naiki, A.M. Shapiro, K. Michelsen, D. Lu, J. Adams, and S. Jordan, *1,25-Dihydroxyvitamin D inhibits lipopolysaccharide-induced immune activation in human endothelial cells.* *Clin Exp Immunol*, 2006. **143**(1): p. 58-64.
204. Erichsen, K., R.J. Ulvik, G. Nysaeter, J. Johansen, J. Ostborg, A. Berstad, R.K. Berge, and T. Hausken, *Oral ferrous fumarate or intravenous iron sucrose for patients with inflammatory bowel disease.* *Scandinavian Journal of Gastroenterology*, 2005. **40**(9): p. 1058-65.
205. Eritsland, J., I. Seljeflot, H. Arnesen, A.B. Westvik, and P. Kierulf, *Effect of long-term, moderate-dose supplementation with omega-3 fatty acids on monocyte procoagulant activity and release of interleukin-6 in patients with coronary artery disease.* *Thrombosis Research*, 1995. **77**(4): p. 337-46.
206. Erlinger, T.P., E. Guallar, E.R. Miller, 3rd, R. Stolzenberg-Solomon, and L.J. Appel, *Relationship between systemic markers of inflammation and serum beta-carotene levels.* *Archives of Internal Medicine*, 2001. **161**(15): p. 1903-8.
207. Espirito Santo, S.M.S., B.J.M. van Vlijmen, W. van Duyvenvoorde, E.H. Offerman, L.M. Havekes, I. Arnault, J. Auger, and H.M.G. Princen, *Absence of an atheroprotective effect of the garlic powder printanor in APOE\*3-Leiden transgenic mice.* *Atherosclerosis*, 2004. **177**(2): p. 291-7.
208. Esposito, K., M. Ciotola, F.C. Sasso, D. Cozzolino, F. Saccomanno, R. Assaloni, A. Ceriello, and D. Giugliano, *Effect of a single high-fat meal on endothelial function in patients with the metabolic syndrome: role of tumor necrosis factor-alpha.* *Nutrition Metabolism & Cardiovascular Diseases*, 2007. **17**(4): p. 274-9.
209. Estruch, R., E. Sacanella, E. Badia, E. Antunez, J.M. Nicolas, J. Fernandez-Sola, D. Rotilio, G. de Gaetano, E. Rubin, and A. Urbano-Marquez, *Different effects of red wine and gin consumption on inflammatory biomarkers of atherosclerosis: a prospective randomized crossover trial. Effects of wine on inflammatory markers.* *Atherosclerosis*, 2004. **175**(1): p. 117-23.
210. Evans, K.N., L. Nguyen, J. Chan, B.A. Innes, J.N. Bulmer, M.D. Kilby, and M. Hewison, *Effects of 25-hydroxyvitamin D3 and 1,25-dihydroxyvitamin D3 on cytokine production by human decidual cells.* *Biology of Reproduction*, 2006. **75**(6): p. 816-22.
211. Fahey, A.J., R. Adrian Robins, and C.S. Constantinescu, *Curcumin modulation of IFN-beta and IL-12 signalling and cytokine induction in human T cells.* *Journal of Cellular & Molecular Medicine*, 2007. **11**(5): p. 1129-37.
212. Feng, N.-H., S.-J. Chu, D. Wang, K. Hsu, C.-H. Lin, and H.-I. Lin, *Effects of various antioxidants on endotoxin-induced lung injury and gene expression: mRNA expressions of MnSOD, interleukin-1beta and iNOS.* *Chinese Journal of Physiology*, 2004. **47**(3): p. 111-20.

213. Feng, Y.-H., Y.-N. Zhu, J. Liu, Y.-X. Ren, J.-Y. Xu, Y.-F. Yang, X.-Y. Li, and J.-P. Zou, *Differential regulation of resveratrol on lipopolysaccharide-stimulated human macrophages with or without IFN-gamma pre-priming*. International Immunopharmacology, 2004. **4**(6): p. 713-20.
214. Fernandes, G., B. Chandrasekar, D.A. Troyer, J.T. Venkatraman, and R.A. Good, *Dietary lipids and calorie restriction affect mammary tumor incidence and gene expression in mouse mammary tumor virus/v-Ha-ras transgenic mice*. Proceedings of the National Academy of Sciences of the United States of America, 1995. **92**(14): p. 6494-8.
215. Fernandez-Real, J.M., M. Broch, J. Vendrell, and W. Ricart, *Insulin resistance, inflammation, and serum fatty acid composition*. Diabetes Care, 2003. **26**(5): p. 1362-8.
216. Ferrante, J.V., Z.H. Huang, M. Nandoskar, C.S. Hii, B.S. Robinson, D.A. Rathjen, A. Poulos, C.P. Morris, and A. Ferrante, *Altered responses of human macrophages to lipopolysaccharide by hydroperoxy eicosatetraenoic acid, hydroxy eicosatetraenoic acid, and arachidonic acid. Inhibition of tumor necrosis factor production*. J Clin Invest, 1997. **99**(6): p. 1445-52.
217. Ferrucci, L., A. Cherubini, S. Bandinelli, B. Bartali, A. Corsi, F. Lauretani, A. Martin, C. Andres-Lacueva, U. Senin, and J.M. Guralnik, *Relationship of plasma polyunsaturated fatty acids to circulating inflammatory markers*. J Clin Endocrinol Metab, 2006. **91**(2): p. 439-46.
218. Field, C.J., A. Van Aerde, K.L. Drager, S. Goruk, and T. Basu, *Dietary folate improves age-related decreases in lymphocyte function*. Journal of Nutritional Biochemistry, 2006. **17**(1): p. 37-44.
219. Filteau, S.M., S.S. Morris, J.G. Raynes, P. Arthur, D.A. Ross, B.R. Kirkwood, A.M. Tomkins, and J.O. Gyapong, *Vitamin A supplementation, morbidity, and serum acute-phase proteins in young Ghanaian children*. American Journal of Clinical Nutrition, 1995. **62**(2): p. 434-8.
220. Finamore, A., C. Devirgiliis, D. Panno, M. D'Aquino, A. Polito, E. Venneria, A. Raguzzini, C. Coudray, and E. Mengheri, *Immune response in relation to zinc status, sex and antioxidant defence in Italian elderly population: the ZENITH study*. European Journal of Clinical Nutrition, 2005. **59 Suppl 2**: p. S68-72.
221. Fischer, C.P., N.J. Hiscock, M. Penkowa, S. Basu, B. Vessby, A. Kallner, L.-B. Sjoberg, and B.K. Pedersen, *Supplementation with vitamins C and E inhibits the release of interleukin-6 from contracting human skeletal muscle*. Journal of Physiology, 2004. **558**(Pt 2): p. 633-45.
222. Flanagan, A.M., J.L. Brown, C.A. Santiago, P.Y. Aad, L.J. Spicer, and M.T. Spicer, *High-fat diets promote insulin resistance through cytokine gene expression in growing female rats*. J Nutr Biochem, 2007.
223. Flanary, B.E. and W.J. Streit, *Alpha-tocopherol (vitamin E) induces rapid, nonsustained proliferation in cultured rat microglia*. GLIA, 2006. **53**(6): p. 669-74.
224. Flanigen-Roat, D.T., R.J. Milholland, and M.M. Ip, *Effect of a high-protein-low-carbohydrate diet on toxicity and antitumor activity of 5-fluorouracil in mice*. J Natl Cancer Inst, 1985. **74**(3): p. 705-10.

225. Fleet, J.C., S.K. Clinton, R.N. Salomon, H. Loppnow, and P. Libby, *Atherogenic diets enhance endotoxin-stimulated interleukin-1 and tumor necrosis factor gene expression in rabbit aortae*. Journal of Nutrition, 1992. **122**(2): p. 294-305.
226. Folsom, A.R., M. Desvarieux, F.J. Nieto, L.L. Boland, C.M. Ballantyne, and L.E. Chambless, *B vitamin status and inflammatory markers*. Atherosclerosis, 2003. **169**(1): p. 169-74.
227. Fonseca, D. and W.E. Ward, *Daidzein together with high calcium preserve bone mass and biomechanical strength at multiple sites in ovariectomized mice*. Bone, 2004. **35**(2): p. 489-97.
228. Fontana, L., D.T. Villareal, E.P. Weiss, S.B. Racette, K. Steger-May, S. Klein, and J.O. Holloszy, *Calorie restriction or exercise: effects on coronary heart disease risk factors. A randomized, controlled trial*. Am J Physiol Endocrinol Metab, 2007. **293**(1): p. E197-202.
229. Ford, E.S., C. Gillespie, C. Ballew, A. Sowell, and D.M. Mannino, *Serum carotenoid concentrations in US children and adolescents*. American Journal of Clinical Nutrition, 2002. **76**(4): p. 818-27.
230. Ford, E.S., S. Liu, D.M. Mannino, W.H. Giles, and S.J. Smith, *C-reactive protein concentration and concentrations of blood vitamins, carotenoids, and selenium among United States adults*. European Journal of Clinical Nutrition, 2003. **57**(9): p. 1157-63.
231. Foreback, J.L., V. Sarma, N.R. Yeager, E.M. Younkin, D.G. Remick, and P.A. Ward, *Blood mononuclear cell production of TNF-alpha and IL-8: engagement of different signal transduction pathways including the p42 MAP kinase pathway*. Journal of Leukocyte Biology, 1998. **64**(1): p. 124-33.
232. Foster, S.L., S.H. Richardson, and M.L. Failla, *Elevated iron status increases bacterial invasion and survival and alters cytokine/chemokine mRNA expression in Caco-2 human intestinal cells*. Journal of Nutrition, 2001. **131**(5): p. 1452-8.
233. Frank, J., A. Flaccus, C. Schwarz, C. Lambert, and H.K. Biesalski, *Ascorbic acid suppresses cell death in rat DS-sarcoma cancer cells induced by 5-aminolevulinic acid-based photodynamic therapy*. Free Radical Biology & Medicine, 2006. **40**(5): p. 827-36.
234. Frankenburg, S., X. Wang, and Y. Milner, *Vitamin A inhibits cytokines produced by type 1 lymphocytes in vitro*. Cellular Immunology, 1998. **185**(1): p. 75-81.
235. Fredrikson, G.N., B. Hedblad, J.-A. Nilsson, R. Alm, G. Berglund, and J. Nilsson, *Association between diet, lifestyle, metabolic cardiovascular risk factors, and plasma C-reactive protein levels.[see comment]*. Metabolism: Clinical & Experimental, 2004. **53**(11): p. 1436-42.
236. Freedman, S.D., D. Weinstein, P.G. Blanco, P. Martinez-Clark, S. Urman, M. Zaman, J.D. Morrow, and J.G. Alvarez, *Characterization of LPS-induced lung inflammation in cfr-/- mice and the effect of docosahexaenoic acid*. Journal of Applied Physiology, 2002. **92**(5): p. 2169-76.
237. Friedman, A.N., L.G. Hunsicker, J. Selhub, and A.G. Bostom, *Clinical and nutritional correlates of C-reactive protein in type 2 diabetic nephropathy*. Atherosclerosis, 2004. **172**(1): p. 121-5.

238. Friso, S., D. Girelli, N. Martinelli, O. Olivieri, V. Lotto, C. Bozzini, F. Pizzolo, G. Faccini, F. Beltrame, and R. Corrocher, *Low plasma vitamin B-6 concentrations and modulation of coronary artery disease risk*. *Am J Clin Nutr*, 2004. **79**(6): p. 992-8.
239. Friso, S., P.F. Jacques, P.W. Wilson, I.H. Rosenberg, and J. Selhub, *Low circulating vitamin B(6) is associated with elevation of the inflammation marker C-reactive protein independently of plasma homocysteine levels*. *Circulation*, 2001. **103**(23): p. 2788-91.
240. Fritsche, K.L., M. Anderson, and C. Feng, *Consumption of eicosapentaenoic acid and docosahexaenoic acid impair murine interleukin-12 and interferon-gamma production in vivo*. *Journal of Infectious Diseases*, 2000. **182 Suppl 1**: p. S54-61.
241. Frondoza, C.G., A. Sohrabi, A. Polotsky, P.V. Phan, D.S. Hungerford, and L. Lindmark, *An in vitro screening assay for inhibitors of proinflammatory mediators in herbal extracts using human synoviocyte cultures*. *In Vitro Cellular & Developmental Biology Animal*, 2004. **40**(3-4): p. 95-101.
242. Fujioka, S., K. Hamazaki, M. Itomura, M. Huan, H. Nishizawa, S. Sawazaki, I. Kitajima, and T. Hamazaki, *The effects of eicosapentaenoic acid-fortified food on inflammatory markers in healthy subjects--A randomized, placebo-controlled, double-blind study*. *Journal of Nutritional Science & Vitaminology*, 2006. **52**(4): p. 261-5.
243. Fujita, H., A. Asahina, M. Komine, and K. Tamaki, *The direct action of 1alpha,25(OH)2-vitamin D3 on purified mouse Langerhans cells*. *Cellular Immunology*, 2007. **245**(2): p. 70-9.
244. Fumeron, C., T. Nguyen-Khoa, C. Saliel, M. Kebede, C. Buisson, T.B. Druke, B. Lacour, and Z.A. Massy, *Effects of oral vitamin C supplementation on oxidative stress and inflammation status in haemodialysis patients*. *Nephrol Dial Transplant*, 2005. **20**(9): p. 1874-9.
245. Funakoshi, Y., T. Ichiki, K. Ito, and A. Takeshita, *Induction of interleukin-6 expression by angiotensin II in rat vascular smooth muscle cells*. *Hypertension*, 1999. **34**(1): p. 118-25.
246. Furman, I., C. Baudet, and P. Brachet, *Differential expression of M-CSF, LIF, and TNF-alpha genes in normal and malignant rat glial cells: regulation by lipopolysaccharide and vitamin D*. *Journal of Neuroscience Research*, 1996. **46**(3): p. 360-6.
247. Furukawa, K., T. Tashiro, H. Yamamori, K. Takagi, Y. Morishima, T. Sugiura, Y. Otsubo, N. Hayashi, T. Itabashi, W. Sano, et al., *Effects of soybean oil emulsion and eicosapentaenoic acid on stress response and immune function after a severely stressful operation*. *Annals of Surgery*, 1999. **229**(2): p. 255-61.
248. Futamura, Y., *Effect of amiodarone on release of cytokines from mouse alveolar macrophages pretreated with eicosapentaenoic acid*. *Japanese Journal of Pharmacology*, 1995. **69**(4): p. 335-41.
249. Gaddipati, J.P., S.V. Sundar, J. Calemine, P. Seth, G.S. Sidhu, and R.K. Maheshwari, *Differential regulation of cytokines and transcription factors in liver by curcumin following hemorrhage/resuscitation*. *Shock*, 2003. **19**(2): p. 150-6.
250. Gallai, V., P. Sarchielli, A. Trequattrini, M. Franceschini, A. Floridi, C. Firenze, A. Alberti, D. Di Benedetto, and E. Stragliotto, *Cytokine secretion and eicosanoid production in the peripheral blood mononuclear cells of MS patients undergoing dietary*

- supplementation with n-3 polyunsaturated fatty acids*. Journal of Neuroimmunology, 1995. **56**(2): p. 143-53.
251. Ganapathi, M.K., A. Mackiewicz, D. Samols, A. Brabenec, I. Kushner, D. Schultz, and S.I. Hu, *Induction of C-reactive protein by cytokines in human hepatoma cell lines is potentiated by caffeine*. Biochemical Journal, 1990. **269**(1): p. 41-6.
252. Gao, X., J. Kuo, H. Jiang, D. Deeb, Y. Liu, G. Divine, R.A. Chapman, S.A. Dulchavsky, and S.C. Gautam, *Immunomodulatory activity of curcumin: suppression of lymphocyte proliferation, development of cell-mediated cytotoxicity, and cytokine production in vitro*. Biochemical Pharmacology, 2004. **68**(1): p. 51-61.
253. Gao, X., Y.X. Xu, N. Janakiraman, R.A. Chapman, and S.C. Gautam, *Immunomodulatory activity of resveratrol: suppression of lymphocyte proliferation, development of cell-mediated cytotoxicity, and cytokine production*. Biochemical Pharmacology, 2001. **62**(9): p. 1299-308.
254. Garcia-Mediavilla, V., I. Crespo, P.S. Collado, A. Esteller, S. Sanchez-Campos, M.J. Tunon, and J. Gonzalez-Gallego, *The anti-inflammatory flavones quercetin and kaempferol cause inhibition of inducible nitric oxide synthase, cyclooxygenase-2 and reactive C-protein, and down-regulation of the nuclear factor kappaB pathway in Chang Liver cells*. European Journal of Pharmacology, 2007. **557**(2-3): p. 221-9.
255. Gaumont, F., D. Fortin, J. Stankova, and M. Rola-Pleszczynski, *Differential signaling pathways in platelet-activating factor-induced proliferation and interleukin-6 production by rat vascular smooth muscle cells*. Journal of Cardiovascular Pharmacology, 1997. **30**(2): p. 169-75.
256. Gedik, N., L. Kabasakal, O. Sehirli, F. Ercan, S. Sirvanci, M. Keyer-Uysal, and G. Sener, *Long-term administration of aqueous garlic extract (AGE) alleviates liver fibrosis and oxidative damage induced by biliary obstruction in rats*. Life Sciences, 2005. **76**(22): p. 2593-606.
257. Geng, Y., B. Zhang, and M. Lotz, *Protein tyrosine kinase activation is required for lipopolysaccharide induction of cytokines in human blood monocytes*. Journal of Immunology, 1993. **151**(12): p. 6692-700.
258. Gertsch, J., M. Guttinger, J. Heilmann, and O. Sticher, *Curcumin differentially modulates mRNA profiles in Jurkat T and human peripheral blood mononuclear cells*. Bioorganic & Medicinal Chemistry, 2003. **11**(6): p. 1057-63.
259. Ghayour-Mobarhan, M., A. Taylor, S.A. New, D.J. Lamb, and G.A.A. Ferns, *Determinants of serum copper, zinc and selenium in healthy subjects*. Annals of Clinical Biochemistry, 2005. **42**(Pt 5): p. 364-75.
260. Ghayour-Mobarhan, M., H. Yaghootkar, S.A. Lanham-New, D.J. Lamb, and G.A. Ferns, *Association between serum CRP concentrations with dietary intake in healthy and dyslipidaemic patients*. Asia Pacific Journal of Clinical Nutrition, 2007. **16**(2): p. 262-8.
261. Ghazanfari, T., Z.M. Hassan, M. Ebtekar, A. Ahmadiani, G. Naderi, and A. Azar, *Garlic induces a shift in cytokine pattern in Leishmania major-infected BALB/c mice*. Scandinavian Journal of Immunology, 2000. **52**(5): p. 491-5.
262. Gignoux, I., J. Gagnon, A. St-Pierre, B. Cantin, G.R. Dagenais, F. Meyer, J.P. Despres, and B. Lamarche, *Moderate alcohol consumption is more cardioprotective in men with the metabolic syndrome*. J Nutr, 2006. **136**(12): p. 3027-32.

263. Giri, R.K., V. Rajagopal, and V.K. Kalra, *Curcumin, the active constituent of turmeric, inhibits amyloid peptide-induced cytochemokine gene expression and CCR5-mediated chemotaxis of THP-1 monocytes by modulating early growth response-1 transcription factor*. Journal of Neurochemistry, 2004. **91**(5): p. 1199-210.
264. Giulietti, A., E. van Etten, L. Overbergh, K. Stoffels, R. Bouillon, and C. Mathieu, *Monocytes from type 2 diabetic patients have a pro-inflammatory profile. 1,25-Dihydroxyvitamin D(3) works as anti-inflammatory*. Diabetes Research & Clinical Practice, 2007. **77**(1): p. 47-57.
265. Godbout, J.P., B.M. Berg, K.W. Kelley, and R.W. Johnson, *alpha-Tocopherol reduces lipopolysaccharide-induced peroxide radical formation and interleukin-6 secretion in primary murine microglia and in brain*. Journal of Neuroimmunology, 2004. **149**(1-2): p. 101-9.
266. Godoy, I., A.O. Campana, R.R. Geraldo, C.R. Padovani, and S.A. Paiva, *Cytokines and dietary energy restriction in stable chronic obstructive pulmonary disease patients*. Eur Respir J, 2003. **22**(6): p. 920-5.
267. Gogos, C.A., P. Ginopoulos, B. Salsa, E. Apostolidou, N.C. Zoumbos, and F. Kalfarentzos, *Dietary omega-3 polyunsaturated fatty acids plus vitamin E restore immunodeficiency and prolong survival for severely ill patients with generalized malignancy: a randomized control trial*. Cancer, 1998. **82**(2): p. 395-402.
268. Golovko, O., N. Nazarova, and P. Tuohimaa, *Vitamin D-induced up-regulation of tumour necrosis factor alpha (TNF-alpha) in prostate cancer cells*. Life Sciences, 2005. **77**(5): p. 562-77.
269. Gori, A.M., F. Sofi, A.M. Corsi, A. Gazzini, I. Sestini, F. Lauretani, S. Bandinelli, G.F. Gensini, L. Ferrucci, and R. Abbate, *Predictors of vitamin B6 and folate concentrations in older persons: the InCHIANTI study*. Clin Chem, 2006. **52**(7): p. 1318-24.
270. Gottstein, N., B.A. Ewins, C. Eccleston, G.P. Hubbard, I.C. Kavanagh, A.-M. Minihane, P.D. Weinberg, and G. Rimbach, *Effect of genistein and daidzein on platelet aggregation and monocyte and endothelial function*. British Journal of Nutrition, 2003. **89**(5): p. 607-16.
271. Grandjean-Laquerriere, A., S.C. Gangloff, R. Le Naour, C. Trentesaux, W. Hornebeck, and M. Guenounou, *Relative contribution of NF-kappaB and AP-1 in the modulation by curcumin and pyrrolidine dithiocarbamate of the UVB-induced cytokine expression by keratinocytes*. Cytokine, 2002. **18**(3): p. 168-77.
272. Greer, R.M., H.M. Buntain, P.J. Lewindon, C.E. Wainwright, J.M. Potter, J.C. Wong, P.W. Francis, J.A. Batch, and S.C. Bell, *Vitamin A levels in patients with CF are influenced by the inflammatory response*. Journal of Cystic Fibrosis, 2004. **3**(3): p. 143-9.
273. Grzanna, R., P. Phan, A. Polotsky, L. Lindmark, and C.G. Frondoza, *Ginger extract inhibits beta-amyloid peptide-induced cytokine and chemokine expression in cultured THP-1 monocytes*. Journal of Alternative & Complementary Medicine, 2004. **10**(6): p. 1009-13.
274. Guebre-Egziabher, F., R. Rabasa-Lhoret, F. Bonnet, J.P. Bastard, M. Desage, M.R. Skilton, H. Vidal, and M. Laville, *Nutritional intervention to reduce the n-6/n-3 fatty acid ratio increases adiponectin concentration and fatty acid oxidation in healthy subjects*. Eur J Clin Nutr, 2007.

275. Gueniche, A., J. Viac, G. Lizard, M. Charveron, and D. Schmitt, *Protective effect of zinc on keratinocyte activation markers induced by interferon or nickel*. *Acta Dermato-Venereologica*, 1995. **75**(1): p. 19-23.
276. Guerrero-Romero, F. and M. Rodriguez-Moran, *Hypomagnesemia, oxidative stress, inflammation, and metabolic syndrome*. *Diabetes/Metabolism Research Reviews*, 2006. **22**(6): p. 471-6.
277. Gukovsky, I., C.N. Reyes, E.C. Vaquero, A.S. Gukovskaya, and S.J. Pandol, *Curcumin ameliorates ethanol and nonethanol experimental pancreatitis*. *American Journal of Physiology - Gastrointestinal & Liver Physiology*, 2003. **284**(1): p. G85-95.
278. Gulcubuk, A., K. Altunatmaz, K. Sonmez, D. Haktanir-Yatkin, H. Uzun, A. Gurel, and S. Aydin, *Effects of curcumin on tumour necrosis factor-alpha and interleukin-6 in the late phase of experimental acute pancreatitis*. *Journal of Veterinary Medicine - Series A*, 2006. **53**(1): p. 49-54.
279. Guo, T.L., W. Auttachoat, and R.P. Chi, *Genistein enhancement of respiratory allergen trimellitic anhydride-induced IgE production by adult B6C3F1 mice following in utero and postnatal exposure*. *Toxicological Sciences*, 2005. **87**(2): p. 399-408.
280. Guo, W., J.M. Zingg, M. Meydani, and A. Azzi, *Alpha-Tocopherol counteracts ritonavir-induced proinflammatory cytokines expression in differentiated THP-1 cells*. *Biofactors*, 2007. **31**(3-4): p. 171-9.
281. Gutierrez-Venegas, G., M. Jimenez-Estrada, and S. Maldonado, *The effect of flavonoids on transduction mechanisms in lipopolysaccharide-treated human gingival fibroblasts*. *International Immunopharmacology*, 2007. **7**(9): p. 1199-210.
282. Haddad, J.J., S.C. Land, N.E. Saade, and B. Safieh-Garabedian, *Immunomodulatory potential of thymulin-Zn(2+) in the alveolar epithelium: amelioration of endotoxin-induced cytokine release and partial amplification of a cytoprotective IL-10-sensitive pathway*. *Biochemical & Biophysical Research Communications*, 2000. **274**(2): p. 500-5.
283. Haidar and D.W. Soeatmadji, *Effects of high-carbohydrate and high fat diet on formation of foam cells and expression of TNF-alpha in Rattus norvegicus*. *Acta Medica Indonesiana*, 2007. **39**(3): p. 119-23.
284. Hakim, I. and Z. Bar-Shavit, *Modulation of TNF-alpha expression in bone marrow macrophages: involvement of vitamin D response element*. *Journal of Cellular Biochemistry*, 2003. **88**(5): p. 986-98.
285. Hamer, M., E.D. Williams, R. Vuononvirta, E.L. Gibson, and A. Steptoe, *Association between coffee consumption and markers of inflammation and cardiovascular function during mental stress*. *J Hypertens*, 2006. **24**(11): p. 2191-7.
286. Han, S.N., O. Adolfsson, C.-K. Lee, T.A. Prolla, J. Ordovas, and S.N. Meydani, *Age and vitamin E-induced changes in gene expression profiles of T cells*. *Journal of Immunology*, 2006. **177**(9): p. 6052-61.
287. Han, S.N., L.S. Leka, A.H. Lichtenstein, L.M. Ausman, E.J. Schaefer, and S.N. Meydani, *Effect of hydrogenated and saturated, relative to polyunsaturated, fat on immune and inflammatory responses of adults with moderate hypercholesterolemia*. *Journal of Lipid Research*, 2002. **43**(3): p. 445-52.
288. Han, S.N., M. Meydani, D. Wu, B.S. Bender, D.E. Smith, J. Vina, G. Cao, R.L. Prior, and S.N. Meydani, *Effect of long-term dietary antioxidant supplementation on influenza*

- virus infection*. Journals of Gerontology Series A-Biological Sciences & Medical Sciences, 2000. **55**(10): p. B496-503.
289. Han, S.N., D. Wu, W.K. Ha, A. Beharka, D.E. Smith, B.S. Bender, and S.N. Meydani, *Vitamin E supplementation increases T helper 1 cytokine production in old mice infected with influenza virus*. Immunology, 2000. **100**(4): p. 487-93.
290. Hankenson, K.D., B.A. Watkins, I.A. Schoenlein, K.G. Allen, and J.J. Turek, *Omega-3 fatty acids enhance ligament fibroblast collagen formation in association with changes in interleukin-6 production*. Proceedings of the Society for Experimental Biology & Medicine, 2000. **223**(1): p. 88-95.
291. Haqqi, T.M., D.D. Anthony, S. Gupta, N. Ahmad, M.S. Lee, G.K. Kumar, and H. Mukhtar, *Prevention of collagen-induced arthritis in mice by a polyphenolic fraction from green tea*. Proceedings of the National Academy of Sciences of the United States of America, 1999. **96**(8): p. 4524-9.
292. Haraguchi, S., E.N. Brigino-Buenaventura, R. Hitchcock, M. James-Yarish, R.A. Good, and N.K. Day, *Involvement of a herbimycin A-sensitive protein tyrosine kinase in extracellular action of HIV-1 Nef*. Immunology Letters, 2001. **75**(2): p. 97-101.
293. Harbige, L.S., L. Layward, M.M. Morris-Downes, D.C. Dumonde, and S. Amor, *The protective effects of omega-6 fatty acids in experimental autoimmune encephalomyelitis (EAE) in relation to transforming growth factor-beta 1 (TGF-beta1) up-regulation and increased prostaglandin E2 (PGE2) production*. Clinical & Experimental Immunology, 2000. **122**(3): p. 445-52.
294. Hartel, C., A. Puzik, W. Gopel, P. Temming, P. Bucsky, and C. Schultz, *Immunomodulatory effect of vitamin C on intracytoplasmic cytokine production in neonatal cord blood cells*. Neonatology, 2007. **91**(1): p. 54-60.
295. Hartel, C., T. Strunk, P. Bucsky, and C. Schultz, *Effects of vitamin C on intracytoplasmic cytokine production in human whole blood monocytes and lymphocytes*. Cytokine, 2004. **27**(4-5): p. 101-6.
296. Hasan, N., M.U. Siddiqui, Z. Toossi, S. Khan, J. Iqbal, and N. Islam, *Allicin-induced suppression of Mycobacterium tuberculosis 85B mRNA in human monocytes*. Biochemical & Biophysical Research Communications, 2007. **355**(2): p. 471-6.
297. Hasan, N., N. Yusuf, Z. Toossi, and N. Islam, *Suppression of Mycobacterium tuberculosis induced reactive oxygen species (ROS) and TNF-alpha mRNA expression in human monocytes by allicin*. FEBS Letters, 2006. **580**(10): p. 2517-22.
298. Hatakeyama, D., O. Kozawa, T. Otsuka, T. Shibata, and T. Uematsu, *Zinc suppresses IL-6 synthesis by prostaglandin F2alpha in osteoblasts: inhibition of phospholipase C and phospholipase D*. Journal of Cellular Biochemistry, 2002. **85**(3): p. 621-8.
299. Haug, C.J., P. Aukrust, E. Haug, L. Morkrid, F. Muller, and S.S. Froland, *Severe deficiency of 1,25-dihydroxyvitamin D3 in human immunodeficiency virus infection: association with immunological hyperactivity and only minor changes in calcium homeostasis*. Journal of Clinical Endocrinology & Metabolism, 1998. **83**(11): p. 3832-8.
300. Haug, C.J., P. Aukrust, E. Lien, F. Muller, T. Espevik, and S.S. Froland, *Disseminated Mycobacterium avium complex infection in AIDS: immunopathogenic significance of an activated tumor necrosis factor system and depressed serum levels of 1,25 dihydroxyvitamin D*. Journal of Infectious Diseases, 1996. **173**(1): p. 259-62.

301. Hautvast, J.L., J.J. Tolboom, C.E. West, E.M. Kafwembe, R.W. Sauerwein, and W.A. van Staveren, *Malaria is associated with reduced serum retinol levels in rural Zambian children*. International Journal for Vitamin & Nutrition Research, 1998. **68**(6): p. 384-8.
302. Hawkes, J.S., D.L. Bryan, M. Makrides, M.A. Neumann, and R.A. Gibson, *A randomized trial of supplementation with docosahexaenoic acid-rich tuna oil and its effects on the human milk cytokines interleukin 1 beta, interleukin 6, and tumor necrosis factor alpha*. Am J Clin Nutr, 2002. **75**(4): p. 754-60.
303. He, P., Y. Noda, and K. Sugiyama, *Green tea suppresses lipopolysaccharide-induced liver injury in d-galactosamine-sensitized rats*. Journal of Nutrition, 2001. **131**(5): p. 1560-7.
304. Helmersson, J., J. Arnlov, B. Vessby, A. Larsson, G. Alfthan, and S. Basu, *Serum selenium predicts levels of F2-isoprostanes and prostaglandin F2alpha in a 27 year follow-up study of Swedish men*. Free Radical Research, 2005. **39**(7): p. 763-70.
305. Hennig, B., P. Meerarani, P. Ramadass, B.A. Watkins, and M. Toborek, *Fatty acid-mediated activation of vascular endothelial cells*. Metabolism: Clinical & Experimental, 2000. **49**(8): p. 1006-13.
306. Hennig, B., P. Meerarani, M. Toborek, and C.J. McClain, *Antioxidant-like properties of zinc in activated endothelial cells*. Journal of the American College of Nutrition, 1999. **18**(2): p. 152-8.
307. Hida, A.I., T. Kawabata, Y. Minamiyama, A. Mizote, and S. Okada, *Saccharated colloidal iron enhances lipopolysaccharide-induced nitric oxide production in vivo*. Free Radical Biology & Medicine, 2003. **34**(11): p. 1426-34.
308. Hirai, K., S. Fujimura, Y. Shibata, K. Ishihara, T. Kato, K. Okuda, and T. Nakamura, *Differences in TNF-alpha producing activity from murine peritoneal macrophages induced by lipopolysaccharides of Prevotella heparinolytica and Porphyromonas gingivalis*. Bulletin of Tokyo Dental College, 2000. **41**(3): p. 135-40.
309. Hirano, T., S. Higa, J. Arimitsu, T. Naka, Y. Shima, S. Ohshima, M. Fujimoto, T. Yamadori, I. Kawase, and T. Tanaka, *Flavonoids such as luteolin, fisetin and apigenin are inhibitors of interleukin-4 and interleukin-13 production by activated human basophils*. International Archives of Allergy & Immunology, 2004. **134**(2): p. 135-40.
310. Ho, Y.S., H.Y. Ma, H.Y. Chang, B.L. Wei, C.C. Lee, S.Y. Ho, H.R. Guo, T.P. Wu, W.H. Chang, and Y.J. Wang, *Lipid peroxidation and cell death mechanisms in rats and human cells induced by chloral hydrate*. Food & Chemical Toxicology, 2003. **41**(5): p. 621-9.
311. Hodge, G., S. Hodge, and P. Han, *Allium sativum (garlic) suppresses leukocyte inflammatory cytokine production in vitro: potential therapeutic use in the treatment of inflammatory bowel disease*. Cytometry, 2002. **48**(4): p. 209-15.
312. Hodkova, M., S. Dusilova-Sulkova, M. Kalousova, J. Soukupova, T. Zima, D. Mikova, I.M. Malbohan, and J. Bartunkova, *Influence of oral vitamin E therapy on micro-inflammation and cardiovascular disease markers in chronic hemodialysis patients.[see comment]*. Renal Failure, 2006. **28**(5): p. 395-9.
313. Hoffman, T., Y.L. Lee, E.F. Lizzio, A.K. Tripathi, J.J. Jessop, M. Taplits, T.G. Abrahamsen, C.S. Carter, and J. Puri, *Absence of modulation of monokine production via endogenous cyclooxygenase or 5-lipoxygenase metabolites: MK-886 (3-[1-(4-chlorobenzyl)-3-t-butyl-thio-5-isopropylindol-2-yl]-2,2-dimethylpropanoic acid)*,

- indomethacin, or arachidonate fail to alter immunoreactive interleukin-1 beta, or TNF-alpha production by human monocytes in vitro.* Clin Immunol Immunopathol, 1991. **58**(3): p. 399-408.
314. Holladay, C.S., R.M. Wright, and B.L. Spangelo, *Arachidonic acid stimulates interleukin-6 release from rat peritoneal macrophages in vitro: evidence for a prostacyclin-dependent mechanism.* Prostaglandins Leukot Essent Fatty Acids, 1993. **49**(6): p. 915-22.
315. Holm, T., R.K. Berge, A.K. Andreassen, T. Ueland, J. Kjekshus, S. Simonsen, S. Froland, L. Gullestad, and P. Aukrust, *Omega-3 fatty acids enhance tumor necrosis factor-alpha levels in heart transplant recipients.* Transplantation, 2001. **72**(4): p. 706-11.
316. Hooshmand, S., D.Y. Soung, E.A. Lucas, S.V. Madihally, C.W. Levenson, and B.H. Arjmandi, *Genistein reduces the production of proinflammatory molecules in human chondrocytes.* Journal of Nutritional Biochemistry, 2007. **18**(9): p. 609-14.
317. Horrigan, L.A., J.P. Kelly, and T.J. Connor, *Caffeine suppresses TNF-alpha production via activation of the cyclic AMP/protein kinase A pathway.* International Immunopharmacology, 2004. **4**(10-11): p. 1409-17.
318. Hrabinski, D., J.L. Hertz, C. Tantillo, V. Berger, and A.R. Sherman, *Iron repletion attenuates the protective effects of iron deficiency in DMBA-induced mammary tumors in rats.* Nutrition & Cancer, 1995. **24**(2): p. 133-42.
319. Hsieh, C.-C. and B.-F. Lin, *Opposite effects of low and high dose supplementation of vitamin E on survival of MRL/lpr mice.* Nutrition, 2005. **21**(9): p. 940-8.
320. Hsieh, C.-C. and B.-F. Lin, *The effects of vitamin E supplementation on autoimmune-prone New Zealand black x New Zealand white F1 mice fed an oxidised oil diet.* British Journal of Nutrition, 2005. **93**(5): p. 655-62.
321. Hsu, S.-P., M.-S. Wu, C.-C. Yang, K.-C. Huang, S.-Y. Liou, S.-M. Hsu, and C.-T. Chien, *Chronic green tea extract supplementation reduces hemodialysis-enhanced production of hydrogen peroxide and hypochlorous acid, atherosclerotic factors, and proinflammatory cytokines.* American Journal of Clinical Nutrition, 2007. **86**(5): p. 1539-47.
322. Hu, P., D.B. Reuben, E.M. Crimmins, T.B. Harris, M.-H. Huang, and T.E. Seeman, *The effects of serum beta-carotene concentration and burden of inflammation on all-cause mortality risk in high-functioning older persons: MacArthur studies of successful aging.* Journals of Gerontology Series A-Biological Sciences & Medical Sciences, 2004. **59**(8): p. 849-54.
323. Huang, H., T. Liu, J.L. Rose, R.L. Stevens, and D.G. Hoyt, *Sensitivity of mice to lipopolysaccharide is increased by a high saturated fat and cholesterol diet.* J Inflamm (Lond), 2007. **4**: p. 22.
324. Huang, M.-T., Y. Liu, D. Ramji, C.-Y. Lo, G. Ghai, S. Dushenkov, and C.-T. Ho, *Inhibitory effects of black tea theaflavin derivatives on 12-O-tetradecanoylphorbol-13-acetate-induced inflammation and arachidonic acid metabolism in mouse ears.* Molecular Nutrition & Food Research, 2006. **50**(2): p. 115-22.
325. Huang, S.-M., C.-H. Wu, and G.-C. Yen, *Effects of flavonoids on the expression of the pro-inflammatory response in human monocytes induced by ligation of the receptor for AGEs.* Molecular Nutrition & Food Research, 2006. **50**(12): p. 1129-39.

326. Hubbard, N.E., D. Lim, S.D. Somers, and K.L. Erickson, *Effects of in vitro exposure to arachidonic acid on TNF-alpha production by murine peritoneal macrophages*. J Leukoc Biol, 1993. **54**(2): p. 105-10.
327. Huffman, K.M., M.C. Orenduff, G.P. Samsa, J.A. Houmard, W.E. Kraus, and C.W. Bales, *Dietary carbohydrate intake and high-sensitivity C-reactive protein in at-risk women and men*. American Heart Journal, 2007. **154**(5): p. 962-8.
328. Hughes, D.A., A.J. Wright, P.M. Finglas, A.C. Peerless, A.L. Bailey, S.B. Astley, A.C. Pinder, and S. Southon, *The effect of beta-carotene supplementation on the immune function of blood monocytes from healthy male nonsmokers*. J Lab Clin Med, 1997. **129**(3): p. 309-17.
329. Hughes-Fulford, M., C.-F. Li, J. Boonyaratanakornkit, and S. Sayyah, *Arachidonic acid activates phosphatidylinositol 3-kinase signaling and induces gene expression in prostate cancer*. Cancer Research, 2006. **66**(3): p. 1427-33.
330. Humenikova, L. and G. Gates, *Relation between C-reactive protein and serum and dietary antioxidants in older adults at increased risk for cardiovascular disease*. Journal of Nutrition for the Elderly, 2005. **24**(4): p. 23-37.
331. Hung, A.M., G.M. Chertow, B.S. Young, S. Carey, and K.L. Johansen, *Inflammatory markers are unrelated to physical activity, performance, and functioning in hemodialysis*. Journal of Renal Nutrition, 2002. **12**(3): p. 170-6.
332. Ikeda, S., F. Horio, and A. Kakinuma, *Ascorbic acid deficiency changes hepatic gene expression of acute phase proteins in scurvy-prone ODS rats*. Journal of Nutrition, 1998. **128**(5): p. 832-8.
333. Ilsley, S.E., H.M. Miller, and C. Kamel, *Effects of dietary quillaja saponin and curcumin on the performance and immune status of weaned piglets*. J Anim Sci, 2005. **83**(1): p. 82-8.
334. Imamura, T., N. Bando, and R. Yamanishi, *Beta-carotene modulates the immunological function of RAW264, a murine macrophage cell line, by enhancing the level of intracellular glutathione*. Bioscience, Biotechnology & Biochemistry, 2006. **70**(9): p. 2112-20.
335. Imanishi, N., T. Andoh, N. Mantani, S. Sakai, K. Terasawa, Y. Shimada, M. Sato, Y. Katada, K. Ueda, and H. Ochiai, *Macrophage-mediated inhibitory effect of Zingiber officinale Rosc, a traditional oriental herbal medicine, on the growth of influenza A/Aichi/2/68 virus*. American Journal of Chinese Medicine, 2006. **34**(1): p. 157-69.
336. Imano, H., H. Iso, S. Sato, A. Kitamura, T. Okamura, T. Tanigawa, T. Ohira, M. Kudo, Y. Naito, M. Iida, et al., *Determinants of platelet aggregation in 50-70-year-old men from three Japanese communities*. Atherosclerosis, 2002. **165**(2): p. 327-34.
337. Imhof, A., M. Froehlich, H. Brenner, H. Boeing, M.B. Pepys, and W. Koenig, *Effect of alcohol consumption on systemic markers of inflammation*. Lancet, 2001. **357**(9258): p. 763-7.
338. Imhof, A., M. Woodward, A. Doering, N. Helbecque, H. Loewel, P. Amouyel, G.D. Lowe, and W. Koenig, *Overall alcohol intake, beer, wine, and systemic markers of inflammation in western Europe: results from three MONICA samples (Augsburg, Glasgow, Lille)*. Eur Heart J, 2004. **25**(23): p. 2092-100.

339. Ippoushi, K., H. Itou, K. Azuma, and H. Higashio, *Effect of naturally occurring organosulfur compounds on nitric oxide production in lipopolysaccharide-activated macrophages*. Life Sciences, 2002. **71**(4): p. 411-9.
340. Iwanaga, K., T. Hasegawa, D.E. Hultquist, H. Harada, Y. Yoshikawa, S. Yanamadala, H. Liao, S.H. Visovatti, and D.J. Pinsky, *Riboflavin-mediated reduction of oxidant injury, rejection, and vasculopathy after cardiac allotransplantation*. Transplantation, 2007. **83**(6): p. 747-53.
341. Jacobsson, L., F. Lindgarde, R. Manthorpe, and B. Akesson, *Correlation of fatty acid composition of adipose tissue lipids and serum phosphatidylcholine and serum concentrations of micronutrients with disease duration in rheumatoid arthritis*. Annals of the Rheumatic Diseases, 1990. **49**(11): p. 901-5.
342. Jain, A. and E. Basal, *Inhibition of Propionibacterium acnes-induced mediators of inflammation by Indian herbs*. Phytomedicine, 2003. **10**(1): p. 34-8.
343. Jason, J., L.K. Archibald, O.C. Nwanyanwu, A.L. Sowell, I. Buchanan, J. Larned, M. Bell, P.N. Kazembe, H. Dobbie, and W.R. Jarvis, *Vitamin A levels and immunity in humans*. Clinical & Diagnostic Laboratory Immunology, 2002. **9**(3): p. 616-21.
344. Jaspers, I., W. Zhang, L.E. Brighton, J.L. Carson, M. Styblo, and M.A. Beck, *Selenium deficiency alters epithelial cell morphology and responses to influenza*. Free Radical Biology & Medicine, 2007. **42**(12): p. 1826-37.
345. Javadi, P., T.G. Buchman, P.E. Stromberg, I.R. Turnbull, D. Vyas, R.S. Hotchkiss, I.E. Karl, and C.M. Coopersmith, *Iron dysregulation combined with aging prevents sepsis-induced apoptosis*. Journal of Surgical Research, 2005. **128**(1): p. 37-44.
346. Jeevanandam, M., L.M. Shahbazian, and S.R. Petersen, *Proinflammatory cytokine production by mitogen-stimulated peripheral blood mononuclear cells (PBMCs) in trauma patients fed immune-enhancing enteral diets*. Nutrition, 1999. **15**(11-12): p. 842-7.
347. Jeng, K.C., C.S. Yang, W.Y. Siu, Y.S. Tsai, W.J. Liao, and J.S. Kuo, *Supplementation with vitamins C and E enhances cytokine production by peripheral blood mononuclear cells in healthy adults*. Am J Clin Nutr, 1996. **64**(6): p. 960-5.
348. Jeong, H.-J., H.-S. Chung, B.-R. Lee, S.-J. Kim, S.-J. Yoo, S.-H. Hong, and H.-M. Kim, *Expression of proinflammatory cytokines via HIF-1alpha and NF-kappaB activation on desferrioxamine-stimulated HMC-1 cells*. Biochemical & Biophysical Research Communications, 2003. **306**(4): p. 805-11.
349. Jerrard-Dunne, P., M. Sitzler, P. Risley, D.A. Steckel, A. Buehler, S. von Kegler, and H.S. Markus, *Interleukin-6 promoter polymorphism modulates the effects of heavy alcohol consumption on early carotid artery atherosclerosis: the Carotid Atherosclerosis Progression Study (CAPS)*. Stroke, 2003. **34**(2): p. 402-7.
350. Jia, Q., Y. Shi, M.B. Bennink, and J.J. Pestka, *Docosahexaenoic acid and eicosapentaenoic acid, but not alpha-linolenic acid, suppress deoxynivalenol-induced experimental IgA nephropathy in mice*. Journal of Nutrition, 2004. **134**(6): p. 1353-61.
351. Jia, Q., H.R. Zhou, M. Bennink, and J.J. Pestka, *Docosahexaenoic acid attenuates mycotoxin-induced immunoglobulin A nephropathy, interleukin-6 transcription, and mitogen-activated protein kinase phosphorylation in mice*. J Nutr, 2004. **134**(12): p. 3343-9.

352. Jia, Q., H.R. Zhou, Y. Shi, and J.J. Pestka, *Docosahexaenoic acid consumption inhibits deoxynivalenol-induced CREB/ATF1 activation and IL-6 gene transcription in mouse macrophages*. J Nutr, 2006. **136**(2): p. 366-72.
353. Jia, Y. and J.J. Turek, *Altered NF-kappaB gene expression and collagen formation induced by polyunsaturated fatty acids*. Journal of Nutritional Biochemistry, 2005. **16**(8): p. 500-6.
354. Jiang, Q. and B.N. Ames, *Gamma-tocopherol, but not alpha-tocopherol, decreases proinflammatory eicosanoids and inflammation damage in rats*. FASEB Journal, 2003. **17**(8): p. 816-22.
355. Jin, C.Y., J.D. Lee, C. Park, Y.H. Choi, and G.Y. Kim, *Curcumin attenuates the release of pro-inflammatory cytokines in lipopolysaccharide-stimulated BV2 microglia*. Acta Pharmacol Sin, 2007. **28**(10): p. 1645-51.
356. Johansen, K.L., G.A. Kaysen, B.S. Young, A.M. Hung, M. da Silva, and G.M. Chertow, *Longitudinal study of nutritional status, body composition, and physical function in hemodialysis patients.[see comment]*. American Journal of Clinical Nutrition, 2003. **77**(4): p. 842-6.
357. Johnson, J.B., W. Summer, R.G. Cutler, B. Martin, D.H. Hyun, V.D. Dixit, M. Pearson, M. Nassar, R. Telljohann, S. Maudsley, et al., *Alternate day calorie restriction improves clinical findings and reduces markers of oxidative stress and inflammation in overweight adults with moderate asthma*. Free Radic Biol Med, 2007. **42**(5): p. 665-74.
358. Johnson, V.J., M. Tsunoda, and R.P. Sharma, *Increased production of proinflammatory cytokines by murine macrophages following oral exposure to sodium selenite but not to seleno-L-methionine*. Archives of Environmental Contamination & Toxicology, 2000. **39**(2): p. 243-50.
359. Jonasson, L., A. Wikby, and A.G. Olsson, *Low serum beta-carotene reflects immune activation in patients with coronary artery disease*. Nutrition Metabolism & Cardiovascular Diseases, 2003. **13**(3): p. 120-5.
360. Joseph, I.B. and J.T. Isaacs, *Macrophage role in the anti-prostate cancer response to one class of antiangiogenic agents*. J Natl Cancer Inst, 1998. **90**(21): p. 1648-53.
361. Jovanovic, D.V., J.A. Di Battista, J. Martel-Pelletier, F.C. Jolicoeur, Y. He, M. Zhang, F. Mineau, and J.P. Pelletier, *IL-17 stimulates the production and expression of proinflammatory cytokines, IL-beta and TNF-alpha, by human macrophages*. Journal of Immunology, 1998. **160**(7): p. 3513-21.
362. Jung, W.-J. and M.-K. Sung, *Effects of major dietary antioxidants on inflammatory markers of RAW 264.7 macrophages*. Biofactors, 2004. **21**(1-4): p. 113-7.
363. Kahl, S., T.H. Elsasser, and J.W. Blum, *Nutritional regulation of plasma tumor necrosis factor-alpha and plasma and urinary nitrite/nitrate responses to endotoxin in cattle*. Proceedings of the Society for Experimental Biology & Medicine, 1997. **215**(4): p. 370-6.
364. Kandere-Grzybowska, K., D. Kempuraj, J. Cao, C.L. Cetrulo, and T.C. Theoharides, *Regulation of IL-1-induced selective IL-6 release from human mast cells and inhibition by quercetin*. British Journal of Pharmacology, 2006. **148**(2): p. 208-15.

365. Kang, B.Y., Y.J. Song, K.M. Kim, Y.K. Choe, S.Y. Hwang, and T.S. Kim, *Curcumin inhibits Th1 cytokine profile in CD4+ T cells by suppressing interleukin-12 production in macrophages*. British Journal of Pharmacology, 1999. **128**(2): p. 380-4.
366. Kao, T.H., W.M. Wu, C.F. Hung, W.B. Wu, and B.H. Chen, *Anti-inflammatory effects of isoflavone powder produced from soybean cake*. Journal of Agricultural & Food Chemistry, 2007. **55**(26): p. 11068-79.
367. Karahashi, H. and F. Amano, *LPS-induced signals in activation of caspase-3-like protease, a key enzyme regulating apoptotic cell damage into a macrophage-like cell line, J774.1, in the presence of cycloheximide*. Journal of Leukocyte Biology, 1999. **66**(4): p. 689-96.
368. Karsten, S., G. Schafer, and P. Schauder, *Cytokine production and DNA synthesis by human peripheral lymphocytes in response to palmitic, stearic, oleic, and linoleic acid*. Journal of Cellular Physiology, 1994. **161**(1): p. 15-22.
369. Karyadi, E., W.M.V. Dolmans, C.E. West, R. Van Crevel, R.H.H. Nelwan, Z. Amin, R. Gross, J. Van der Ven-Jongekrijg, and J.W.M. Van der Meer, *Cytokines related to nutritional status in patients with untreated pulmonary tuberculosis in Indonesia*. Asia Pacific Journal of Clinical Nutrition, 2007. **16**(2): p. 218-26.
370. Kasim-Karakas, S.E., A. Tsodikov, U. Singh, and I. Jialal, *Responses of inflammatory markers to a low-fat, high-carbohydrate diet: effects of energy intake*. American Journal of Clinical Nutrition, 2006. **83**(4): p. 774-9.
371. Katunuma, N., A. Matsui, K. Endo, J. Hanba, A. Sato, M. Nakano, Y. Yuto, Y. Tada, T. Asao, K. Himeno, et al., *Inhibition of intracellular cathepsin activities and suppression of immune responses mediated by helper T lymphocyte type-2 by peroral or intraperitoneal administration of vitamin B6*. Biochemical & Biophysical Research Communications, 2000. **272**(1): p. 151-5.
372. Kaur, G., L.V.M. Rao, A. Agrawal, and U.R. Pendurthi, *Effect of wine phenolics on cytokine-induced C-reactive protein expression*. Journal of Thrombosis & Haemostasis, 2007. **5**(6): p. 1309-17.
373. Kaur, G., N. Tirkey, S. Bharrhan, V. Chanana, P. Rishi, and K. Chopra, *Inhibition of oxidative stress and cytokine activity by curcumin in amelioration of endotoxin-induced experimental hepatotoxicity in rodents*. Clinical & Experimental Immunology, 2006. **145**(2): p. 313-21.
374. Kawada, N., S. Seki, M. Inoue, and T. Kuroki, *Effect of antioxidants, resveratrol, quercetin, and N-acetylcysteine, on the functions of cultured rat hepatic stellate cells and Kupffer cells*. Hepatology, 1998. **27**(5): p. 1265-74.
375. Keiss, H.-P., V.M. Dirsch, T. Hartung, T. Haffner, L. Trueman, J. Auger, R. Kahane, and A.M. Vollmar, *Garlic (Allium sativum L.) modulates cytokine expression in lipopolysaccharide-activated human blood thereby inhibiting NF-kappaB activity*. Journal of Nutrition, 2003. **133**(7): p. 2171-5.
376. Kellar, K.L., W.C. Hooper, and J.M. Benson, *MEG-01s cells have receptors for and respond to IL-3, IL-6, and SCF*. Experimental Hematology, 1995. **23**(6): p. 557-64.
377. Kelley, D.S., P.C. Taylor, G.J. Nelson, and B.E. Mackey, *Arachidonic acid supplementation enhances synthesis of eicosanoids without suppressing immune functions in young healthy men*. Lipids, 1998. **33**(2): p. 125-30.

378. Kelley, D.S., P.C. Taylor, G.J. Nelson, P.C. Schmidt, A. Ferretti, K.L. Erickson, R. Yu, R.K. Chandra, and B.E. Mackey, *Docosahexaenoic acid ingestion inhibits natural killer cell activity and production of inflammatory mediators in young healthy men*. *Lipids*, 1999. **34**(4): p. 317-24.
379. Kempuraj, D., M.L. Castellani, C. Petrarca, S. Frydas, P. Conti, T.C. Theoharides, and J. Vecchiet, *Inhibitory effect of quercetin on tryptase and interleukin-6 release, and histidine decarboxylase mRNA transcription by human mast cell-1 cell line*. *Clinical & Experimental Medicine*, 2006. **6**(4): p. 150-6.
380. Kempuraj, D., B. Madhappan, S. Christodoulou, W. Boucher, J. Cao, N. Papadopoulou, C.L. Cetrulo, and T.C. Theoharides, *Flavonols inhibit proinflammatory mediator release, intracellular calcium ion levels and protein kinase C theta phosphorylation in human mast cells*. *British Journal of Pharmacology*, 2005. **145**(7): p. 934-44.
381. Kenny, T.P., C.L. Keen, H.H. Schmitz, and M.E. Gershwin, *Immune effects of cocoa procyanidin oligomers on peripheral blood mononuclear cells*. *Exp Biol Med* (Maywood), 2007. **232**(2): p. 293-300.
382. Keogh, J.B., J.A. Grieger, M. Noakes, and P.M. Clifton, *Flow-mediated dilatation is impaired by a high-saturated fat diet but not by a high-carbohydrate diet*. *Arteriosclerosis, Thrombosis & Vascular Biology*, 2005. **25**(6): p. 1274-9.
383. Keogh, J.B., N.D. Luscombe-Marsh, M. Noakes, G.A. Wittert, and P.M. Clifton, *Long-term weight maintenance and cardiovascular risk factors are not different following weight loss on carbohydrate-restricted diets high in either monounsaturated fat or protein in obese hyperinsulinaemic men and women.[see comment]*. *British Journal of Nutrition*, 2007. **97**(2): p. 405-10.
384. Kesherwani, V. and A. Sodhi, *Involvement of tyrosine kinases and MAP kinases in the production of TNF-alpha and IL-1beta by macrophages in vitro on treatment with phytohemagglutinin*. *Journal of Interferon & Cytokine Research*, 2007. **27**(6): p. 497-505.
385. Kew, S., S. Wells, F. Thies, G.P. McNeill, P.T. Quinlan, G.T. Clark, H. Dombrowsky, A.D. Postle, and P.C. Calder, *The effect of eicosapentaenoic acid on rat lymphocyte proliferation depends upon its position in dietary triacylglycerols*. *Journal of Nutrition*, 2003. **133**(12): p. 4230-8.
386. Khalfoun, B., F. Thibault, H. Watier, P. Bardos, and Y. Lebranchu, *Docosahexaenoic and eicosapentaenoic acids inhibit in vitro human endothelial cell production of interleukin-6*. *Advances in Experimental Medicine & Biology*, 1997. **400B**: p. 589-97.
387. Khan, N.A., A. Yessoufou, M. Kim, and A. Hichami, *N-3 fatty acids modulate Th1 and Th2 dichotomy in diabetic pregnancy and macrosomia*. *Journal of Autoimmunity*, 2006. **26**(4): p. 268-77.
388. Khoury, J., T. Henriksen, I. Seljeflot, L. Morkrid, K.F. Froslic, and S. Tonstad, *Effects of an antiatherogenic diet during pregnancy on markers of maternal and fetal endothelial activation and inflammation: the CARRDIP study*. *BJOG: An International Journal of Obstetrics & Gynaecology*, 2007. **114**(3): p. 279-88.
389. Kiecolt-Glaser, J.K., M.A. Belury, K. Porter, D.Q. Beversdorf, S. Lemeshow, and R. Glaser, *Depressive symptoms, omega-6:omega-3 fatty acids, and inflammation in older adults*. *Psychosomatic Medicine*, 2007. **69**(3): p. 217-24.

390. Kilic, S.S., E.Y. Kezer, Y.O. Icol, T. Yakut, S. Aydin, and I.H. Ulus, *Vitamin a deficiency in patients with common variable immunodeficiency*. Journal of Clinical Immunology, 2005. **25**(3): p. 275-80.
391. Kim, A.-J., Y.-O. Kim, J.-S. Shim, and J.-K. Hwang, *Immunostimulating activity of crude polysaccharide extract isolated from Curcuma xanthorrhiza Roxb*. Bioscience, Biotechnology & Biochemistry, 2007. **71**(6): p. 1428-38.
392. Kim, B.H., I.J. Lee, H.-Y. Lee, S.-B. Han, J.T. Hong, B. Ahn, C.-K. Lee, and Y. Kim, *Quercetin 3-O-beta-(2''-galloyl)-glucopyranoside inhibits endotoxin LPS-induced IL-6 expression and NF-kappa B activation in macrophages*. Cytokine, 2007. **39**(3): p. 207-15.
393. Kim, F., M. Pham, I. Luttrell, D.D. Bannerman, J. Tupper, J. Thaler, T.R. Hawn, E.W. Raines, and M.W. Schwartz, *Toll-like receptor-4 mediates vascular inflammation and insulin resistance in diet-induced obesity.[see comment]*. Circulation Research, 2007. **100**(11): p. 1589-96.
394. Kim, G.-Y., K.-H. Kim, S.-H. Lee, M.-S. Yoon, H.-J. Lee, D.-O. Moon, C.-M. Lee, S.-C. Ahn, Y.C. Park, and Y.-M. Park, *Curcumin inhibits immunostimulatory function of dendritic cells: MAPKs and translocation of NF-kappa B as potential targets*. Journal of Immunology, 2005. **174**(12): p. 8116-24.
395. Kim, H.W., A. Murakami, M. Abe, Y. Ozawa, Y. Morimitsu, M.V. Williams, and H. Ohigashi, *Suppressive effects of mioga ginger and ginger constituents on reactive oxygen and nitrogen species generation, and the expression of inducible pro-inflammatory genes in macrophages*. Antioxidants & Redox Signaling, 2005. **7**(11-12): p. 1621-9.
396. Kim, J.K., B.S. Park, M.J. Park, W. Choi, S.K. Ma, M.Y. Nah, C.H. Yeum, K. Jung, S.C. Lee, S.W. Kim, et al., *The predictive parameters of erythropoietin hyporesponsiveness in patients on continuous ambulatory peritoneal dialysis*. Korean Journal of Internal Medicine, 2001. **16**(2): p. 110-7.
397. Kim, J.-Y. and S.-M. Lee, *Effect of alpha-tocopherol on the expression of hepatic vascular stress genes in response to sepsis*. Journal of Toxicology & Environmental Health Part A, 2005. **68**(23-24): p. 2051-62.
398. Kim, M.J., J.M. Aiken, T. Havighurst, J. Hollander, M.O. Ripple, and R. Weindruch, *Adult-onset energy restriction of rhesus monkeys attenuates oxidative stress-induced cytokine expression by peripheral blood mononuclear cells*. Journal of Nutrition, 1997. **127**(12): p. 2293-301.
399. Kim, S.-H., C.-D. Jun, K. Suk, B.-J. Choi, H. Lim, S. Park, S.H. Lee, H.-Y. Shin, D.-K. Kim, and T.-Y. Shin, *Gallic acid inhibits histamine release and pro-inflammatory cytokine production in mast cells*. Toxicological Sciences, 2006. **91**(1): p. 123-31.
400. Kimata, M., N. Inagaki, and H. Nagai, *Effects of luteolin and other flavonoids on IgE-mediated allergic reactions*. Planta Medica, 2000. **66**(1): p. 25-9.
401. Kimmel, P.L., T.M. Phillips, S.Q. Lew, and C.B. Langman, *Zinc modulates mononuclear cellular calcitriol metabolism in peritoneal dialysis patients*. Kidney International, 1996. **49**(5): p. 1407-12.
402. King, D.E., B.M. Egan, and M.E. Geesey, *Relation of dietary fat and fiber to elevation of C-reactive protein.[erratum appears in Am J Cardiol. 2004 Mar 15;93(6):812]*. American Journal of Cardiology, 2003. **92**(11): p. 1335-9.

403. King, D.E., B.M. Egan, R.F. Woolson, A.G. Mainous, 3rd, Y. Al-Solaiman, and A. Jesri, *Effect of a high-fiber diet vs a fiber-supplemented diet on C-reactive protein level*. Archives of Internal Medicine, 2007. **167**(5): p. 502-6.
404. King, D.E., A.G. Mainous, 3rd, M.E. Geesey, and R.F. Woolson, *Dietary magnesium and C-reactive protein levels*. Journal of the American College of Nutrition, 2005. **24**(3): p. 166-71.
405. Kinser, S., M. Li, Q. Jia, and J.J. Pestka, *Truncated deoxynivalenol-induced splenic immediate early gene response in mice consuming (n-3) polyunsaturated fatty acids*. Journal of Nutritional Biochemistry, 2005. **16**(2): p. 88-95.
406. Kleemann, R., H.M.G. Princen, J.J. Emeis, J.W. Jukema, R.D. Fontijn, A.J.G. Horrevoets, T. Kooistra, and L.M. Havekes, *Rosuvastatin reduces atherosclerosis development beyond and independent of its plasma cholesterol-lowering effect in APOE\*3-Leiden transgenic mice: evidence for antiinflammatory effects of rosuvastatin*. Circulation, 2003. **108**(11): p. 1368-74.
407. Kleemann, R., F.W. Scott, U. Worz-Pagenstert, W.M. Nimal Ratnayake, and H. Kolb, *Impact of dietary fat on Th1/Th2 cytokine gene expression in the pancreas and gut of diabetes-prone BB rats*. Journal of Autoimmunity, 1998. **11**(1): p. 97-103.
408. Klein-Platat, C., J. Draï, M. Oujaa, J.L. Schlienger, and C. Simon, *Plasma fatty acid composition is associated with the metabolic syndrome and low-grade inflammation in overweight adolescents*. Am J Clin Nutr, 2005. **82**(6): p. 1178-84.
409. Klerk, M., J. Durga, E.G. Schouten, C. Klufft, F.J. Kok, and P. Verhoef, *No effect of folic acid supplementation in the course of 1 year on haemostasis markers and C-reactive protein in older adults*. Thrombosis & Haemostasis, 2005. **94**(1): p. 96-100.
410. Kobayashi, T., S. Hashimoto, and T. Horie, *Curcumin inhibition of Dermatophagoides farinea-induced interleukin-5 (IL-5) and granulocyte macrophage-colony stimulating factor (GM-CSF) production by lymphocytes from bronchial asthmatics*. Biochemical Pharmacology, 1997. **54**(7): p. 819-24.
411. Kocyigit, A., S. Gur, O. Erel, and M.S. Gurel, *Associations among plasma selenium, zinc, copper, and iron concentrations and immunoregulatory cytokine levels in patients with cutaneous leishmaniasis*. Biological Trace Element Research, 2002. **90**(1-3): p. 47-55.
412. Kodama, K., M. Suzuki, T. Toyosawa, and S. Araki, *Inhibitory mechanisms of highly purified vitamin B2 on the productions of proinflammatory cytokine and NO in endotoxin-induced shock in mice*. Life Sciences, 2005. **78**(2): p. 134-9.
413. Kogiso, M., T. Sakai, K. Mitsuya, T. Komatsu, and S. Yamamoto, *Genistein suppresses antigen-specific immune responses through competition with 17beta-estradiol for estrogen receptors in ovalbumin-immunized BALB/c mice*. Nutrition, 2006. **22**(7-8): p. 802-9.
414. Kong, L.Y., C. Lai, B.C. Wilson, J.N. Simpson, and J.S. Hong, *Protein tyrosine kinase inhibitors decrease lipopolysaccharide-induced proinflammatory cytokine production in mixed glia, microglia-enriched or astrocyte-enriched cultures*. Neurochemistry International, 1997. **30**(4-5): p. 491-7.
415. Kongsbak, K., M.A. Wahed, H. Friis, and S.H. Thilsted, *Acute-phase protein levels, diarrhoea, Trichuris trichiura and maternal education are predictors of serum retinol: a*

- cross-sectional study of children in a Dhaka slum, Bangladesh*. British Journal of Nutrition, 2006. **96**(4): p. 725-34.
416. Kongsbak, K., M.A. Wahed, H. Friis, and S.H. Thilsted, *Acute phase protein levels, T. trichiura, and maternal education are predictors of serum zinc in a cross-sectional study in Bangladeshi children*. Journal of Nutrition, 2006. **136**(8): p. 2262-8.
417. Koren, M.S., J.Q. Purnell, P.A. Breen, C.C. Matthys, H.S. Callahan, and D.S. Weigle, *Plasma C-reactive protein concentration is not affected by isocaloric dietary fat reduction*. Nutrition, 2006. **22**(4): p. 444-8.
418. Kotanidou, A., A. Xagorari, E. Bagli, P. Kitsanta, T. Fotsis, A. Papapetropoulos, and C. Roussos, *Luteolin reduces lipopolysaccharide-induced lethal toxicity and expression of proinflammatory molecules in mice*. American Journal of Respiratory & Critical Care Medicine, 2002. **165**(6): p. 818-23.
419. Koto, T., N. Nagai, H. Mochimaru, T. Kurihara, K. Izumi-Nagai, S. Satofuka, H. Shinoda, K. Noda, Y. Ozawa, M. Inoue, et al., *Eicosapentaenoic acid is anti-inflammatory in preventing choroidal neovascularization in mice*. Investigative Ophthalmology & Visual Science, 2007. **48**(9): p. 4328-34.
420. Kowalski, J., A. Samojedny, M. Paul, G. Pietsz, and T. Wilczok, *Effect of apigenin, kaempferol and resveratrol on the expression of interleukin-1beta and tumor necrosis factor-alpha genes in J774.2 macrophages*. Pharmacological Reports: PR, 2005. **57**(3): p. 390-4.
421. Kowluru, R.A. and M. Kanwar, *Effects of curcumin on retinal oxidative stress and inflammation in diabetes*. Nutr Metab (Lond), 2007. **4**: p. 8.
422. Koyanagi, A., D. Kuffo, L. Gresely, A. Shenkin, and L.E. Cuevas, *Relationships between serum concentrations of C-reactive protein and micronutrients, in patients with tuberculosis*. Annals of Tropical Medicine & Parasitology, 2004. **98**(4): p. 391-9.
423. Krafft, A., G. Perewusnyk, E. Hanseler, K. Quack, R. Huch, and C. Breymann, *Effect of postpartum iron supplementation on red cell and iron parameters in non-anaemic iron-deficient women: a randomised placebo-controlled study*. BJOG: An International Journal of Obstetrics & Gynaecology, 2005. **112**(4): p. 445-50.
424. Kritchevsky, S.B., A.J. Bush, M. Pahor, and M.D. Gross, *Serum carotenoids and markers of inflammation in nonsmokers*. American Journal of Epidemiology, 2000. **152**(11): p. 1065-71.
425. Kugelmas, M., D.B. Hill, B. Vivian, L. Marsano, and C.J. McClain, *Cytokines and NASH: a pilot study of the effects of lifestyle modification and vitamin E*. Hepatology, 2003. **38**(2): p. 413-9.
426. Kuhad, A., S. Pilkhwai, S. Sharma, N. Tirkey, and K. Chopra, *Effect of curcumin on inflammation and oxidative stress in cisplatin-induced experimental nephrotoxicity*. Journal of Agricultural & Food Chemistry, 2007. **55**(25): p. 10150-5.
427. Kuhn, U., P. Brand, J. Willemsen, H. Jonuleit, A.H. Enk, R. van Brandwijk-Petershans, J. Saloga, J. Knop, and D. Becker, *Induction of tyrosine phosphorylation in human MHC class II-positive antigen-presenting cells by stimulation with contact sensitizers*. J Immunol, 1998. **160**(2): p. 667-73.
428. Kumar, A., G. Upadhyay, D.R. Modi, and M.P. Singh, *The involvement of secondary signaling molecules in cytochrome P-450 1A1-mediated inducible nitric oxide synthase*

- expression in benzo(a)pyrene-treated rat polymorphonuclear leukocytes.* Life Sciences, 2007. **81**(23-24): p. 1575-84.
429. Kumar, G.S. and U.N. Das, *Effect of prostaglandins and their precursors on the proliferation of human lymphocytes and their secretion of tumor necrosis factor and various interleukins.* Prostaglandins Leukotrienes & Essential Fatty Acids, 1994. **50**(6): p. 331-4.
430. Kupka, R., G.I. Msamanga, C. Xu, D. Anderson, D. Hunter, and W.W. Fawzi, *Relationship between plasma selenium concentrations and lower genital tract levels of HIV-1 RNA and interleukin type 1beta.* European Journal of Clinical Nutrition, 2007. **61**(4): p. 542-7.
431. Kuvibidila, S. and R.P. Warriar, *Differential effects of iron deficiency and underfeeding on serum levels of interleukin-10, interleukin-12p40, and interferon-gamma in mice.* Cytokine, 2004. **26**(2): p. 73-81.
432. Kuvibidila, S., L. Yu, D. Ode, M. Velez, R. Gardner, and R.P. Warriar, *Effects of iron deficiency on the secretion of interleukin-10 by mitogen-activated and non-activated murine spleen cells.* Journal of Cellular Biochemistry, 2003. **90**(2): p. 278-86.
433. Kuvin, J.T., D.M. Dave, K.A. Sliney, P. Mooney, A.R. Patel, C.D. Kimmelstiel, and R.H. Karas, *Effects of extended-release niacin on lipoprotein particle size, distribution, and inflammatory markers in patients with coronary artery disease.* American Journal of Cardiology, 2006. **98**(6): p. 743-5.
434. Kwon, K.H., A. Murakami, and H. Ohigashi, *Suppressive effects of natural and synthetic agents on dextran sulfate sodium-induced interleukin-1beta release from murine peritoneal macrophages.* Bioscience, Biotechnology & Biochemistry, 2004. **68**(2): p. 436-9.
435. Kwon, K.H., A. Murakami, T. Tanaka, and H. Ohigashi, *Dietary rutin, but not its aglycone quercetin, ameliorates dextran sulfate sodium-induced experimental colitis in mice: attenuation of pro-inflammatory gene expression.* Biochemical Pharmacology, 2005. **69**(3): p. 395-406.
436. Lang, A., M. Lahav, E. Sakhnini, I. Barshack, H.H. Fidler, B. Avidan, E. Bardan, R. Hershkovich, S. Bar-Meir, and Y. Chowers, *Allicin inhibits spontaneous and TNF-alpha induced secretion of proinflammatory cytokines and chemokines from intestinal epithelial cells.* Clinical Nutrition, 2004. **23**(5): p. 1199-208.
437. Langlois, M., D. Duprez, J. Delanghe, M. De Buyzere, and D.L. Clement, *Serum vitamin C concentration is low in peripheral arterial disease and is associated with inflammation and severity of atherosclerosis.* Circulation, 2001. **103**(14): p. 1863-8.
438. Lantz, R.C., G.J. Chen, M. Sarihan, A.M. Solyom, S.D. Jolad, and B.N. Timmermann, *The effect of extracts from ginger rhizome on inflammatory mediator production.* Phytomedicine, 2007. **14**(2-3): p. 123-8.
439. Lantz, R.C., G.J. Chen, A.M. Solyom, S.D. Jolad, and B.N. Timmermann, *The effect of turmeric extracts on inflammatory mediator production.* Phytomedicine, 2005. **12**(6-7): p. 445-52.
440. Lartey, A., A. Manu, K.H. Brown, and K.G. Dewey, *Predictors of micronutrient status among six- to twelve-month-old breast-fed Ghanaian infants.* Journal of Nutrition, 2000. **130**(2): p. 199-207.

441. Le Huong, T., I.D. Brouwer, K.C. Nguyen, J. Burema, and F.J. Kok, *The effect of iron fortification and de-worming on anaemia and iron status of Vietnamese schoolchildren*. British Journal of Nutrition, 2007. **97**(5): p. 955-62.
442. Lee, H.S., K.K. Jung, J.Y. Cho, M.H. Rhee, S. Hong, M. Kwon, S.H. Kim, and S.Y. Kang, *Neuroprotective effect of curcumin is mainly mediated by blockade of microglial cell activation*. Pharmazie, 2007. **62**(12): p. 937-42.
443. Lee, J.-J., W.-T. Huang, D.-Z. Shao, J.-F. Liao, and M.-T. Lin, *Blocking NF-kappaB activation may be an effective strategy in the fever therapy*. Japanese Journal of Physiology, 2003. **53**(5): p. 367-75.
444. Lee, S.-D., C.-Y. Huang, W.-T. Shu, T.-H. Chen, J.A. Lin, H.-H. Hsu, C.-S. Lin, C.-J. Liu, W.-W. Kuo, and L.-M. Chen, *Pro-inflammatory states and IGF-I level in ischemic heart disease with low or high serum iron*. Clinica Chimica Acta, 2006. **370**(1-2): p. 50-6.
445. Lee, W., W.-K. Min, S. Chun, Y.-W. Lee, H. Park, D.H. Lee, Y.K. Lee, and J.E. Son, *Long-term effects of green tea ingestion on atherosclerotic biological markers in smokers*. Clinical Biochemistry, 2005. **38**(1): p. 84-7.
446. Leeb, B.F., G. Witzmann, E. Ogris, A. Studnicka-Benke, I. Andel, H. Schweitzer, and J.S. Smolen, *Folic acid and cyanocobalamin levels in serum and erythrocytes during low-dose methotrexate therapy of rheumatoid arthritis and psoriatic arthritis patients*. Clinical & Experimental Rheumatology, 1995. **13**(4): p. 459-63.
447. Leichtle, A., D. Teupser, and J. Thiery, *Alpha-tocopherol distribution in lipoproteins and anti-inflammatory effects differ between CHD-patients and healthy subjects*. Journal of the American College of Nutrition, 2006. **25**(5): p. 420-8.
448. Leiro, J., J.A. Arranz, N. Fraiz, M.L. Sanmartin, E. Quezada, and F. Orallo, *Effect of cis-resveratrol on genes involved in nuclear factor kappa B signaling*. International Immunopharmacology, 2005. **5**(2): p. 393-406.
449. Lendemans, S., M. Rani, C. Selbach, E. Kreuzfelder, F.U. Schade, and S. Flohe, *GM-CSF priming of human monocytes is dependent on ERK1/2 activation*. Journal of Endotoxin Research, 2006. **12**(1): p. 10-20.
450. Leshchinsky, T.V. and K.C. Klasing, *Profile of chicken cytokines induced by lipopolysaccharide is modulated by dietary alpha-tocopheryl acetate*. Poultry Science, 2003. **82**(8): p. 1266-73.
451. Levitan, E.B., P.M. Ridker, J.E. Manson, M.J. Stampfer, J.E. Buring, N.R. Cook, and S. Liu, *Association between consumption of beer, wine, and liquor and plasma concentration of high-sensitivity C-reactive protein in women aged 39 to 89 years*. American Journal of Cardiology, 2005. **96**(1): p. 83-8.
452. Leyon, P.V. and G. Kuttan, *Studies on the role of some synthetic curcuminoid derivatives in the inhibition of tumour specific angiogenesis*. Journal of Experimental & Clinical Cancer Research, 2003. **22**(1): p. 77-83.
453. Li, B. and S. Yu, *Genistein prevents bone resorption diseases by inhibiting bone resorption and stimulating bone formation*. Biological & Pharmaceutical Bulletin, 2003. **26**(6): p. 780-6.

454. Li, W. and M.A. Beck, *Selenium deficiency induced an altered immune response and increased survival following influenza A/Puerto Rico/8/34 infection*. *Experimental Biology & Medicine*, 2007. **232**(3): p. 412-9.
455. Liappas, I.A., C. Nicolaou, S. Chatzipanagiotou, E.O. Tzavellas, C. Piperi, C. Papageorgiou, F. Boufidou, P. Bagos, and C.R. Soldatos, *Vitamin B12 and hepatic enzyme serum levels correlate with interleukin-6 in alcohol-dependent individuals without liver disease*. *Clinical Biochemistry*, 2007. **40**(11): p. 781-6.
456. Lieber, C.S., M.A. Leo, K.M. Mak, Y. Xu, Q. Cao, C. Ren, A. Ponomarenko, and L.M. DeCarli, *Model of nonalcoholic steatohepatitis*. *Am J Clin Nutr*, 2004. **79**(3): p. 502-9.
457. Lim, G.P., T. Chu, F. Yang, W. Beech, S.A. Frautschy, and G.M. Cole, *The curry spice curcumin reduces oxidative damage and amyloid pathology in an Alzheimer transgenic mouse*. *Journal of Neuroscience*, 2001. **21**(21): p. 8370-7.
458. Lin, B.F., C.H. Huang, B.L. Chiang, and S.J. Jeng, *Dietary fat influences Ia antigen expression, cytokines and prostaglandin E2 production of immune cells in autoimmune-prone NZB x NZW F1 mice*. *British Journal of Nutrition*, 1996. **75**(5): p. 711-22.
459. Liou, Y.A., D.J. King, D. Zibrik, and S.M. Innis, *Decreasing linoleic acid with constant alpha-linolenic acid in dietary fats increases (n-3) eicosapentaenoic acid in plasma phospholipids in healthy men*. *Journal of Nutrition*, 2007. **137**(4): p. 945-52.
460. Literat, A., F. Su, M. Norwicki, M. Durand, R. Ramanathan, C.A. Jones, P. Minoo, and K.Y. Kwong, *Regulation of pro-inflammatory cytokine expression by curcumin in hyaline membrane disease (HMD)*. *Life Sciences*, 2001. **70**(3): p. 253-67.
461. Liu, J., X. Li, Y. Yue, J. Li, T. He, and Y. He, *The inhibitory effect of quercetin on IL-6 production by LPS-stimulated neutrophils*. *Cellular & Molecular Immunology*, 2005. **2**(6): p. 455-60.
462. Liu, S., J.E. Manson, J.E. Buring, M.J. Stampfer, W.C. Willett, and P.M. Ridker, *Relation between a diet with a high glycemic load and plasma concentrations of high-sensitivity C-reactive protein in middle-aged women*. *American Journal of Clinical Nutrition*, 2002. **75**(3): p. 492-8.
463. Liu, Y., L. Gong, D. Li, Z. Feng, L. Zhao, and T. Dong, *Effects of fish oil on lymphocyte proliferation, cytokine production and intracellular signalling in weanling pigs*. *Archiv fur Tierernahrung*, 2003. **57**(3): p. 151-65.
464. Li-Weber, M., M. Giaisi, M.K. Treiber, and P.H. Krammer, *Vitamin E inhibits IL-4 gene expression in peripheral blood T cells*. *European Journal of Immunology*, 2002. **32**(9): p. 2401-8.
465. Lonergan, P.E., D.S. Martin, D.F. Horrobin, and M.A. Lynch, *Neuroprotective actions of eicosapentaenoic acid on lipopolysaccharide-induced dysfunction in rat hippocampus*. *J Neurochem*, 2004. **91**(1): p. 20-9.
466. Long, K.Z., T. Estrada-Garcia, J.L. Rosado, J. Ignacio Santos, M. Haas, M. Firestone, J. Bhagwat, C. Young, H.L. DuPont, E. Hertzmark, et al., *The effect of vitamin A supplementation on the intestinal immune response in Mexican children is modified by pathogen infections and diarrhea*. *Journal of Nutrition*, 2006. **136**(5): p. 1365-70.
467. Lopez-Garcia, E., M.B. Schulze, J.E. Manson, J.B. Meigs, C.M. Albert, N. Rifai, W.C. Willett, and F.B. Hu, *Consumption of (n-3) fatty acids is related to plasma biomarkers of*

- inflammation and endothelial activation in women*. Journal of Nutrition, 2004. **134**(7): p. 1806-11.
468. Lu, Q., I. Bjorkhem, B. Wretling, U. Diczfalusy, P. Henriksson, and A. Freyschuss, *Effect of ascorbic acid on microcirculation in patients with Type II diabetes: a randomized placebo-controlled cross-over study*. Clinical Science, 2005. **108**(6): p. 507-13.
469. Luo, L., A. Petit, J. Antoniou, D.J. Zukor, O.L. Huk, R.C.W. Liu, F.M. Winnik, and F. Mwale, *Effect of cobalt and chromium ions on MMP-1, TIMP-1, and TNF-alpha gene expression in human U937 macrophages: a role for tyrosine kinases*. Biomaterials, 2005. **26**(28): p. 5587-93.
470. Lynch, A.M., D.J. Loane, A.M. Minogue, R.M. Clarke, D. Kilroy, R.E. Nally, O.J. Roche, F. O'Connell, and M.A. Lynch, *Eicosapentaenoic acid confers neuroprotection in the amyloid-beta challenged aged hippocampus*. Neurobiology of Aging, 2007. **28**(6): p. 845-55.
471. Lyu, S.-Y. and W.-B. Park, *Production of cytokine and NO by RAW 264.7 macrophages and PBMC in vitro incubation with flavonoids*. Archives of Pharmacal Research, 2005. **28**(5): p. 573-81.
472. Ma, Y., J.A. Griffith, L. Chasan-Taber, B.C. Olendzki, E. Jackson, E.J. Stanek, 3rd, W. Li, S.L. Pagoto, A.R. Hafner, and I.S. Ockene, *Association between dietary fiber and serum C-reactive protein*. American Journal of Clinical Nutrition, 2006. **83**(4): p. 760-6.
473. Ma, Z.-H., Q.-Y. Ma, L.-C. Wang, H.-C. Sha, S.-L. Wu, and M. Zhang, *Effect of resveratrol on NF-kappaB activity in rat peritoneal macrophages*. American Journal of Chinese Medicine, 2006. **34**(4): p. 623-30.
474. Machelon, V., F. Nome, I. Durand-Gasselin, and D. Emilie, *Tumor necrosis factor-alpha induces interleukin-6 mRNA and protein in human granulosa luteinizing cells via protein tyrosine kinase without involving ceramide*. Molecular & Cellular Endocrinology, 1997. **126**(2): p. 173-84.
475. Madsen, T., J.H. Christensen, M. Blom, and E.B. Schmidt, *The effect of dietary n-3 fatty acids on serum concentrations of C-reactive protein: a dose-response study*. British Journal of Nutrition, 2003. **89**(4): p. 517-22.
476. Madsen, T., J.H. Christensen, and E.B. Schmidt, *C-reactive protein and n-3 fatty acids in patients with a previous myocardial infarction: a placebo-controlled randomized study*. Eur J Nutr, 2007. **46**(7): p. 428-30.
477. Madsen, T., E.B. Schmidt, and J.H. Christensen, *The effect of n-3 fatty acids on C-reactive protein levels in patients with chronic renal failure*. Journal of Renal Nutrition, 2007. **17**(4): p. 258-63.
478. Madsen, T., H.A. Skou, V.E. Hansen, L. Fog, J.H. Christensen, E. Toft, and E.B. Schmidt, *C-reactive protein, dietary n-3 fatty acids, and the extent of coronary artery disease*. American Journal of Cardiology, 2001. **88**(10): p. 1139-42.
479. Maehira, F., I. Miyagi, and Y. Eguchi, *Selenium regulates transcription factor NF-kappaB activation during the acute phase reaction*. Clinica Chimica Acta, 2003. **334**(1-2): p. 163-71.
480. Maes, M., E. Bosmans, R. De Jongh, G. Kenis, E. Vandoolaeghe, and H. Neels, *Increased serum IL-6 and IL-1 receptor antagonist concentrations in major depression and treatment resistant depression*. Cytokine, 1997. **9**(11): p. 853-8.

481. Maes, M., A. Christophe, E. Bosmans, A. Lin, and H. Neels, *In humans, serum polyunsaturated fatty acid levels predict the response of proinflammatory cytokines to psychologic stress*. *Biological Psychiatry*, 2000. **47**(10): p. 910-20.
482. Maes, M., N. De Vos, A. Wauters, P. Demedts, V.W. Maurits, H. Neels, E. Bosmans, C. Altamura, A. Lin, C. Song, et al., *Inflammatory markers in younger vs elderly normal volunteers and in patients with Alzheimer's disease*. *Journal of Psychiatric Research*, 1999. **33**(5): p. 397-405.
483. Maes, M., I. Mihaylova, M. Kubera, and E. Bosmans, *Why fish oils may not always be adequate treatments for depression or other inflammatory illnesses: docosahexaenoic acid, an omega-3 polyunsaturated fatty acid, induces a Th-1-like immune response*. *Neuro Endocrinol Lett*, 2007. **28**(6): p. 875-80.
484. Maher, F.O., D.S. Martin, and M.A. Lynch, *Increased IL-1beta in cortex of aged rats is accompanied by downregulation of ERK and PI-3 kinase*. *Neurobiol Aging*, 2004. **25**(6): p. 795-806.
485. Mahon, A.K., M.G. Flynn, L.K. Stewart, B.K. McFarlin, H.B. Iglay, R.D. Mattes, R.M. Lyle, R.V. Considine, and W.W. Campbell, *Protein intake during energy restriction: effects on body composition and markers of metabolic and cardiovascular health in postmenopausal women*. *Journal of the American College of Nutrition*, 2007. **26**(2): p. 182-9.
486. Mahon, B.D., S.A. Gordon, J. Cruz, F. Cosman, and M.T. Cantorna, *Cytokine profile in patients with multiple sclerosis following vitamin D supplementation*. *Journal of Neuroimmunology*, 2003. **134**(1-2): p. 128-32.
487. Mahon, B.D., A. Wittke, V. Weaver, and M.T. Cantorna, *The targets of vitamin D depend on the differentiation and activation status of CD4 positive T cells*. *Journal of Cellular Biochemistry*, 2003. **89**(5): p. 922-32.
488. Makris, A., C.E. Thornton, B. Xu, and A. Hennessy, *Garlic increases IL-10 and inhibits TNFalpha and IL-6 production in endotoxin-stimulated human placental explants*. *Placenta*, 2005. **26**(10): p. 828-34.
489. Mamani-Matsuda, M., J. Rambert, D. Malvy, H. Lejoly-Boisseau, S. Daulouede, D. Thiolat, S. Coves, P. Courtois, P. Vincendeau, and M.D. Mossalayi, *Quercetin induces apoptosis of Trypanosoma brucei gambiense and decreases the proinflammatory response of human macrophages*. *Antimicrobial Agents & Chemotherapy*, 2004. **48**(3): p. 924-9.
490. Mamputu, J.-C., L. Li, and G. Renier, *Gliclazide inhibits differentiation-associated biologic events in human monocyte-derived macrophages*. *Metabolism: Clinical & Experimental*, 2006. **55**(6): p. 778-85.
491. Mandal, D., S. Bhattacharyya, L. Lahiry, S. Chattopadhyay, G. Sa, and T. Das, *Black tea-induced decrease in IL-10 and TGF-beta of tumor cells promotes Th1/Tc1 response in tumor bearer*. *Nutrition & Cancer*, 2007. **58**(2): p. 213-21.
492. Mandrekar, P., D. Catalano, B. White, and G. Szabo, *Moderate alcohol intake in humans attenuates monocyte inflammatory responses: inhibition of nuclear regulatory factor kappa B and induction of interleukin 10*. *Alcoholism: Clinical & Experimental Research*, 2006. **30**(1): p. 135-9.

493. Mangge, H., H. Kenzian, S. Gallistl, G. Neuwirth, P. Liebmann, W. Kaulfersch, F. Beaufort, W. Muntean, and K. Schauenstein, *Serum cytokines in juvenile rheumatoid arthritis. Correlation with conventional inflammation parameters and clinical subtypes*. *Arthritis Rheum*, 1995. **38**(2): p. 211-20.
494. Mangoni, A.A., R. Arya, E. Ford, B. Asonganyi, R.A. Sherwood, E. Ouldred, C.G. Swift, and S.H.D. Jackson, *Effects of folic acid supplementation on inflammatory and thrombogenic markers in chronic smokers. A randomised controlled trial*. *Thrombosis Research*, 2003. **110**(1): p. 13-7.
495. Mansour, A., B. McCarthy, S.K. Schwander, V. Chang, S. Kotenko, S. Donepudi, J. Lee, and E. Raveche, *Genistein induces G2 arrest in malignant B cells by decreasing IL-10 secretion*. *Cell Cycle*, 2004. **3**(12): p. 1597-605.
496. Mantzioris, E., L.G. Cleland, R.A. Gibson, M.A. Neumann, M. Demasi, and M.J. James, *Biochemical effects of a diet containing foods enriched with n-3 fatty acids*. *American Journal of Clinical Nutrition*, 2000. **72**(1): p. 42-8.
497. Mantzoros, C.S., A.S. Prasad, F.W. Beck, S. Grabowski, J. Kaplan, C. Adair, and G.J. Brewer, *Zinc may regulate serum leptin concentrations in humans*. *Journal of the American College of Nutrition*, 1998. **17**(3): p. 270-5.
498. Marfella, R., F. Cacciapuoti, M. Siniscalchi, F.C. Sasso, F. Marchese, F. Cinone, E. Musacchio, M.A. Marfella, L. Ruggiero, G. Chiorazzo, et al., *Effect of moderate red wine intake on cardiac prognosis after recent acute myocardial infarction of subjects with Type 2 diabetes mellitus*. *Diabetic Medicine*, 2006. **23**(9): p. 974-81.
499. Marier, J.-F., K. Chen, P. Prince, G. Scott, J.R.E. del Castillo, and P. Vachon, *Production of ex vivo lipopolysaccharide-induced tumor necrosis factor-alpha, interleukin-1beta, and interleukin-6 is suppressed by trans-resveratrol in a concentration-dependent manner*. *Canadian Journal of Veterinary Research*, 2005. **69**(2): p. 151-4.
500. Martin, A.R., I. Villegas, M. Sanchez-Hidalgo, and C.A. de la Lastra, *The effects of resveratrol, a phytoalexin derived from red wines, on chronic inflammation induced in an experimentally induced colitis model*. *British Journal of Pharmacology*, 2006. **147**(8): p. 873-85.
501. Mastuda, H., T. Morikawa, K. Ueda, H. Managi, and M. Yoshikawa, *Structural requirements of flavonoids for inhibition of antigen-Induced degranulation, TNF-alpha and IL-4 production from RBL-2H3 cells*. *Bioorganic & Medicinal Chemistry*, 2002. **10**(10): p. 3123-8.
502. Matheu, V., O. Back, E. Mondoc, and S. Issazadeh-Navikas, *Dual effects of vitamin D-induced alteration of TH1/TH2 cytokine expression: enhancing IgE production and decreasing airway eosinophilia in murine allergic airway disease*. *J Allergy Clin Immunol*, 2003. **112**(3): p. 585-92.
503. Mathur, A., H.H. Al-Azzawi, D. Lu, K.W. Yancey, D.A. Swartz-Basile, A. Nakeeb, and H.A. Pitt, *Steatocholecystitis: The Influence of Obesity and Dietary Carbohydrates*. *J Surg Res*, 2007.
504. Matsuda, H., S. Tewtrakul, T. Morikawa, and M. Yoshikawa, *Anti-allergic activity of stilbenes from Korean rhubarb (Rheum undulatum L.): structure requirements for inhibition of antigen-induced degranulation and their effects on the release of TNF-alpha and IL-4 in RBL-2H3 cells*. *Bioorganic & Medicinal Chemistry*, 2004. **12**(18): p. 4871-6.

505. Matsumori, A., K. Ono, R. Nishio, H. Igata, T. Shioi, S. Matsui, Y. Furukawa, A. Iwasaki, Y. Nose, and S. Sasayama, *Modulation of cytokine production and protection against lethal endotoxemia by the cardiac glycoside ouabain*. *Circulation*, 1997. **96**(5): p. 1501-6.
506. Matsuyama, S., Y. Koide, and T.O. Yoshida, *HLA class II molecule-mediated signal transduction mechanism responsible for the expression of interleukin-1 beta and tumor necrosis factor-alpha genes induced by a staphylococcal superantigen*. *European Journal of Immunology*, 1993. **23**(12): p. 3194-202.
507. Mattioli, A.V., L. Bonetti, M. Zennaro, S. Ripa, and G. Mattioli, *Prognostic value of iron, nutritional status indexes and acute phase protein in acute coronary syndromes*. *Italian Heart Journal: Official Journal of the Italian Federation of Cardiology*, 2002. **3**(3): p. 194-8.
508. Mayland, C., K.R. Allen, T.J. Degg, and M. Bennet, *Micronutrient concentrations in patients with malignant disease: effect of the inflammatory response*. *Annals of Clinical Biochemistry*, 2004. **41**(Pt 2): p. 138-41.
509. Mayland, C.R., M.I. Bennett, and K. Allan, *Vitamin C deficiency in cancer patients*. *Palliat Med*, 2005. **19**(1): p. 17-20.
510. Mazzon, E., C. Muia, R.D. Paola, T. Genovese, M. Menegazzi, A. De Sarro, H. Suzuki, and S. Cuzzocrea, *Green tea polyphenol extract attenuates colon injury induced by experimental colitis*. *Free Radical Research*, 2005. **39**(9): p. 1017-25.
511. McMillan, D.C., D. Talwar, N. Sattar, M. Underwood, D.S.J. O'Reilly, and C. McArdle, *The relationship between reduced vitamin antioxidant concentrations and the systemic inflammatory response in patients with common solid tumours*. *Clinical Nutrition*, 2002. **21**(2): p. 161-4.
512. Meerarani, P., G. Reiterer, M. Toborek, and B. Hennig, *Zinc modulates PPARgamma signaling and activation of porcine endothelial cells*. *Journal of Nutrition*, 2003. **133**(10): p. 3058-64.
513. Meksawan, K., J.T. Venkatraman, A.B. Awad, and D.R. Pendergast, *Effect of dietary fat intake and exercise on inflammatory mediators of the immune system in sedentary men and women*. *Journal of the American College of Nutrition*, 2004. **23**(4): p. 331-40.
514. Melero, I., A. Salmeron, M.A. Balboa, J. Aramburu, and M. Lopez-Botet, *Tyrosine kinase-dependent activation of human NK cell functions upon stimulation through a 58-kDa surface antigen selectively expressed on discrete subsets of NK cells and T lymphocytes*. *Journal of Immunology*, 1994. **152**(4): p. 1662-73.
515. Melichar, B., P. Jandik, M. Tichy, F. Malir, J. Mergancova, and Z. Voboril, *Urinary zinc excretion and acute phase response in cancer patients*. *Clinical Investigator*, 1994. **72**(12): p. 1012-4.
516. Mendez-Samperio, P., M. Hernandez-Garay, and A.N. Vazquez, *Cellular activation induced by BCG is a PTK-dependent event*. *Cellular Immunology*, 1996. **171**(1): p. 147-52.
517. Merry, K. and M. Gowen, *The transcriptional control of TGF-beta in human osteoblast-like cells is distinct from that of IL-1 beta*. *Cytokine*, 1992. **4**(3): p. 171-9.

518. Metz, C.H.D., A.K. Schroder, S. Overbeck, L. Kahmann, B. Plumakers, and L. Rink, *T-helper type 1 cytokine release is enhanced by in vitro zinc supplementation due to increased natural killer cells*. Nutrition, 2007. **23**(2): p. 157-63.
519. Mezzano, D., *Distinctive effects of red wine and diet on haemostatic cardiovascular risk factors*. Biological Research, 2004. **37**(2): p. 217-24.
520. Mezzano, D., F. Leighton, C. Martinez, G. Marshall, A. Cuevas, O. Castillo, O. Panes, B. Munoz, D.D. Perez, C. Mizon, et al., *Complementary effects of Mediterranean diet and moderate red wine intake on haemostatic cardiovascular risk factors*. European Journal of Clinical Nutrition, 2001. **55**(6): p. 444-51.
521. Miguez, M., H. Anisman, J.M. Weber, and Z. Merali, *Effects of acute or chronic omega-3 and omega-6 polyunsaturated fatty acid treatment on behavioral, neuroendocrine and cytokine changes elicited by exogenous interleukin-1beta challenge*. J Neuroimmunol, 2006. **181**(1-2): p. 19-28.
522. Miles, E.A., T. Banerjee, S.J. Wells, and P.C. Calder, *Limited effect of eicosapentaenoic acid on T-lymphocyte and natural killer cell numbers and functions in healthy young males*. Nutrition, 2006. **22**(5): p. 512-9.
523. Miller, R.R., G.E. Hicks, M.D. Shardell, A.R. Cappola, W.G. Hawkes, J.A. Yu-Yahiro, A. Keegan, and J. Magaziner, *Association of serum vitamin D levels with inflammatory response following hip fracture: the Baltimore Hip Studies*. Journals of Gerontology Series A-Biological Sciences & Medical Sciences, 2007. **62**(12): p. 1402-6.
524. Min, Y.D., C.H. Choi, H. Bark, H.Y. Son, H.H. Park, S. Lee, J.W. Park, E.K. Park, H.I. Shin, and S.H. Kim, *Quercetin inhibits expression of inflammatory cytokines through attenuation of NF-kappaB and p38 MAPK in HMC-1 human mast cell line*. Inflammation Research, 2007. **56**(5): p. 210-5.
525. Minihane, A.M., L.M. Brady, S.S. Lovegrove, S.V. Lesauvage, C.M. Williams, and J.A. Lovegrove, *Lack of effect of dietary n-6:n-3 PUFA ratio on plasma lipids and markers of insulin responses in Indian Asians living in the UK*. European Journal of Nutrition, 2005. **44**(1): p. 26-32.
526. Minoguchi, K., N. Yamashita, N. Oda, M. Takeno, H. Kaneoka, and T. Sakane, *Protein tyrosine phosphorylation: A possible common signaling pathway in human Th1 and Th2 cell clones*. International Archives of Allergy & Immunology, 1999. **118**(1): p. 30-6.
527. Minogue, A.M., A.M. Lynch, D.J. Loane, C.E. Herron, and M.A. Lynch, *Modulation of amyloid-beta-induced and age-associated changes in rat hippocampus by eicosapentaenoic acid*. Journal of Neurochemistry, 2007. **103**(3): p. 914-26.
528. Mitjans, M., J. del Campo, C. Abajo, V. Martinez, A. Selga, C. Lozano, J.L. Torres, and M.P. Vinardell, *Immunomodulatory activity of a new family of antioxidants obtained from grape polyphenols*. Journal of Agricultural & Food Chemistry, 2004. **52**(24): p. 7297-9.
529. Mitjans, M., V. Martinez, J. del Campo, C. Abajo, C. Lozano, J.L. Torres, and M.P. Vinardell, *Novel epicatechin derivatives with antioxidant activity modulate interleukin-1beta release in lipopolysaccharide-stimulated human blood*. Bioorganic & Medicinal Chemistry Letters, 2004. **14**(20): p. 5031-4.

530. Mitra, A.K., J.O. Alvarez, M.A. Wahed, G.J. Fuchs, and C.B. Stephensen, *Predictors of serum retinol in children with shigellosis.[see comment]*. American Journal of Clinical Nutrition, 1998. **68**(5): p. 1088-94.
531. Mizrahi, B., L. Shapira, A.J. Domb, and Y. Houry-Haddad, *Citrus oil and MgCl<sub>2</sub> as antibacterial and anti-inflammatory agents*. Journal of Periodontology, 2006. **77**(6): p. 963-8.
532. Mizuno, Y., T. Furusho, A. Yoshida, H. Nakamura, T. Matsuura, and Y. Eto, *Serum vitamin A concentrations in asthmatic children in Japan*. Pediatrics International, 2006. **48**(3): p. 261-4.
533. Mol, M.J., Y.B. de Rijke, P.N. Demacker, and A.F. Stalenhoef, *Plasma levels of lipid and cholesterol oxidation products and cytokines in diabetes mellitus and cigarette smoking: effects of vitamin E treatment*. Atherosclerosis, 1997. **129**(2): p. 169-76.
534. Molvig, J., F. Pociot, H. Worsaae, L.D. Wogensen, L. Baek, P. Christensen, T. Mandrup-Poulsen, K. Andersen, P. Madsen, J. Dyerberg, et al., *Dietary supplementation with omega-3-polyunsaturated fatty acids decreases mononuclear cell proliferation and interleukin-1 beta content but not monokine secretion in healthy and insulin-dependent diabetic individuals*. Scandinavian Journal of Immunology, 1991. **34**(4): p. 399-410.
535. Mondal, K., O.I. Sirenko, A.K. Lofquist, J.S. Morris, J.S. Haskill, and J.M. Watson, *Differential role of tyrosine phosphorylation in adhesion-induced transcription, mRNA stability, and cytoskeletal organization in human monocytes*. Journal of Leukocyte Biology, 2000. **67**(2): p. 216-25.
536. Moon, D.O., K.C. Kim, C.Y. Jin, M.H. Han, C. Park, K.J. Lee, Y.M. Park, Y.H. Choi, and G.Y. Kim, *Inhibitory effects of eicosapentaenoic acid on lipopolysaccharide-induced activation in BV2 microglia*. Int Immunopharmacol, 2007. **7**(2): p. 222-9.
537. Mori, T.A., R.J. Woodman, V. Burke, I.B. Puddey, K.D. Croft, and L.J. Beilin, *Effect of eicosapentaenoic acid and docosahexaenoic acid on oxidative stress and inflammatory markers in treated-hypertensive type 2 diabetic subjects*. Free Radical Biology & Medicine, 2003. **35**(7): p. 772-81.
538. Morris, P.E., L.E. Olmstead, A.E. Howard-Carroll, G.R. Dickens, M.L. Goltz, C. Courtney-Shapiro, and P. Fanti, *In vitro and in vivo effects of genistein on murine alveolar macrophage TNF alpha production*. Inflammation, 1999. **23**(3): p. 231-9.
539. Mravec, B., *Does the vagus nerve mediate the effects of polyunsaturated fatty acid treatment on behavioral, neuroendocrine and cytokine changes elicited by exogenous interleukin-1beta challenge?* Journal of Neuroimmunology, 2007. **185**(1-2): p. 208-10.
540. Mukamal, K.J., M. Cushman, M.A. Mittleman, R.P. Tracy, and D.S. Siscovick, *Alcohol consumption and inflammatory markers in older adults: the Cardiovascular Health Study*. Atherosclerosis, 2004. **173**(1): p. 79-87.
541. Mukamal, K.J., N.S. Jenny, R.P. Tracy, and D.S. Siscovick, *Alcohol consumption, interleukin-6 and apolipoprotein E genotypes, and concentrations of interleukin-6 and serum amyloid P in older adults*. American Journal of Clinical Nutrition, 2007. **86**(2): p. 444-50.
542. Mukherjee, M., A.S. Das, D. Das, S. Mukherjee, S. Mitra, and C. Mitra, *Role of peritoneal macrophages and lymphocytes in the development of hypogonadal*

- osteoporosis in an ovariectomized rat model: possible phytoestrogenic efficacy of oil extract of garlic to preserve skeletal health.* *Phytother Res*, 2007.
543. Mukherjee, S., S.K. Banerjee, M. Maulik, A.K. Dinda, K.K. Talwar, and S.K. Maulik, *Protection against acute adriamycin-induced cardiotoxicity by garlic: role of endogenous antioxidants and inhibition of TNF-alpha expression.* *BMC Pharmacology*, 2003. **3**: p. 16.
544. Mukherjee, S., D. Das, M. Mukherjee, A.S. Das, and C. Mitra, *Synergistic effect of folic acid and vitamin B12 in ameliorating arsenic-induced oxidative damage in pancreatic tissue of rat.* *Journal of Nutritional Biochemistry*, 2006. **17**(5): p. 319-27.
545. Mulherin, D.M., D.I. Thurnham, and R.D. Situnayake, *Glutathione reductase activity, riboflavin status, and disease activity in rheumatoid arthritis.* *Annals of the Rheumatic Diseases*, 1996. **55**(11): p. 837-40.
546. Muller, K., P.M. Haahr, M. Diamant, K. Rieneck, A. Kharazmi, and K. Bendtzen, *1,25-Dihydroxyvitamin D3 inhibits cytokine production by human blood monocytes at the post-transcriptional level.* *Cytokine*, 1992. **4**(6): p. 506-12.
547. Murakami, A., R. Hayashi, T. Tanaka, K.H. Kwon, H. Ohigashi, and R. Safitri, *Suppression of dextran sodium sulfate-induced colitis in mice by zerumbone, a subtropical ginger sesquiterpene, and nimesulide: separately and in combination.* [erratum appears in *Biochem Pharmacol.* 2004 Jan 15;67(2):395 Note: Takana Takuji [corrected to Tanakja Takuji]]. *Biochemical Pharmacology*, 2003. **66**(7): p. 1253-61.
548. Murakami, A., M. Miyamoto, and H. Ohigashi, *Zerumbone, an anti-inflammatory phytochemical, induces expression of proinflammatory cytokine genes in human colon adenocarcinoma cell lines.* *Biofactors*, 2004. **21**(1-4): p. 95-101.
549. Murphy, K.J., B.J. Meyer, T.A. Mori, V. Burke, J. Mansour, C.S. Patch, L.C. Tapsell, M. Noakes, P.A. Clifton, A. Barden, et al., *Impact of foods enriched with n-3 long-chain polyunsaturated fatty acids on erythrocyte n-3 levels and cardiovascular risk factors.* *Br J Nutr*, 2007. **97**(4): p. 749-57.
550. Murphy, R.T., J.B. Foley, M.-T. Tome, N.T. Mulvihill, A. Murphy, N. McCarroll, P. Crean, and M.J. Walsh, *Vitamin E modulation of C-reactive protein in smokers with acute coronary syndromes.* *Free Radical Biology & Medicine*, 2004. **36**(8): p. 959-65.
551. Muthukumar, A.R., C.A. Jolly, K. Zaman, and G. Fernandes, *Calorie restriction decreases proinflammatory cytokines and polymeric Ig receptor expression in the submandibular glands of autoimmune prone (NZB x NZW)F1 mice.* *Journal of Clinical Immunology*, 2000. **20**(5): p. 354-61.
552. Nabakwe, E.C., W.V.M. Lichtenbelt, D.K. Ngare, M. Wierik, K.R. Westerterp, and O.C. Owino, *Vitamin a deficiency and anaemia in young children living in a malaria endemic district of western Kenya.* *East African Medical Journal*, 2005. **82**(6): p. 300-6.
553. Nagashima, H., K. Nakamura, and T. Goto, *Hepatotoxin rubratoxin B induced the secretion of TNF-alpha, IL-8, and MCP-1 in HL60 cells.* *Biochemical & Biophysical Research Communications*, 2001. **287**(4): p. 829-32.
554. Nair, M.P., S. Mahajan, J.L. Reynolds, R. Aalinkeel, H. Nair, S.A. Schwartz, and C. Kandaswami, *The flavonoid quercetin inhibits proinflammatory cytokine (tumor necrosis factor alpha) gene expression in normal peripheral blood mononuclear cells via*

- modulation of the NF-kappa beta system. Clinical & Vaccine Immunology: CVI, 2006. 13(3): p. 319-28.*
555. Nair, M.P.N., C. Kandaswami, S. Mahajan, K.C. Chadha, R. Chawda, H. Nair, N. Kumar, R.E. Nair, and S.A. Schwartz, *The flavonoid, quercetin, differentially regulates Th-1 (IFN $\gamma$ ) and Th-2 (IL4) cytokine gene expression by normal peripheral blood mononuclear cells. Biochimica et Biophysica Acta, 2002. 1593(1): p. 29-36.*
556. Nakanishi, N., K. Suzuki, and K. Tatara, *Association between lifestyle and white blood cell count: a study of Japanese male office workers. Occup Med (Lond), 2003. 53(2): p. 135-7.*
557. Nakano, N., A. Nakao, T. Uchida, N. Shirasaka, H. Yoshizumi, K. Okumura, R. Tsuboi, and H. Ogawa, *Effects of arachidonic acid analogs on Fc $\epsilon$ RI-mediated activation of mast cells. Biochimica et Biophysica Acta, 2005. 1738(1-3): p. 19-28.*
558. Nakaya, M., H. Tachibana, and K. Yamada, *Isoflavone genistein and daidzein up-regulate LPS-induced inducible nitric oxide synthase activity through estrogen receptor pathway in RAW264.7 cells. Biochemical Pharmacology, 2005. 71(1-2): p. 108-14.*
559. Nanji, A.A., A.J. Dannenberg, K. Jokelainen, and N.M. Bass, *Alcoholic liver injury in the rat is associated with reduced expression of peroxisome proliferator-alpha (PPAR $\alpha$ )-regulated genes and is ameliorated by PPAR $\alpha$  activation. Journal of Pharmacology & Experimental Therapeutics, 2004. 310(1): p. 417-24.*
560. Nanji, A.A., B. Griniuviene, L.K. Yacoub, F. Fogt, and S.R. Tahan, *Intercellular adhesion molecule-1 expression in experimental alcoholic liver disease: relationship to endotoxemia and TNF alpha messenger RNA. Experimental & Molecular Pathology, 1995. 62(1): p. 42-51.*
561. Nanji, A.A., K. Jokelainen, A. Rahemtulla, L. Miao, F. Fogt, H. Matsumoto, S.R. Tahan, and G.L. Su, *Activation of nuclear factor kappa B and cytokine imbalance in experimental alcoholic liver disease in the rat. Hepatology, 1999. 30(4): p. 934-43.*
562. Nanji, A.A., K. Jokelainen, G.L. Tipoe, A. Rahemtulla, P. Thomas, and A.J. Dannenberg, *Curcumin prevents alcohol-induced liver disease in rats by inhibiting the expression of NF-kappa B-dependent genes. American Journal of Physiology - Gastrointestinal & Liver Physiology, 2003. 284(2): p. G321-7.*
563. Nanji, A.A., L. Miao, P. Thomas, A. Rahemtulla, S. Khwaja, S. Zhao, D. Peters, S.R. Tahan, and A.J. Dannenberg, *Enhanced cyclooxygenase-2 gene expression in alcoholic liver disease in the rat.[see comment]. Gastroenterology, 1997. 112(3): p. 943-51.*
564. Nanji, A.A., S. Zhao, S.M. Sadrzadeh, and D.J. Waxman, *Use of reverse transcription-polymerase chain reaction to evaluate in vivo cytokine gene expression in rats fed ethanol for long periods. Hepatology, 1994. 19(6): p. 1483-7.*
565. Napoli, C., C. Cicala, J.L. Wallace, F. de Nigris, V. Santagada, G. Caliendo, F. Franconi, L.J. Ignarro, and G. Cirino, *Protease-activated receptor-2 modulates myocardial ischemia-reperfusion injury in the rat heart. Proceedings of the National Academy of Sciences of the United States of America, 2000. 97(7): p. 3678-83.*
566. Nedzvetsky, V.S., M. Tuzcu, A. Yasar, A.A. Tikhomirov, and G. Baydas, *Effects of vitamin E against aluminum neurotoxicity in rats. Biochemistry-Russia, 2006. 71(3): p. 239-44.*

567. Nguyen-Khoa, T., Z.A. Massy, J.P. De Bandt, M. Kebede, L. Salama, G. Lambrey, V. Witko-Sarsat, T.B. Druke, B. Lacour, and M. Thevenin, *Oxidative stress and haemodialysis: role of inflammation and duration of dialysis treatment*. Nephrology Dialysis Transplantation, 2001. **16**(2): p. 335-40.
568. Nicklas, B.J., W. Ambrosius, S.P. Messier, G.D. Miller, B.W. Penninx, R.F. Loeser, S. Palla, E. Bleecker, and M. Pahor, *Diet-induced weight loss, exercise, and chronic inflammation in older, obese adults: a randomized controlled clinical trial*. Am J Clin Nutr, 2004. **79**(4): p. 544-51.
569. Nieman, D.C., D.A. Henson, J.M. Davis, E. Angela Murphy, D.P. Jenkins, S.J. Gross, M.D. Carmichael, J.C. Quindry, C.L. Dumke, A.C. Utter, et al., *Quercetin's influence on exercise-induced changes in plasma cytokines and muscle and leukocyte cytokine mRNA*. Journal of Applied Physiology, 2007. **103**(5): p. 1728-35.
570. Nieman, D.C., D.A. Henson, J.M. Davis, C.L. Dumke, S.J. Gross, D.P. Jenkins, E.A. Murphy, M.D. Carmichael, J.C. Quindry, S.R. McAnulty, et al., *Quercetin ingestion does not alter cytokine changes in athletes competing in the Western States Endurance Run*. Journal of Interferon & Cytokine Research, 2007. **27**(12): p. 1003-11.
571. Nikawa, T., K. Odahara, H. Koizumi, Y. Kido, S. Teshima, K. Rokutan, and K. Kishi, *Vitamin A prevents the decline in immunoglobulin A and Th2 cytokine levels in small intestinal mucosa of protein-malnourished mice*. Journal of Nutrition, 1999. **129**(5): p. 934-41.
572. Nishitani, Y., S. Okazaki, K. Imabayashi, R. Katada, K. Umetani, H. Yajima, and H. Matsumoto, *Saturated and monounsaturated fatty acids increase interleukin-10 production in rat hepatocytes*. Nihon Arukoru Yakubutsu Igakkai Zasshi, 2007. **42**(1): p. 32-5.
573. Niu, K., A. Hozawa, S. Kuriyama, K. Ohmori-Matsuda, T. Shimazu, N. Nakaya, K. Fujita, I. Tsuji, and R. Nagatomi, *Dietary long-chain n-3 fatty acids of marine origin and serum C-reactive protein concentrations are associated in a population with a diet rich in marine products*. American Journal of Clinical Nutrition, 2006. **84**(1): p. 223-9.
574. Niu, K.C., K.C. Lin, C.Y. Yang, and M.T. Lin, *Protective effects of alpha-tocopherol and mannitol in both circulatory shock and cerebral ischaemia injury in rat heatstroke*. Clinical & Experimental Pharmacology & Physiology, 2003. **30**(10): p. 745-51.
575. Noakes, M., P.R. Foster, J.B. Keogh, A.P. James, J.C. Mamo, and P.M. Clifton, *Comparison of isocaloric very low carbohydrate/high saturated fat and high carbohydrate/low saturated fat diets on body composition and cardiovascular risk*. Nutr Metab (Lond), 2006. **3**: p. 7.
576. Noh, K., H. Lim, S.-K. Moon, J.S. Kang, W.J. Lee, D. Lee, and Y.-i. Hwang, *Mega-dose Vitamin C modulates T cell functions in Balb/c mice only when administered during T cell activation*. Immunology Letters, 2005. **98**(1): p. 63-72.
577. Nolan, B., J. Sentementes, and P. Bankey, *Hepatocyte polyunsaturated fatty acid enrichment increases acute phase protein synthesis*. Surgery, 1998. **124**(2): p. 471-6.
578. Nonn, L., D. Duong, and D.M. Peehl, *Chemopreventive anti-inflammatory activities of curcumin and other phytochemicals mediated by MAP kinase phosphatase-5 in prostate cells*. Carcinogenesis, 2007. **28**(6): p. 1188-96.

579. Nonn, L., L. Peng, D. Feldman, and D.M. Peehl, *Inhibition of p38 by vitamin D reduces interleukin-6 production in normal prostate cells via mitogen-activated protein kinase phosphatase 5: implications for prostate cancer prevention by vitamin D*. Cancer Research, 2006. **66**(8): p. 4516-24.
580. Nonnecke, B.J., W.R. Waters, M.R. Foote, R.L. Horst, M.A. Fowler, and B.L. Miller, *In vitro effects of 1,25-dihydroxyvitamin D3 on interferon-gamma and tumor necrosis factor-alpha secretion by blood leukocytes from young and adult cattle vaccinated with Mycobacterium bovis BCG*. International Journal for Vitamin & Nutrition Research, 2003. **73**(4): p. 235-44.
581. Nusing, R.M. and J. Barsig, *Induction of prostanoid, nitric oxide, and cytokine formation in rat bone marrow derived macrophages by activin A*. British Journal of Pharmacology, 1999. **127**(4): p. 919-26.
582. Obermuller-Jevic, U.C., B. Schlegel, A. Flaccus, and H.K. Biesalski, *The effect of beta-carotene on the expression of interleukin-6 and heme oxygenase-1 in UV-irradiated human skin fibroblasts in vitro*. FEBS Letters, 2001. **509**(2): p. 186-90.
583. Obertreis, B., T. Ruttkowski, T. Teucher, B. Behnke, and H. Schmitz, *Ex-vivo in-vitro inhibition of lipopolysaccharide stimulated tumor necrosis factor-alpha and interleukin-1 beta secretion in human whole blood by extractum urticae dioicae foliorum*. Arzneimittelforschung, 1996. **46**(4): p. 389-94.
584. Ockenfels, H.M., C. Keim-Maas, R. Funk, G. Nussbaum, and M. Goos, *Ethanol enhances the IFN-gamma, TGF-alpha and IL-6 secretion in psoriatic co-cultures*. British Journal of Dermatology, 1996. **135**(5): p. 746-51.
585. Oda, E., K. Hatada, J. Kimura, Y. Aizawa, P.V. Thanikachalam, and K. Watanabe, *Relationships between serum unsaturated fatty acids and coronary risk factors: negative relations between nervonic acid and obesity-related risk factors*. International Heart Journal, 2005. **46**(6): p. 975-85.
586. Oelzner, P., S. Franke, A. Muller, G. Hein, and G. Stein, *Relationship between soluble markers of immune activation and bone turnover in post-menopausal women with rheumatoid arthritis*. Rheumatology (Oxford), 1999. **38**(9): p. 841-7.
587. Okamoto, N., T. Murata, H. Tamai, H. Tanaka, and H. Nagai, *Effects of alpha tocopherol and probucol supplements on allergen-induced airway inflammation and hyperresponsiveness in a mouse model of allergic asthma*. International Archives of Allergy & Immunology, 2006. **141**(2): p. 172-80.
588. Okunieff, P., J. Xu, D. Hu, W. Liu, L. Zhang, G. Morrow, A. Pentland, J.L. Ryan, and I. Ding, *Curcumin protects against radiation-induced acute and chronic cutaneous toxicity in mice and decreases mRNA expression of inflammatory and fibrogenic cytokines*. International Journal of Radiation Oncology, Biology, Physics, 2006. **65**(3): p. 890-8.
589. Oldenburg, B., G.P. van Berge Henegouwen, D. Rennick, B.S. Van Asbeck, and J.C. Koningsberger, *Iron supplementation affects the production of pro-inflammatory cytokines in IL-10 deficient mice*. European Journal of Clinical Investigation, 2000. **30**(6): p. 505-10.
590. Olynyk, J.K. and S.L. Clarke, *Iron overload impairs pro-inflammatory cytokine responses by Kupffer cells*. Journal of Gastroenterology & Hepatology, 2001. **16**(4): p. 438-44.

591. Omara, F.O., B.R. Blakley, and H.S. Huang, *Effect of iron status on endotoxin-induced mortality, phagocytosis and interleukin-1 alpha and tumor necrosis factor-alpha production*. *Veterinary & Human Toxicology*, 1994. **36**(5): p. 423-8.
592. Omu, A.E., H. Dashti, and S. Al-Othman, *Treatment of asthenozoospermia with zinc sulphate: andrological, immunological and obstetric outcome*. *European Journal of Obstetrics, Gynecology, & Reproductive Biology*, 1998. **79**(2): p. 179-84.
593. O'Shea, F.D., F.W.L. Tsui, B. Chiu, H.W. Tsui, M. Yazdanpanah, and R.D. Inman, *Retinol (vitamin A) and retinol-binding protein levels are decreased in ankylosing spondylitis: clinical and genetic analysis*. *Journal of Rheumatology*, 2007. **34**(12): p. 2457-9.
594. Oz, H.S., T.S. Chen, C.J. McClain, and W.J.S. de Villiers, *Antioxidants as novel therapy in a murine model of colitis*. *Journal of Nutritional Biochemistry*, 2005. **16**(5): p. 297-304.
595. Oz, H.S., C.J. McClain, H.T. Nagasawa, M.B. Ray, W.J.S. de Villiers, and T.S. Chen, *Diverse antioxidants protect against acetaminophen hepatotoxicity*. *Journal of Biochemical & Molecular Toxicology*, 2004. **18**(6): p. 361-8.
596. Pai, J.K., S.E. Hankinson, R. Thadhani, N. Rifai, T. Pischon, and E.B. Rimm, *Moderate alcohol consumption and lower levels of inflammatory markers in US men and women*. *Atherosclerosis*, 2006. **186**(1): p. 113-20.
597. Pajonk, F., A. Riedisser, M. Henke, W.H. McBride, and B. Fiebich, *The effects of tea extracts on proinflammatory signaling*. *BMC Medicine*, 2006. **4**: p. 28.
598. Pallast, E.G., E.G. Schouten, F.G. de Waart, H.C. Fonk, G. Doekes, B.M. von Blomberg, and F.J. Kok, *Effect of 50- and 100-mg vitamin E supplements on cellular immune function in noninstitutionalized elderly persons*. *American Journal of Clinical Nutrition*, 1999. **69**(6): p. 1273-81.
599. Palmbos, P.L., M.J. Sytsma, D.H. DeHeer, and J.D. Bonnema, *Macrophage exposure to particulate titanium induces phosphorylation of the protein tyrosine kinase lyn and the phospholipases Cgamma-1 and Cgamma-2*. *Journal of Orthopaedic Research*, 2002. **20**(3): p. 483-9.
600. Pang, J.L., D.A. Ricupero, S. Huang, N. Fatma, D.P. Singh, J.R. Romero, and N. Chattopadhyay, *Differential activity of kaempferol and quercetin in attenuating tumor necrosis factor receptor family signaling in bone cells*. *Biochemical Pharmacology*, 2006. **71**(6): p. 818-26.
601. Pankow, J.S., A.R. Folsom, M. Cushman, I.B. Borecki, P.N. Hopkins, J.H. Eckfeldt, and R.P. Tracy, *Familial and genetic determinants of systemic markers of inflammation: the NHLBI family heart study*. *Atherosclerosis*, 2001. **154**(3): p. 681-9.
602. Paradkar, P.N., P.S. Blum, M.A. Berhow, H. Baumann, and S.M. Kuo, *Dietary isoflavones suppress endotoxin-induced inflammatory reaction in liver and intestine*. *Cancer Lett*, 2004. **215**(1): p. 21-8.
603. Parikh, A.A., A.L. Salzman, C.D. Kane, J.E. Fischer, and P.O. Hasselgren, *IL-6 production in human intestinal epithelial cells following stimulation with IL-1 beta is associated with activation of the transcription factor NF-kappa B*. *Journal of Surgical Research*, 1997. **69**(1): p. 139-44.

604. Park, J., S.W. Chung, S.H. Kim, and T.S. Kim, *Up-regulation of interleukin-4 production via NF-AT/AP-1 activation in T cells by biochanin A, a phytoestrogen and its metabolites*. Toxicology & Applied Pharmacology, 2006. **212**(3): p. 188-99.
605. Park, J., S.H. Kim, D. Cho, and T.S. Kim, *Formononetin, a phyto-oestrogen, and its metabolites up-regulate interleukin-4 production in activated T cells via increased AP-1 DNA binding activity*. Immunology, 2005. **116**(1): p. 71-81.
606. Parodi, F.E., D. Mao, T.L. Ennis, M.B. Pagano, and R.W. Thompson, *Oral administration of diferuloylmethane (curcumin) suppresses proinflammatory cytokines and destructive connective tissue remodeling in experimental abdominal aortic aneurysms*. Annals of Vascular Surgery, 2006. **20**(3): p. 360-8.
607. Patel, J.V., K.W. Lee, J. Tomson, K. Dubb, E.A. Hughes, and G.Y. Lip, *Effects of omega-3 polyunsaturated fatty acids on metabolically active hormones in patients post-myocardial infarction*. Int J Cardiol, 2007. **115**(1): p. 42-5.
608. Patel, S., T. Farragher, J. Berry, D. Bunn, A. Silman, and D. Symmons, *Association between serum vitamin D metabolite levels and disease activity in patients with early inflammatory polyarthritis*. Arthritis & Rheumatism, 2007. **56**(7): p. 2143-9.
609. Pena, A.S., E. Wiltshire, R. Gent, L. Piotto, C. Hirte, and J. Couper, *Folic acid does not improve endothelial function in obese children and adolescents*. Diabetes Care, 2007. **30**(8): p. 2122-7.
610. Peracchi, M., F. Bamonti Catena, M. Pomati, M. De Franceschi, and G. Scalabrino, *Human cobalamin deficiency: alterations in serum tumour necrosis factor-alpha and epidermal growth factor*. European Journal of Haematology, 2001. **67**(2): p. 123-7.
611. Pereira, M.A., J. Swain, A.B. Goldfine, N. Rifai, and D.S. Ludwig, *Effects of a low-glycemic load diet on resting energy expenditure and heart disease risk factors during weight loss.[see comment]*. JAMA, 2004. **292**(20): p. 2482-90.
612. Peretz, A., J. Neve, and J.P. Famaey, *Effects of chronic and acute corticosteroid therapy on zinc and copper status in rheumatoid arthritis patients*. Journal of Trace Elements & Electrolytes in Health & Disease, 1989. **3**(2): p. 103-8.
613. Petersson, H., S. Basu, T. Cederholm, and U. Riserus, *Serum fatty acid composition and indices of stearoyl-CoA desaturase activity are associated with systemic inflammation : longitudinal analyses in middle-aged men*. Br J Nutr, 2007: p. 1-4.
614. Pichler, J., M. Gerstmayr, Z. Szepfalusi, R. Urbanek, M. Peterlik, and M. Willheim, *1 alpha,25(OH)2D3 inhibits not only Th1 but also Th2 differentiation in human cord blood T cells*. Pediatr Res, 2002. **52**(1): p. 12-8.
615. Pie, S., A. Awati, S. Vida, I. Falluel, B.A. Williams, and I.P. Oswald, *Effects of added fermentable carbohydrates in the diet on intestinal proinflammatory cytokine-specific mRNA content in weaning piglets*. Journal of Animal Science, 2007. **85**(3): p. 673-83.
616. Pinna, K., D.S. Kelley, P.C. Taylor, and J.C. King, *Immune functions are maintained in healthy men with low zinc intake*. J Nutr, 2002. **132**(7): p. 2033-6.
617. Pirro, M., G. Schillaci, G. Savarese, F. Gemelli, M.R. Mannarino, D. Siepi, F. Bagaglia, and E. Mannarino, *Attenuation of inflammation with short-term dietary intervention is associated with a reduction of arterial stiffness in subjects with hypercholesterolaemia*. European Journal of Cardiovascular Prevention & Rehabilitation, 2004. **11**(6): p. 497-502.

618. Pischon, T., S.E. Hankinson, G.S. Hotamisligil, N. Rifai, W.C. Willett, and E.B. Rimm, *Habitual dietary intake of n-3 and n-6 fatty acids in relation to inflammatory markers among US men and women*. *Circulation*, 2003. **108**(2): p. 155-60.
619. Prasad, A.S., B. Bao, F.W.J. Beck, O. Kucuk, and F.H. Sarkar, *Antioxidant effect of zinc in humans*. *Free Radical Biology & Medicine*, 2004. **37**(8): p. 1182-90.
620. Prasad, A.S., F.W. Beck, S.M. Grabowski, J. Kaplan, and R.H. Mathog, *Zinc deficiency: changes in cytokine production and T-cell subpopulations in patients with head and neck cancer and in noncancer subjects*. *Proceedings of the Association of American Physicians*, 1997. **109**(1): p. 68-77.
621. Prasad, A.S., F.W.J. Beck, B. Bao, J.T. Fitzgerald, D.C. Snell, J.D. Steinberg, and L.J. Cardozo, *Zinc supplementation decreases incidence of infections in the elderly: effect of zinc on generation of cytokines and oxidative stress*. *American Journal of Clinical Nutrition*, 2007. **85**(3): p. 837-44.
622. Prehn, J.L., D.L. Fagan, S.C. Jordan, and J.S. Adams, *Potentiation of lipopolysaccharide-induced tumor necrosis factor-alpha expression by 1,25-dihydroxyvitamin D3*. *Blood*, 1992. **80**(11): p. 2811-6.
623. Priante, G., L. Bordin, E. Musacchio, G. Clari, and B. Baggio, *Fatty acids and cytokine mRNA expression in human osteoblastic cells: a specific effect of arachidonic acid*. *Clinical Science*, 2002. **102**(4): p. 403-9.
624. Punithavathi, D., N. Venkatesan, and M. Babu, *Curcumin inhibition of bleomycin-induced pulmonary fibrosis in rats*. *British Journal of Pharmacology*, 2000. **131**(2): p. 169-72.
625. Punithavathi, D., N. Venkatesan, and M. Babu, *Protective effects of curcumin against amiodarone-induced pulmonary fibrosis in rats*. *British Journal of Pharmacology*, 2003. **139**(7): p. 1342-50.
626. Pupe, A., H. Degreef, and M. Garmyn, *Induction of tumor necrosis factor-alpha by UVB: a role for reactive oxygen intermediates and eicosanoids*. *Photochemistry & Photobiology*, 2003. **78**(1): p. 68-74.
627. Pupe, A., R. Moison, P. De Haes, G.B. van Henegouwen, L. Rhodes, H. Degreef, and M. Garmyn, *Eicosapentaenoic acid, a n-3 polyunsaturated fatty acid differentially modulates TNF-alpha, IL-1alpha, IL-6 and PGE2 expression in UVB-irradiated human keratinocytes*. *Journal of Investigative Dermatology*, 2002. **118**(4): p. 692-8.
628. Purasiri, P., A. McKechnie, S.D. Heys, and O. Eremin, *Modulation in vitro of human natural cytotoxicity, lymphocyte proliferative response to mitogens and cytokine production by essential fatty acids*. *Immunology*, 1997. **92**(2): p. 166-72.
629. Purasiri, P., A. Murray, S. Richardson, S.D. Heys, D. Horrobin, and O. Eremin, *Modulation of cytokine production in vivo by dietary essential fatty acids in patients with colorectal cancer*. *Clinical Science*, 1994. **87**(6): p. 711-7.
630. Puskas, L.G., E. Bereczki, M. Santha, L. Vigh, G. Csanadi, F. Spener, P. Ferdinandy, A. Onochy, and K. Kitajka, *Cholesterol and cholesterol plus DHA diet-induced gene expression and fatty acid changes in mouse eye and brain*. *Biochimie*, 2004. **86**(11): p. 817-24.

631. Qi, L., R.M. van Dam, S. Liu, M. Franz, C. Mantzoros, and F.B. Hu, *Whole-grain, bran, and cereal fiber intakes and markers of systemic inflammation in diabetic women*. *Diabetes Care*, 2006. **29**(2): p. 207-11.
632. Raaska, K., V. Raitasuo, J. Laitila, and P.J. Neuvonen, *Effect of caffeine-containing versus decaffeinated coffee on serum clozapine concentrations in hospitalised patients*. *Basic & Clinical Pharmacology & Toxicology*, 2004. **94**(1): p. 13-8.
633. Rachon, D., G. Rimoldi, and W. Wuttke, *In vitro effects of genistein and resveratrol on the production of interferon-gamma (IFN $\gamma$ ) and interleukin-10 (IL-10) by stimulated murine splenocytes*. *Phytomedicine*, 2006. **13**(6): p. 419-24.
634. Rafferty, T.S., C. Walker, J.A.A. Hunter, G.J. Beckett, and R.C. McKenzie, *Inhibition of ultraviolet B radiation-induced interleukin 10 expression in murine keratinocytes by selenium compounds*. *British Journal of Dermatology*, 2002. **146**(3): p. 485-9.
635. Rahmati, M.A., R.G. Craig, P. Homel, G.A. Kaysen, and N.W. Levin, *Serum markers of periodontal disease status and inflammation in hemodialysis patients*. *American Journal of Kidney Diseases*, 2002. **40**(5): p. 983-9.
636. Raina, N. and K.N. Jeejeebhoy, *Effect of low-protein diet and protein supplementation on the expressions of TNF-alpha, TNFR-I, and TNFR-II in organs and muscle of LPS-injected rats*. *American Journal of Physiology - Endocrinology & Metabolism*, 2004. **286**(3): p. E481-7.
637. Rajdl, D., J. Racek, L. Trefil, and K. Siala, *Effect of white wine consumption on oxidative stress markers and homocysteine levels*. *Physiological Research*, 2007. **56**(2): p. 203-12.
638. Ramanathan, K., M. Anusuyadevi, S. Shila, and C. Panneerselvam, *Ascorbic acid and alpha-tocopherol as potent modulators of apoptosis on arsenic induced toxicity in rats*. *Toxicology Letters*, 2005. **156**(2): p. 297-306.
639. Ramiro, E., A. Franch, C. Castellote, C. Andres-Lacueva, M. Izquierdo-Pulido, and M. Castell, *Effect of Theobroma cacao flavonoids on immune activation of a lymphoid cell line*. *British Journal of Nutrition*, 2005. **93**(6): p. 859-66.
640. Ramiro, E., A. Franch, C. Castellote, F. Perez-Cano, J. Permanyer, M. Izquierdo-Pulido, and M. Castell, *Flavonoids from Theobroma cacao down-regulate inflammatory mediators*. *Journal of Agricultural & Food Chemistry*, 2005. **53**(22): p. 8506-11.
641. Rangan, G.K., Y. Wang, Y.C. Tay, and D.C. Harris, *Inhibition of NFkappaB activation with antioxidants is correlated with reduced cytokine transcription in PTC*. *American Journal of Physiology*, 1999. **277**(5 Pt 2): p. F779-89.
642. Rao, Y.K., S.-H. Fang, and Y.-M. Tzeng, *Inhibitory effects of the flavonoids isolated from Waltheria indica on the production of NO, TNF-alpha and IL-12 in activated macrophages*. *Biological & Pharmaceutical Bulletin*, 2005. **28**(5): p. 912-5.
643. Raqib, R., S.K. Roy, M.J. Rahman, T. Azim, S.S. Ameer, J. Chisti, and J. Andersson, *Effect of zinc supplementation on immune and inflammatory responses in pediatric patients with shigellosis*. *American Journal of Clinical Nutrition*, 2004. **79**(3): p. 444-50.
644. Raung, S.-L., S.-Y. Chen, S.-L. Liao, J.-H. Chen, and C.-J. Chen, *Tyrosine kinase inhibitors attenuate Japanese encephalitis virus-induced neurotoxicity*. *Biochemical & Biophysical Research Communications*, 2005. **327**(2): p. 399-406.
645. Reilly, N., V. Poylin, M. Menconi, A. Onderdonk, S. Bengmark, and P.O. Hasselgren, *Probiotics potentiate IL-6 production in IL-1beta-treated Caco-2 cells through a heat*

- shock-dependent mechanism*. Am J Physiol Regul Integr Comp Physiol, 2007. **293**(3): p. R1169-79.
646. Reimund, J.M., C. Hirth, C. Koehl, R. Baumann, and B. Duclos, *Antioxidant and immune status in active Crohn's disease. A possible relationship*. Clinical Nutrition, 2000. **19**(1): p. 43-8.
647. Reiterer, G., M. Toborek, and B. Hennig, *Quercetin protects against linoleic acid-induced porcine endothelial cell dysfunction*. Journal of Nutrition, 2004. **134**(4): p. 771-5.
648. Rembiasz, K., A. Budzynski, D. Karcz, P.C. Konturek, S.J. Konturek, and J. Stachura, *Multifocal atrophic gastritis: pathogenesis and therapeutic implications*. European Journal of Gastroenterology & Hepatology, 2005. **17**(8): p. 857-63.
649. Ramirez, D., V. Fernandez, G. Tapia, R. Gonzalez, and L.A. Videla, *Influence of C-phycocyanin on hepatocellular parameters related to liver oxidative stress and Kupffer cell functioning*. Inflammation Research, 2002. **51**(7): p. 351-6.
650. Renier, G., I. Clement, A.C. Desfaits, and A. Lambert, *Direct stimulatory effect of insulin-like growth factor-I on monocyte and macrophage tumor necrosis factor-alpha production*. Endocrinology, 1996. **137**(11): p. 4611-8.
651. Retterstol, L., K.E. Berge, O. Braaten, L. Eikvar, T.R. Pedersen, and L. Sandvik, *A daily glass of red wine: does it affect markers of inflammation?* Alcohol & Alcoholism, 2005. **40**(2): p. 102-5.
652. Reyes-Gordillo, K., J. Segovia, M. Shibayama, P. Vergara, M.G. Moreno, and P. Muriel, *Curcumin protects against acute liver damage in the rat by inhibiting NF-kappaB, proinflammatory cytokines production and oxidative stress*. Biochimica et Biophysica Acta, 2007. **1770**(6): p. 989-96.
653. Riachy, R., B. Vandewalle, S. Belaich, J. Kerr-Conte, V. Gmyr, F. Zerimech, M. d'Herbomez, J. Lefebvre, and F. Pattou, *Beneficial effect of 1,25 dihydroxyvitamin D3 on cytokine-treated human pancreatic islets*. Journal of Endocrinology, 2001. **169**(1): p. 161-8.
654. Riancho, J.A., M.T. Zarrabeitia, A.L. de Francisco, J.A. Amado, J. Napal, M. Arias, and J. Gonzalez-Macias, *Vitamin D therapy modulates cytokine secretion in patients with renal failure*. Nephron, 1993. **65**(3): p. 364-8.
655. Richard, N., D. Porath, A. Radspieler, and J. Schwager, *Effects of resveratrol, piceatannol, tri-acetoxystilbene, and genistein on the inflammatory response of human peripheral blood leukocytes*. Molecular Nutrition & Food Research, 2005. **49**(5): p. 431-42.
656. Rickard, D.J., D.G. Monroe, T.J. Ruesink, S. Khosla, B.L. Riggs, and T.C. Spelsberg, *Phytoestrogen genistein acts as an estrogen agonist on human osteoblastic cells through estrogen receptors alpha and beta*. Journal of Cellular Biochemistry, 2003. **89**(3): p. 633-46.
657. Riechman, S.E., R.D. Andrews, D.A. Maclean, and S. Sheather, *Statins and dietary and serum cholesterol are associated with increased lean mass following resistance training*. J Gerontol A Biol Sci Med Sci, 2007. **62**(10): p. 1164-71.
658. Ritter, M., K. Hohenberger, P. Alter, M. Herzum, J. Tebbe, and M. Maisch, *Caffeine inhibits cytokine expression in lymphocytes*. Cytokine, 2005. **30**(4): p. 177-81.

659. Roberts, M.D., M. Iosia, C.M. Kerksick, L.W. Taylor, B. Campbell, C.D. Wilborn, T. Harvey, M. Cooke, C. Rasmussen, M. Greenwood, et al., *Effects of arachidonic acid supplementation on training adaptations in resistance-trained males*. J Int Soc Sports Nutr, 2007. **4**: p. 21.
660. Rodriguez-Cabezas, M.E., J. Galvez, D. Camuesco, M.D. Lorente, A. Concha, O. Martinez-Augustin, L. Redondo, and A. Zarzuelo, *Intestinal anti-inflammatory activity of dietary fiber (Plantago ovata seeds) in HLA-B27 transgenic rats*. Clinical Nutrition, 2003. **22**(5): p. 463-71.
661. Rodriguez-Moran, M. and F. Guerrero-Romero, *Elevated concentrations of TNF-alpha are related to low serum magnesium levels in obese subjects*. Magnesium Research, 2004. **17**(3): p. 189-96.
662. Rodriguez-Moran, M. and F. Guerrero-Romero, *Serum magnesium and C-reactive protein levels*. Arch Dis Child, 2007.
663. Romeo, J., J. Warnberg, E. Nova, L.E. Diaz, M. Gonzalez-Gross, and A. Marcos, *Changes in the immune system after moderate beer consumption*. Annals of Nutrition & Metabolism, 2007. **51**(4): p. 359-66.
664. Root, M.M., J. Hu, L.S. Stephenson, R.S. Parker, and T.C. Campbell, *Iron status of middle-aged women in five counties of rural China*. European Journal of Clinical Nutrition, 1999. **53**(3): p. 199-206.
665. Rosales, F.J., *Vitamin a supplementation of vitamin a deficient measles patients lowers the risk of measles-related pneumonia in zambian children*. Journal of Nutrition, 2002. **132**(12): p. 3700-3.
666. Rosales, F.J., J.D. Topping, J.E. Smith, A.H. Shankar, and A.C. Ross, *Relation of serum retinol to acute phase proteins and malarial morbidity in Papua New Guinea children*. American Journal of Clinical Nutrition, 2000. **71**(6): p. 1582-8.
667. Rosolowska-Huszcz, D., L. Kozłowska, and A. Rydzewski, *Influence of low protein diet on nonthyroidal illness syndrome in chronic renal failure*. Endocrine, 2005. **27**(3): p. 283-8.
668. Rothman, D., H. Allen, L. Herzog, A. Pilapil, C.M. Seiler, and R.B. Zurier, *Effects of unsaturated fatty acids on interleukin-1beta production by human monocytes*. Cytokine, 1997. **9**(12): p. 1008-12.
669. Roubenoff, R., R.A. Roubenoff, J.G. Cannon, J.J. Kehayias, H. Zhuang, B. Dawson-Hughes, C.A. Dinarello, and I.H. Rosenberg, *Rheumatoid cachexia: cytokine-driven hypermetabolism accompanying reduced body cell mass in chronic inflammation*. Journal of Clinical Investigation, 1994. **93**(6): p. 2379-86.
670. Roubenoff, R., R.A. Roubenoff, J. Selhub, M.R. Nadeau, J.G. Cannon, L.M. Freeman, C.A. Dinarello, and I.H. Rosenberg, *Abnormal vitamin B6 status in rheumatoid cachexia. Association with spontaneous tumor necrosis factor alpha production and markers of inflammation*. Arthritis & Rheumatism, 1995. **38**(1): p. 105-9.
671. Rowley, K., K.Z. Walker, J. Cohen, A.J. Jenkins, D. O'Neal, Q. Su, J.D. Best, and K. O'Dea, *Inflammation and vascular endothelial activation in an Aboriginal population: relationships to coronary disease risk factors and nutritional markers*. Medical Journal of Australia, 2003. **178**(10): p. 495-500.

672. Royal, W., 3rd, H. Wang, O. Jones, H. Tran, and J.L. Bryant, *A vitamin A deficient diet enhances proinflammatory cytokine, Mu opioid receptor, and HIV-1 expression in the HIV-1 transgenic rat*. Journal of Neuroimmunology, 2007. **185**(1-2): p. 29-36.
673. Rude, R.K., H.E. Gruber, H.J. Norton, L.Y. Wei, A. Frausto, and J. Kilburn, *Reduction of dietary magnesium by only 50% in the rat disrupts bone and mineral metabolism*. Osteoporosis International, 2006. **17**(7): p. 1022-32.
674. Rude, R.K., H.E. Gruber, H.J. Norton, L.Y. Wei, A. Frausto, and B.G. Mills, *Bone loss induced by dietary magnesium reduction to 10% of the nutrient requirement in rats is associated with increased release of substance P and tumor necrosis factor-alpha*. Journal of Nutrition, 2004. **134**(1): p. 79-85.
675. Rude, R.K., H.E. Gruber, L.Y. Wei, A. Frausto, and B.G. Mills, *Magnesium deficiency: effect on bone and mineral metabolism in the mouse*. Calcified Tissue International, 2003. **72**(1): p. 32-41.
676. Ruetten, H. and C. Thiemermann, *Endothelin-1 stimulates the biosynthesis of tumour necrosis factor in macrophages: ET-receptors, signal transduction and inhibition by dexamethasone*. Journal of Physiology & Pharmacology, 1997. **48**(4): p. 675-88.
677. Ruhl, R., A. Hanel, A.L. Garcia, A. Dahten, U. Herz, F.J. Schweigert, and M. Worm, *Role of vitamin A elimination or supplementation diets during postnatal development on the allergic sensitisation in mice*. Mol Nutr Food Res, 2007. **51**(9): p. 1173-81.
678. Ryu, O.H., J. Lee, K.W. Lee, H.Y. Kim, J.A. Seo, S.G. Kim, N.H. Kim, S.H. Baik, D.S. Choi, and K.M. Choi, *Effects of green tea consumption on inflammation, insulin resistance and pulse wave velocity in type 2 diabetes patients*. Diabetes Research & Clinical Practice, 2006. **71**(3): p. 356-8.
679. Sabat, R., I. Kolleck, W. Witt, H. Volk, P. Sinha, and B. Rustow, *Immunological dysregulation of lung cells in response to vitamin E deficiency*. Free Radical Biology & Medicine, 2001. **30**(10): p. 1145-53.
680. Sacanella, E., M. Vazquez-Agell, M.P. Mena, E. Antunez, J. Fernandez-Sola, J.M. Nicolas, R.M. Lamuela-Raventos, E. Ros, and R. Estruch, *Down-regulation of adhesion molecules and other inflammatory biomarkers after moderate wine consumption in healthy women: a randomized trial*. American Journal of Clinical Nutrition, 2007. **86**(5): p. 1463-9.
681. Safir, N., A. Wendel, R. Saile, and L. Chabraoui, *The effect of selenium on immune functions of J774.1 cells*. Clinical Chemistry & Laboratory Medicine, 2003. **41**(8): p. 1005-11.
682. Saibeni, S., M. Cattaneo, M. Vecchi, M.L. Zighetti, A. Lecchi, R. Lombardi, G. Meucci, L. Spina, and R. de Franchis, *Low vitamin B(6) plasma levels, a risk factor for thrombosis, in inflammatory bowel disease: role of inflammation and correlation with acute phase reactants*. American Journal of Gastroenterology, 2003. **98**(1): p. 112-7.
683. Saifullah, A., B.A. Watkins, C. Saha, Y. Li, S.M. Moe, and A.N. Friedman, *Oral fish oil supplementation raises blood omega-3 levels and lowers C-reactive protein in haemodialysis patients a pilot study*. Nephrol Dial Transplant, 2007. **22**(12): p. 3561-7.
684. Sakaguchi, S., Y. Iizuka, S. Furusawa, M. Ishikawa, S. Satoh, and M. Takayanagi, *Role of Zn(2+) in oxidative stress caused by endotoxin challenge*. European Journal of Pharmacology, 2002. **451**(3): p. 309-16.

685. Sakai, T., M. Kogiso, K. Mitsuya, T. Komatsu, and S. Yamamoto, *Genistein enhances antigen-specific cytokine production in female DO11.10 transgenic mice*. Journal of Nutritional Science & Vitaminology, 2006. **52**(5): p. 327-32.
686. Sakai, T., M. Kogiso, K. Mitsuya, T. Komatsu, and S. Yamamoto, *Genistein suppresses development of spontaneous atopic-like dermatitis in NC/Nga mice*. Journal of Nutritional Science & Vitaminology, 2006. **52**(4): p. 293-6.
687. Sakamoto, W., K. Fujie, S. Isomura, M. Kaga, T. Kohgo, N. Yamada, and J. Nishihira, *Secretion of macrophage migration inhibitory factor differs from interleukin-6 in hydrogen peroxide- and LPS-stimulated human fibroblasts*. International Immunopharmacology, 2002. **2**(8): p. 1123-31.
688. Sakamoto, W., H. Isomura, K. Fujie, K. Takahashi, K. Nakao, and H. Izumi, *Relationship of coffee consumption with risk factors of atherosclerosis in rats*. Annals of Nutrition & Metabolism, 2005. **49**(3): p. 149-54.
689. Sakamoto, W., J. Nishihira, K. Fujie, S. Mizuno, M. Ozaki, and S. Yukawa, *Coffee and fitness-coffee suppresses lipopolysaccharide-induced liver injury in rats*. Journal of Nutritional Science & Vitaminology, 2000. **46**(6): p. 316-20.
690. Sakurai, T., T. Matsui, T. Yao, Y. Takagi, F. Hirai, K. Aoyagi, and M. Okada, *Short-term efficacy of enteral nutrition in the treatment of active Crohn's disease: a randomized, controlled trial comparing nutrient formulas*. Jpen: Journal of Parenteral & Enteral Nutrition, 2002. **26**(2): p. 98-103.
691. Salman, H., M. Bergman, H. Bessler, I. Punsky, and M. Djaldetti, *Effect of a garlic derivative (alliin) on peripheral blood cell immune responses*. International Journal of Immunopharmacology, 1999. **21**(9): p. 589-97.
692. Salmenpera, P., S. Hamalainen, M. Hukkanen, and E. Kankuri, *Interferon-gamma induces C/EBP beta expression and activity through MEK/ERK and p38 in T84 colon epithelial cells*. American Journal of Physiology - Cell Physiology, 2003. **284**(5): p. C1133-9.
693. Sanders, T.A., K. Gleason, B. Griffin, and G.J. Miller, *Influence of an algal triacylglycerol containing docosahexaenoic acid (22 : 6n-3) and docosapentaenoic acid (22 : 5n-6) on cardiovascular risk factors in healthy men and women*. Br J Nutr, 2006. **95**(3): p. 525-31.
694. Sasaki, R., N. Nishimura, H. Hoshino, Y. Isa, M. Kadowaki, T. Ichi, A. Tanaka, S. Nishiumi, I. Fukuda, H. Ashida, et al., *Cyanidin 3-glucoside ameliorates hyperglycemia and insulin sensitivity due to downregulation of retinol binding protein 4 expression in diabetic mice*. Biochemical Pharmacology, 2007. **74**(11): p. 1619-27.
695. Sato, K., H. Arai, A. Mizuno, M. Fukaya, T. Sato, M. Koganei, H. Sasaki, H. Yamamoto, Y. Taketani, T. Doi, et al., *Dietary palatinose and oleic acid ameliorate disorders of glucose and lipid metabolism in Zucker fatty rats*. Journal of Nutrition, 2007. **137**(8): p. 1908-15.
696. Sato, K., Y. Dohi, M. Kojima, K. Miyagawa, H. Takase, E. Katada, and S. Suzuki, *Effects of ascorbic acid on ambulatory blood pressure in elderly patients with refractory hypertension*. Arzneimittel-Forschung, 2006. **56**(7): p. 535-40.
697. Sato, Y., H. Akiyama, H. Sukanuma, T. Watanabe, M.H. Nagaoka, T. Inakuma, Y. Goda, and T. Maitani, *The feeding of beta-carotene down-regulates serum IgE levels and*

- inhibits the type I allergic response in mice*. Biological & Pharmaceutical Bulletin, 2004. **27**(7): p. 978-84.
698. Satoh, N., A. Shimatsu, K. Kotani, N. Sakane, K. Yamada, T. Suganami, H. Kuzuya, and Y. Ogawa, *Purified eicosapentaenoic acid reduces small dense LDL, remnant lipoprotein particles, and C-reactive protein in metabolic syndrome*. Diabetes Care, 2007. **30**(1): p. 144-6.
699. Sattar, N., H.R. Scott, D.C. McMillan, D. Talwar, D.S. O'Reilly, and G.S. Fell, *Acute-phase reactants and plasma trace element concentrations in non-small cell lung cancer patients and controls*. Nutrition & Cancer, 1997. **28**(3): p. 308-12.
700. Scaccabarozzi, A., P. Arosio, G. Weiss, L. Valenti, P. Dongiovanni, A.L. Fracanzani, M. Mattioli, S. Levi, G. Fiorelli, and S. Fargion, *Relationship between TNF-alpha and iron metabolism in differentiating human monocytic THP-1 cells*. British Journal of Haematology, 2000. **110**(4): p. 978-84.
701. Scalabrino, G., M.M. Corsi, D. Veber, F.R. Buccellato, G. Pravettoni, A. Manfredi, and P. Magni, *Cobalamin (vitamin B(12)) positively regulates interleukin-6 levels in rat cerebrospinal fluid*. Journal of Neuroimmunology, 2002. **127**(1-2): p. 37-43.
702. Schleithoff, S.S., A. Zittermann, G. Tenderich, H.K. Berthold, P. Stehle, and R. Koerfer, *Vitamin D supplementation improves cytokine profiles in patients with congestive heart failure: a double-blind, randomized, placebo-controlled trial*. Am J Clin Nutr, 2006. **83**(4): p. 754-9.
703. Schmal, H., B.J. Czermak, A.B. Lentsch, N.M. Bless, B. Beck-Schimmer, H.P. Friedl, and P.A. Ward, *Soluble ICAM-1 activates lung macrophages and enhances lung injury*. Journal of Immunology, 1998. **161**(7): p. 3685-93.
704. Schubert, R., R. Kitz, C. Beermann, M.A. Rose, P.C. Baer, S. Zielen, and H. Boehles, *Influence of low-dose polyunsaturated fatty acids supplementation on the inflammatory response of healthy adults*. Nutrition, 2007. **23**(10): p. 724-30.
705. Schultze, R.L., A. Gangopadhyay, O. Cay, D. Lazure, and P. Thomas, *Tyrosine kinase activation in LPS stimulated rat Kupffer cells*. Cell Biochem Biophys, 1999. **30**(2): p. 287-301.
706. Schwager, J. and J. Schulze, *Modulation of interleukin production by ascorbic acid*. Veterinary Immunology & Immunopathology, 1998. **64**(1): p. 45-57.
707. Sconocchia, G., L. Campagnano, D. Adorno, A. Iacona, N.Y. Cococchetta, V. Boffo, S. Amadori, and C.U. Casciani, *CD44 ligation on peripheral blood polymorphonuclear cells induces interleukin-6 production*. Blood, 2001. **97**(11): p. 3621-7.
708. Scuderi, P., *Differential effects of copper and zinc on human peripheral blood monocyte cytokine secretion*. Cellular Immunology, 1990. **126**(2): p. 391-405.
709. Seddon, J.M., G. Gensler, M.L. Klein, and R.C. Milton, *C-reactive protein and homocysteine are associated with dietary and behavioral risk factors for age-related macular degeneration*. Nutrition, 2006. **22**(4): p. 441-3.
710. See, R.H. and A.W. Chow, *Staphylococcal toxic shock syndrome toxin 1-induced tumor necrosis factor alpha and interleukin-1 beta secretion by human peripheral blood monocytes and T lymphocytes is differentially suppressed by protein kinase inhibitors*. Infection & Immunity, 1992. **60**(8): p. 3456-9.

711. Sehirli, O., A. Sakarcan, A. Velioglu-Ogunc, S. Cetinel, N. Gedik, B.C. Yegen, and G. Sener, *Resveratrol improves ifosfamide-induced Fanconi syndrome in rats*. Toxicology & Applied Pharmacology, 2007. **222**(1): p. 33-41.
712. Sener, G., H.Z. Toklu, A.O. Sehirli, A. Velioglu-Ogunc, S. Cetinel, and N. Gedik, *Protective effects of resveratrol against acetaminophen-induced toxicity in mice*. Hepatol Res, 2006. **35**(1): p. 62-8.
713. Sener, G., N. Topaloglu, A.O. Sehirli, F. Ercan, and N. Gedik, *Resveratrol alleviates bleomycin-induced lung injury in rats*. Pulmonary Pharmacology & Therapeutics, 2007. **20**(6): p. 642-9.
714. Senturk, N., G.C. Keles, F.F. Kaymaz, L. Yildiz, G. Acikgoz, and A.Y. Turanli, *The role of ascorbic acid on collagen structure and levels of serum interleukin-6 and tumour necrosis factor-alpha in experimental lathyrism*. Clinical & Experimental Dermatology, 2004. **29**(2): p. 168-75.
715. Seo, J.Y., H. Kim, J.T. Seo, and K.H. Kim, *Oxidative stress induced cytokine production in isolated rat pancreatic acinar cells: effects of small-molecule antioxidants*. Pharmacology, 2002. **64**(2): p. 63-70.
716. Serafin-Lopez, J., R. Chacon-Salinas, S. Munoz-Cruz, J.A. Enciso-Moreno, S.A. Estrada-Parra, and I. Estrada-Garcia, *The effect of iron on the expression of cytokines in macrophages infected with Mycobacterium tuberculosis*. Scandinavian Journal of Immunology, 2004. **60**(4): p. 329-37.
717. Serwin, A.B., W. Wasowicz, and B. Chodyncka, *Selenium supplementation, soluble tumor necrosis factor-alpha receptor type 1, and C-reactive protein during psoriasis therapy with narrowband ultraviolet B*. Nutrition, 2006. **22**(9): p. 860-4.
718. Sethi, G. and A. Sodhi, *In vitro activation of murine peritoneal macrophages by ultraviolet B radiation: upregulation of CD18, production of NO, proinflammatory cytokines and a signal transduction pathway*. Molecular Immunology, 2004. **40**(18): p. 1315-23.
719. Shahbakhti, H., R.E. Watson, R.M. Azurdia, C.Z. Ferreira, M. Garmyn, and L.E. Rhodes, *Influence of eicosapentaenoic acid, an omega-3 fatty acid, on ultraviolet-B generation of prostaglandin-E2 and proinflammatory cytokines interleukin-1 beta, tumor necrosis factor-alpha, interleukin-6 and interleukin-8 in human skin in vivo*. Photochem Photobiol, 2004. **80**(2): p. 231-5.
720. Shames, B.D., C.H. Selzman, E.J. Pulido, X. Meng, D.R. Meldrum, R.C. McIntyre, Jr., A.H. Harken, and A. Banerjee, *LPS-Induced NF-kappaB activation and TNF-alpha release in human monocytes are protein tyrosine kinase dependent and protein kinase C independent*. Journal of Surgical Research, 1999. **83**(1): p. 69-74.
721. Sharma, S., K. Chopra, and S.K. Kulkarni, *Effect of insulin and its combination with resveratrol or curcumin in attenuation of diabetic neuropathic pain: participation of nitric oxide and TNF-alpha*. Phytotherapy Research, 2007. **21**(3): p. 278-83.
722. Sharma, S., K. Chopra, S.K. Kulkarni, and J.N. Agrewala, *Resveratrol and curcumin suppress immune response through CD28/CTLA-4 and CD80 co-stimulatory pathway*. Clinical & Experimental Immunology, 2007. **147**(1): p. 155-63.

723. Sharma, S., S.K. Kulkarni, J.N. Agrewala, and K. Chopra, *Curcumin attenuates thermal hyperalgesia in a diabetic mouse model of neuropathic pain*. *European Journal of Pharmacology*, 2006. **536**(3): p. 256-61.
724. Sharma, S., S.K. Kulkarni, and K. Chopra, *Effect of resveratrol, a polyphenolic phytoalexin, on thermal hyperalgesia in a mouse model of diabetic neuropathic pain*. *Fundamental & Clinical Pharmacology*, 2007. **21**(1): p. 89-94.
725. She, H., S. Xiong, M. Lin, E. Zandi, C. Giulivi, and H. Tsukamoto, *Iron activates NF-kappaB in Kupffer cells*. *American Journal of Physiology - Gastrointestinal & Liver Physiology*, 2002. **283**(3): p. G719-26.
726. Shen, K.-P., Y.-C. Lo, R.-C. Yang, H.-W. Liu, I.-J. Chen, and B.-N. Wu, *Antioxidant eugenosedin-A protects against lipopolysaccharide-induced hypotension, hyperglycaemia and cytokine immunoreactivity in rats and mice*. *Journal of Pharmacy & Pharmacology*, 2005. **57**(1): p. 117-25.
727. Shi, H.N., K.G. Koski, M.M. Stevenson, and M.E. Scott, *Zinc deficiency and energy restriction modify immune responses in mice during both primary and challenge infection with *Heligmosomoides polygyrus* (Nematoda)*. *Parasite Immunology*, 1997. **19**(8): p. 363-73.
728. Shi, H.N., M.E. Scott, M.M. Stevenson, and K.G. Koski, *Zinc deficiency impairs T cell function in mice with primary infection of *Heligmosomoides polygyrus* (Nematoda)*. *Parasite Immunology*, 1994. **16**(7): p. 339-50.
729. Shi, H.N., M.E. Scott, M.M. Stevenson, and K.G. Koski, *Energy restriction and zinc deficiency impair the functions of murine T cells and antigen-presenting cells during gastrointestinal nematode infection*. *Journal of Nutrition*, 1998. **128**(1): p. 20-7.
730. Shi, Y. and J.J. Pestka, *Attenuation of mycotoxin-induced IgA nephropathy by eicosapentaenoic acid in the mouse: dose response and relation to IL-6 expression*. *Journal of Nutritional Biochemistry*, 2006. **17**(10): p. 697-706.
731. Shida, J., M.C. Trindade, S.B. Goodman, D.J. Schurman, and R.L. Smith, *Induction of interleukin-6 release in human osteoblast-like cells exposed to titanium particles in vitro*. *Calcified Tissue International*, 2000. **67**(2): p. 151-5.
732. Shin, H.Y., C.S. Lee, H.J. Chae, H.R. Kim, S.H. Baek, N.H. An, and M.H. Kim, *Inhibitory effect of anaphylactic shock by caffeine in rats*. *International Journal of Immunopharmacology*, 2000. **22**(6): p. 411-8.
733. Siddiqui, A.M., X. Cui, R. Wu, W. Dong, M. Zhou, M. Hu, H.H. Simms, and P. Wang, *The anti-inflammatory effect of curcumin in an experimental model of sepsis is mediated by up-regulation of peroxisome proliferator-activated receptor-gamma*. *Crit Care Med*, 2006. **34**(7): p. 1874-82.
734. Sierksma, A., M.S. van der Gaag, C. Klufft, and H.F. Hendriks, *Moderate alcohol consumption reduces plasma C-reactive protein and fibrinogen levels; a randomized, diet-controlled intervention study*. *Eur J Clin Nutr*, 2002. **56**(11): p. 1130-6.
735. Sijben, J.W., J.W. Schrama, H.K. Parmentier, J.J. van der Poel, and K.C. Klasing, *Effects of dietary polyunsaturated fatty acids on in vivo splenic cytokine mRNA expression in layer chicks immunized with *Salmonella typhimurium* lipopolysaccharide*. *Poultry Science*, 2001. **80**(8): p. 1164-70.

736. Singh, I., A.H. Turner, A.J. Sinclair, D. Li, and J.A. Hawley, *Effects of gamma-tocopherol supplementation on thrombotic risk factors*. *Asia Pac J Clin Nutr*, 2007. **16**(3): p. 422-8.
737. Singh, N.P., V.L. Hegde, L.J. Hofseth, M. Nagarkatti, and P. Nagarkatti, *Resveratrol (trans-3,5,4'-trihydroxystilbene) ameliorates experimental allergic encephalomyelitis, primarily via induction of apoptosis in T cells involving activation of aryl hydrocarbon receptor and estrogen receptor*. *Molecular Pharmacology*, 2007. **72**(6): p. 1508-21.
738. Singh, U., J. Tabibian, S.K. Venugopal, S. Devaraj, and I. Jialal, *Development of an in vitro screening assay to test the antiinflammatory properties of dietary supplements and pharmacologic agents*. *Clin Chem*, 2005. **51**(12): p. 2252-6.
739. Sipahi, T., N. Akar, N. Dincer, Y. Egin, and S. Cin, *Serum interleukin-2 and interleukin-6 levels in zinc deficiency*. *Journal of Tropical Pediatrics*, 2001. **47**(2): p. 120-2.
740. Sipahi, T., N. Akar, Y. Egin, and S. Cin, *Serum interleukin-2 and interleukin-6 levels in iron deficiency anemia*. *Pediatric Hematology & Oncology*, 1998. **15**(1): p. 69-73.
741. Sipos, W., J.C. Duvigneau, F. Schmoll, B. Exel, G. Hofbauer, G. Baravalle, R.T. Hartl, M. Dobretsberger, and P. Pietschmann, *Characterization of the cytokine pattern of porcine bone marrow-derived cells treated with 1alpha,25(OH)D*. *J Vet Med A Physiol Pathol Clin Med*, 2005. **52**(8): p. 382-7.
742. Sisson, J.H., J.A. Stoner, D.J. Romberger, J.R. Spurzem, T.A. Wyatt, J. Owens-Ream, and D.M. Mannino, *Alcohol intake is associated with altered pulmonary function*. *Alcohol*, 2005. **36**(1): p. 19-30.
743. Skuladottir, I.H., D.H. Petursdottir, and I. Hardardottir, *The effects of omega-3 polyunsaturated fatty acids on TNF-alpha and IL-10 secretion by murine peritoneal cells in vitro*. *Lipids*, 2007. **42**(8): p. 699-706.
744. Slim, R., M. Toborek, L.W. Robertson, and B. Hennig, *Antioxidant protection against PCB-mediated endothelial cell activation*. *Toxicological Sciences*, 1999. **52**(2): p. 232-9.
745. Smith, A., K.B. Madden, K.J.A. Yeung, A. Zhao, J. Elfrey, F. Finkelman, O. Levander, T. Shea-Donohue, and J.F. Urban, Jr., *Deficiencies in selenium and/or vitamin E lower the resistance of mice to Heligmosomoides polygyrus infections*. *Journal of Nutrition*, 2005. **135**(4): p. 830-6.
746. Smith, K.S., C.-L. Lee, J.W. Ridlington, S.W. Leonard, S. Devaraj, and M.G. Traber, *Vitamin E supplementation increases circulating vitamin E metabolites tenfold in end-stage renal disease patients*. *Lipids*, 2003. **38**(8): p. 813-9.
747. Soh, P., E.L. Ferguson, J.E. McKenzie, S. Skeaff, W. Parnell, and R.S. Gibson, *Dietary intakes of 6-24-month-old urban South Island New Zealand children in relation to biochemical iron status*. *Public Health Nutrition*, 2002. **5**(2): p. 339-46.
748. Sokolova, O., N. Heppel, R. Jagerhuber, K.S. Kim, M. Frosch, M. Eigenthaler, and A. Schubert-Unkmeir, *Interaction of Neisseria meningitidis with human brain microvascular endothelial cells: role of MAP- and tyrosine kinases in invasion and inflammatory cytokine release*. *Cellular Microbiology*, 2004. **6**(12): p. 1153-66.
749. Solini, A., E. Santini, and E. Ferrannini, *Effect of short-term folic acid supplementation on insulin sensitivity and inflammatory markers in overweight subjects*. *International Journal of Obesity*, 2006. **30**(8): p. 1197-202.

750. Song, C., B.E. Leonard, and D.F. Horrobin, *Dietary ethyl-eicosapentaenoic acid but not soybean oil reverses central interleukin-1-induced changes in behavior, corticosterone and immune response in rats*. *Stress*, 2004. **7**(1): p. 43-54.
751. Song, C., X. Li, B.E. Leonard, and D.F. Horrobin, *Effects of dietary n-3 or n-6 fatty acids on interleukin-1beta-induced anxiety, stress, and inflammatory responses in rats*. *Journal of Lipid Research*, 2003. **44**(10): p. 1984-91.
752. Song, C., A.G. Phillips, B.E. Leonard, and D.F. Horrobin, *Ethyl-eicosapentaenoic acid ingestion prevents corticosterone-mediated memory impairment induced by central administration of interleukin-1beta in rats*. *Molecular Psychiatry*, 2004. **9**(6): p. 630-8.
753. Song, J.H., J.M. Kim, S.H. Kim, H.J. Kim, J.J. Lee, M.H. Sung, S.Y. Hwang, and T.S. Kim, *Comparison of the gene expression profiles of monocytic versus granulocytic lineages of HL-60 leukemia cell differentiation by DNA microarray analysis*. *Life Sci*, 2003. **73**(13): p. 1705-19.
754. Song, Y., T.Y. Li, R.M. van Dam, J.E. Manson, and F.B. Hu, *Magnesium intake and plasma concentrations of markers of systemic inflammation and endothelial dysfunction in women*. *American Journal of Clinical Nutrition*, 2007. **85**(4): p. 1068-74.
755. Song, Y., P.M. Ridker, J.E. Manson, N.R. Cook, J.E. Buring, and S. Liu, *Magnesium intake, C-reactive protein, and the prevalence of metabolic syndrome in middle-aged and older U.S. women*. *Diabetes Care*, 2005. **28**(6): p. 1438-44.
756. Song, Y.-M. and M.-D. Chen, *Zinc supplementation attenuates thioacetamide-induced liver injury and hyperglycemia in mice*. *Biological Trace Element Research*, 2003. **92**(2): p. 173-80.
757. Sorensen, L.B., A. Raben, S. Stender, and A. Astrup, *Effect of sucrose on inflammatory markers in overweight humans*. *American Journal of Clinical Nutrition*, 2005. **82**(2): p. 421-7.
758. Soyland, E., T. Lea, B. Sandstad, and A. Drevon, *Dietary supplementation with very long-chain n-3 fatty acids in man decreases expression of the interleukin-2 receptor (CD25) on mitogen-stimulated lymphocytes from patients with inflammatory skin diseases*. *European Journal of Clinical Investigation*, 1994. **24**(4): p. 236-42.
759. Spoelstra-de, M.A.M.E., C.B. Brouwer, F. Terheggen, J.M. Bollen, C.D.A. Stehouwer, and Y.M. Smulders, *No effect of folic acid on markers of endothelial dysfunction or inflammation in patients with type 2 diabetes mellitus and mild hyperhomocysteinaemia*. *Netherlands Journal of Medicine*, 2004. **62**(7): p. 246-53.
760. Stapleton, P.P., J. Fujita, E.M. Murphy, H.A. Naama, and J.M. Daly, *The influence of restricted calorie intake on peritoneal macrophage function*. *Nutrition*, 2001. **17**(1): p. 41-5.
761. Stephensen, C.B., L.M. Franchi, H. Hernandez, M. Campos, A. Colarossi, R.H. Gilman, and J.O. Alvarez, *Assessment of vitamin A status with the relative-dose-response test in Peruvian children recovering from pneumonia*. *American Journal of Clinical Nutrition*, 2002. **76**(6): p. 1351-7.
762. Stephensen, C.B. and G. Gildengorin, *Serum retinol, the acute phase response, and the apparent misclassification of vitamin A status in the third National Health and Nutrition Examination Survey*. *Am J Clin Nutr*, 2000. **72**(5): p. 1170-8.

763. Stephensen, C.B., X. Jiang, and T. Freytag, *Vitamin A deficiency increases the in vivo development of IL-10-positive Th2 cells and decreases development of Th1 cells in mice*. *Journal of Nutrition*, 2004. **134**(10): p. 2660-6.
764. Steptoe, A., E.L. Gibson, R. Vuononvirta, M. Hamer, J. Wardle, J.A. Rycroft, J.F. Martin, and J.D. Erusalimsky, *The effects of chronic tea intake on platelet activation and inflammation: a double-blind placebo controlled trial*. *Atherosclerosis*, 2007. **193**(2): p. 277-82.
765. Strand, T.A., R.K. Adhikari, R.K. Chandyo, P.R. Sharma, and H. Sommerfelt, *Predictors of plasma zinc concentrations in children with acute diarrhea*. *American Journal of Clinical Nutrition*, 2004. **79**(3): p. 451-6.
766. Strasser, E.-M., B. Wessner, N. Manhart, and E. Roth, *The relationship between the anti-inflammatory effects of curcumin and cellular glutathione content in myelomonocytic cells*. *Biochemical Pharmacology*, 2005. **70**(4): p. 552-9.
767. Suganuma, M., E. Sueoka, N. Sueoka, S. Okabe, and H. Fujiki, *Mechanisms of cancer prevention by tea polyphenols based on inhibition of TNF-alpha expression*. *Biofactors*, 2000. **13**(1-4): p. 67-72.
768. Suh, K.S., G. Koh, C.Y. Park, J.T. Woo, S.W. Kim, J.W. Kim, I.K. Park, and Y.S. Kim, *Soybean isoflavones inhibit tumor necrosis factor-alpha-induced apoptosis and the production of interleukin-6 and prostaglandin E2 in osteoblastic cells*. *Phytochemistry*, 2003. **63**(2): p. 209-15.
769. Sun, C., Y. Hu, X. Liu, T. Wu, Y. Wang, W. He, and W. Wei, *Resveratrol downregulates the constitutive activation of nuclear factor-kappaB in multiple myeloma cells, leading to suppression of proliferation and invasion, arrest of cell cycle, and induction of apoptosis*. *Cancer Genet Cytogenet*, 2006. **165**(1): p. 9-19.
770. Sundrarjun, T., S. Komindr, N. Archararit, W. Dahlan, O. Puchaiwatananon, S. Angthararak, U. Udomsuppayakul, and S. Chuncharunee, *Effects of n-3 fatty acids on serum interleukin-6, tumour necrosis factor-alpha and soluble tumour necrosis factor receptor p55 in active rheumatoid arthritis*. *Journal of International Medical Research*, 2004. **32**(5): p. 443-54.
771. Sung, H., W.-K. Min, W. Lee, S. Chun, H. Park, Y.-W. Lee, S. Jang, and D.-H. Lee, *The effects of green tea ingestion over four weeks on atherosclerotic markers*. *Annals of Clinical Biochemistry*, 2005. **42**(Pt 4): p. 292-7.
772. Surh, Y.J., K.K. Park, K.S. Chun, L.J. Lee, E. Lee, and S.S. Lee, *Anti-tumor-promoting activities of selected pungent phenolic substances present in ginger*. *Journal of Environmental Pathology, Toxicology & Oncology*, 1999. **18**(2): p. 131-9.
773. Suzuki, T., Y. Sano, C. Sotozono, and S. Kinoshita, *Regulatory effects of 1alpha,25-dihydroxyvitamin D(3) on cytokine production by human corneal epithelial cells*. *Current Eye Research*, 2000. **20**(2): p. 127-30.
774. Svensson, U., E. Holst, and R. Sundler, *Cyclosporin-sensitive expression of cytokine mRNA in mouse macrophages responding to bacteria*. *Molecular Immunology*, 1995. **32**(2): p. 157-65.
775. Szabo, G., A. Dolganiuc, P. Mandrekar, and B. White, *Inhibition of antigen-presenting cell functions by alcohol: implications for hepatitis C virus infection*. *Alcohol*, 2004. **33**(3): p. 241-9.

776. Szabo, G., P. Mandrekar, and D. Catalano, *Inhibition of superantigen-induced T cell proliferation and monocyte IL-1 beta, TNF-alpha, and IL-6 production by acute ethanol treatment*. Journal of Leukocyte Biology, 1995. **58**(3): p. 342-50.
777. Szabo, G., P. Mandrekar, A. Dolganiuc, D. Catalano, and K. Kodys, *Reduced alloreactive T-cell activation after alcohol intake is due to impaired monocyte accessory cell function and correlates with elevated IL-10, IL-13, and decreased IFN-gamma levels*. Alcoholism: Clinical & Experimental Research, 2001. **25**(12): p. 1766-72.
778. Takacs, P., K.L. Green, A. Nikaio, and S.W. Kauma, *Increased vascular endothelial cell production of interleukin-6 in severe preeclampsia*. American Journal of Obstetrics & Gynecology, 2003. **188**(3): p. 740-4.
779. Takahashi, K., Y. Nakayama, H. Horiuchi, T. Ohta, K. Komoriya, H. Ohmori, and T. Kamimura, *Human neutrophils express messenger RNA of vitamin D receptor and respond to 1alpha,25-dihydroxyvitamin D3*. Immunopharmacology & Immunotoxicology, 2002. **24**(3): p. 335-47.
780. Takekawa, S., T. Matsui, and Y. Arakawa, *The protective effect of the soybean polyphenol genistein against stress-induced gastric mucosal lesions in rats, and its hormonal mechanisms*. Journal of Nutritional Science & Vitaminology, 2006. **52**(4): p. 274-80.
781. Takii, T., A. Ito, S. Kawashima, A. Ninomiya, T. Matsumura, H. Hayashi, and K. Onozaki, *Tyrosine kinase is essential for the constitutive expression of type I interleukin-1 receptor in human fibroblast cells*. European Cytokine Network, 1999. **10**(2): p. 237-46.
782. Talwar, D., T.K. Ha, H.R. Scott, J. Cooney, G.S. Fell, D.S. O'Reilly, M.E. Lean, and D.C. McMillan, *Effect of inflammation on measures of antioxidant status in patients with non-small cell lung cancer*. American Journal of Clinical Nutrition, 1997. **66**(5): p. 1283-5.
783. Tappia, P.S., W.J. Man, and R.F. Grimble, *Influence of unsaturated fatty acids on the production of tumour necrosis factor and interleukin-6 by rat peritoneal macrophages*. Molecular & Cellular Biochemistry, 1995. **143**(2): p. 89-98.
784. Tarp, U., K. Overvad, J.C. Hansen, and E.B. Thorling, *Low selenium level in severe rheumatoid arthritis*. Scandinavian Journal of Rheumatology, 1985. **14**(2): p. 97-101.
785. Tashiro, T., H. Yamamori, K. Takagi, N. Hayashi, K. Furukawa, and N. Nakajima, *n-3 versus n-6 polyunsaturated fatty acids in critical illness*. Nutrition, 1998. **14**(6): p. 551-3.
786. Taylor, P., R. Noriega, C. Farah, M.-J. Abad, M. Arsenak, and R. Apitz, *Ajoene inhibits both primary tumor growth and metastasis of B16/BL6 melanoma cells in C57BL/6 mice*. Cancer Letters, 2006. **239**(2): p. 298-304.
787. Tebbe, B., S. Wu, C.C. Geilen, J. Eberle, V. Kodelja, and C.E. Orfanos, *L-ascorbic acid inhibits UVA-induced lipid peroxidation and secretion of IL-1alpha and IL-6 in cultured human keratinocytes in vitro*. Journal of Investigative Dermatology, 1997. **108**(3): p. 302-6.
788. Theobald, H.E., A.H. Goodall, N. Sattar, D.C. Talbot, P.J. Chowienczyk, and T.A. Sanders, *Low-dose docosahexaenoic acid lowers diastolic blood pressure in middle-aged men and women*. J Nutr, 2007. **137**(4): p. 973-8.

789. Thies, F., E.A. Miles, G. Nebe-von-Caron, J.R. Powell, T.L. Hurst, E.A. Newsholme, and P.C. Calder, *Influence of dietary supplementation with long-chain n-3 or n-6 polyunsaturated fatty acids on blood inflammatory cell populations and functions and on plasma soluble adhesion molecules in healthy adults*. *Lipids*, 2001. **36**(11): p. 1183-93.
790. Thoenes, M., A. Oguchi, S. Nagamia, C.S. Vaccari, R. Hammoud, G.E. Umpierrez, and B.V. Khan, *The effects of extended-release niacin on carotid intimal media thickness, endothelial function and inflammatory markers in patients with the metabolic syndrome*. *Int J Clin Pract*, 2007. **61**(11): p. 1942-8.
791. Thurlow, R.A., P. Winichagoon, T. Pongcharoen, S. Gowachirapant, A. Boonpradern, M.S. Manger, K.B. Bailey, E. Wasantwisut, and R.S. Gibson, *Risk of zinc, iodine and other micronutrient deficiencies among school children in North East Thailand*. *European Journal of Clinical Nutrition*, 2006. **60**(5): p. 623-32.
792. Thurnham, D.I., G.P. McCabe, C.A. Northrop-Clewes, and P. Nestel, *Effects of subclinical infection on plasma retinol concentrations and assessment of prevalence of vitamin A deficiency: meta-analysis*. *Lancet*, 2003. **362**(9401): p. 2052-8.
793. Timms, P.M., N. Mannan, G.A. Hitman, K. Noonan, P.G. Mills, D. Syndercombe-Court, E. Aganna, C.P. Price, and B.J. Boucher, *Circulating MMP9, vitamin D and variation in the TIMP-1 response with VDR genotype: mechanisms for inflammatory damage in chronic disorders?* *Qjm*, 2002. **95**(12): p. 787-96.
794. Title, L.M., E. Ur, K. Giddens, M.J. McQueen, and B.A. Nassar, *Folic acid improves endothelial dysfunction in type 2 diabetes--an effect independent of homocysteine-lowering*. *Vascular Medicine*, 2006. **11**(2): p. 101-9.
795. Toborek, M., Y.W. Lee, R. Garrido, S. Kaiser, and B. Hennig, *Unsaturated fatty acids selectively induce an inflammatory environment in human endothelial cells*. *Am J Clin Nutr*, 2002. **75**(1): p. 119-25.
796. Toepfer-Berg, T.L., J. Escobar, W.G. Van Alstine, D.H. Baker, J. Salak-Johnson, and R.W. Johnson, *Vitamin E supplementation does not mitigate the acute morbidity effects of porcine reproductive and respiratory syndrome virus in nursery pigs*. *Journal of Animal Science*, 2004. **82**(7): p. 1942-51.
797. Toft, A.D., M. Thorn, K. Ostrowski, S. Asp, K. Moller, S. Iversen, C. Hermann, S.R. Sondergaard, and B.K. Pedersen, *N-3 polyunsaturated fatty acids do not affect cytokine response to strenuous exercise*. *Journal of Applied Physiology*, 2000. **89**(6): p. 2401-6.
798. Tomobe, Y.I., K. Morizawa, M. Tsuchida, H. Hibino, Y. Nakano, and Y. Tanaka, *Dietary docosahexaenoic acid suppresses inflammation and immunoresponses in contact hypersensitivity reaction in mice*. *Lipids*, 2000. **35**(1): p. 61-9.
799. Torii, A., M. Miyake, M. Morishita, K. Ito, S. Torii, and T. Sakamoto, *Vitamin A reduces lung granulomatous inflammation with eosinophilic and neutrophilic infiltration in Sephadex-treated rats*. *European Journal of Pharmacology*, 2004. **497**(3): p. 335-42.
800. Tousoulis, D., C. Antoniades, C. Tentolouris, C. Tsioufis, M. Toutouza, P. Toutouzas, and C. Stefanadis, *Effects of combined administration of vitamins C and E on reactive hyperemia and inflammatory process in chronic smokers*. *Atherosclerosis*, 2003. **170**(2): p. 261-7.
801. Trakatellis, A., A. Dimitriadou, M. Exindari, J. Scountzou, G. Koliakos, D. Christodoulou, N. Malissiovas, A. Antoniadis, and T. Polyzoni, *Effect of pyridoxine*

- deficiency on immunological phenomena*. Postgraduate Medical Journal, 1992. **68 Suppl 1**: p. S70-7.
802. Trebble, T., N.K. Arden, M.A. Stroud, S.A. Wootton, G.C. Burdge, E.A. Miles, A.B. Ballinger, R.L. Thompson, and P.C. Calder, *Inhibition of tumour necrosis factor-alpha and interleukin 6 production by mononuclear cells following dietary fish-oil supplementation in healthy men and response to antioxidant co-supplementation*. British Journal of Nutrition, 2003. **90**(2): p. 405-12.
803. Tripathi, S., K.G. Maier, D. Bruch, and D.S. Kittur, *Effect of 6-gingerol on pro-inflammatory cytokine production and costimulatory molecule expression in murine peritoneal macrophages*. Journal of Surgical Research, 2007. **138**(2): p. 209-13.
804. Tsao, S.M., C.C. Hsu, and M.C. Yin, *Garlic extract and two diallyl sulphides inhibit methicillin-resistant Staphylococcus aureus infection in BALB/cA mice*. J Antimicrob Chemother, 2003. **52**(6): p. 974-80.
805. Tsao, S.-M., W.-H. Liu, and M.-C. Yin, *Two diallyl sulphides derived from garlic inhibit methicillin-resistant Staphylococcus aureus infection in diabetic mice*. Journal of Medical Microbiology, 2007. **56**(Pt 6): p. 803-8.
806. Tse, A.K., C.K. Wan, X.L. Shen, G.Y. Zhu, H.Y. Cheung, M. Yang, and W.F. Fong, *1,25-dihydroxyvitamin D3 induces biphasic NF-kappaB responses during HL-60 leukemia cells differentiation through protein induction and PI3K/Akt-dependent phosphorylation/degradation of IkappaB*. Exp Cell Res, 2007. **313**(8): p. 1722-34.
807. Tsuda, T., F. Horio, K. Uchida, H. Aoki, and T. Osawa, *Dietary cyanidin 3-O-beta-D-glucoside-rich purple corn color prevents obesity and ameliorates hyperglycemia in mice*. Journal of Nutrition, 2003. **133**(7): p. 2125-30.
808. Tsuda, T., Y. Ueno, T. Yoshikawa, H. Kojo, and T. Osawa, *Microarray profiling of gene expression in human adipocytes in response to anthocyanins*. Biochemical Pharmacology, 2006. **71**(8): p. 1184-97.
809. Tsukamoto, H., S. Cheng, and W.S. Blaner, *Effects of dietary polyunsaturated fat on ethanol-induced Ito cell activation*. American Journal of Physiology, 1996. **270**(4 Pt 1): p. G581-6.
810. Turek, J.J., I.A. Schoenlein, L.K. Clark, and W.G. Van Alstine, *Dietary polyunsaturated fatty acid effects on immune cells of the porcine lung*. Journal of Leukocyte Biology, 1994. **56**(5): p. 599-604.
811. Ueda, H., C. Yamazaki, and M. Yamazaki, *Luteolin as an anti-inflammatory and anti-allergic constituent of Perilla frutescens*. Biological & Pharmaceutical Bulletin, 2002. **25**(9): p. 1197-202.
812. Ueda, H., C. Yamazaki, and M. Yamazaki, *A hydroxyl group of flavonoids affects oral anti-inflammatory activity and inhibition of systemic tumor necrosis factor-alpha production*. Bioscience, Biotechnology & Biochemistry, 2004. **68**(1): p. 119-25.
813. Ukil, A., S. Maity, and P.K. Das, *Protection from experimental colitis by theaflavin-3,3'-digallate correlates with inhibition of IKK and NF-kappaB activation*. British Journal of Pharmacology, 2006. **149**(1): p. 121-31.
814. Um, S.-H., D.-K. Rhee, and S. Pyo, *Involvement of protein kinase C and tyrosin kinase in tumoricidal activation of macrophage induced by Streptococcus pneumoniae type II capsular polysaccharide*. International Immunopharmacology, 2002. **2**(1): p. 129-37.

815. Ungerstedt, J.S., M. Blomback, and T. Soderstrom, *Nicotinamide is a potent inhibitor of proinflammatory cytokines*. Clinical & Experimental Immunology, 2003. **131**(1): p. 48-52.
816. Ungerstedt, J.S., K. Heimersson, T. Soderstrom, and M. Hansson, *Nicotinamide inhibits endotoxin-induced monocyte tissue factor expression*. Journal of Thrombosis & Haemostasis, 2003. **1**(12): p. 2554-60.
817. Upritchard, J.E., W.H. Sutherland, and J.I. Mann, *Effect of supplementation with tomato juice, vitamin E, and vitamin C on LDL oxidation and products of inflammatory activity in type 2 diabetes*. Diabetes Care, 2000. **23**(6): p. 733-8.
818. Utsunomiya, T., S.R. Chavali, W.W. Zhong, and R.A. Forse, *Effects of continuous tube feeding of dietary fat emulsions on eicosanoid production and on fatty acid composition during an acute septic shock in rats*. Biochimica et Biophysica Acta, 1994. **1214**(3): p. 333-9.
819. Uzzo, R.G., P.L. Crispen, K. Golovine, P. Makhov, E.M. Horwitz, and V.M. Kolenko, *Diverse effects of zinc on NF-kappaB and AP-1 transcription factors: implications for prostate cancer progression*. Carcinogenesis, 2006. **27**(10): p. 1980-90.
820. Valtuena, S., D. Del Rio, N. Pellegrini, D. Ardigo, L. Franzini, S. Salvatore, P.M. Piatti, P. Riso, I. Zavaroni, and F. Brighenti, *The total antioxidant capacity of the diet is an independent predictor of plasma beta-carotene*. European Journal of Clinical Nutrition, 2007. **61**(1): p. 69-76.
821. van Doorn, M.B.A., S.M. Espirito Santo, P. Meijer, I.M. Kamerling, R.C. Schoemaker, V. Dirsch, A. Vollmar, T. Haffner, R. Gebhardt, A.F. Cohen, et al., *Effect of garlic powder on C-reactive protein and plasma lipids in overweight and smoking subjects*. American Journal of Clinical Nutrition, 2006. **84**(6): p. 1324-9.
822. van Furth, A.M., E.M. Seijmonsbergen, J.A. Langermans, P.H. van der Meide, and R. van Furth, *Effect of xanthine derivatives and dexamethasone on Streptococcus pneumoniae-stimulated production of tumor necrosis factor alpha, interleukin-1 beta (IL-1 beta), and IL-10 by human leukocytes*. Clinical & Diagnostic Laboratory Immunology, 1995. **2**(6): p. 689-92.
823. van Herpen-Broekmans, W.M.R., I.A.A. Klopping-Ketelaars, M.L. Bots, C. Kluft, H. Princen, H.F.J. Hendriks, L.B.M. Tijburg, G. van Poppel, and A.F.M. Kardinaal, *Serum carotenoids and vitamins in relation to markers of endothelial function and inflammation*. European Journal of Epidemiology, 2004. **19**(10): p. 915-21.
824. van Tits, L.J., P.N. Demacker, J. de Graaf, H.L. Hak-Lemmers, and A.F. Stalenhoef, *alpha-tocopherol supplementation decreases production of superoxide and cytokines by leukocytes ex vivo in both normolipidemic and hypertriglyceridemic individuals*. American Journal of Clinical Nutrition, 2000. **71**(2): p. 458-64.
825. van Tits, L.J.H., E.M.G. Jacobs, D.W. Swinkels, H.L.M. Lemmers, G.M. van der Vleuten, J. de Graaf, and A.F.H. Stalenhoef, *Non-transferrin-bound iron is associated with plasma level of soluble intercellular adhesion molecule-1 but not with in vivo low-density lipoprotein oxidation*. Atherosclerosis, 2007. **194**(1): p. 272-8.
826. Varilek, G.W., F. Yang, E.Y. Lee, W.J. deVilliers, J. Zhong, H.S. Oz, K.F. Westberry, and C.J. McClain, *Green tea polyphenol extract attenuates inflammation in interleukin-2-deficient mice, a model of autoimmunity*. Journal of Nutrition, 2001. **131**(7): p. 2034-9.

827. Vazquez-Agell, M., E. Sacanella, E. Tobias, M. Monagas, E. Antunez, R. Zamora-Ros, C. Andres-Lacueva, R.M. Lamuela-Raventos, J. Fernandez-Sola, J.M. Nicolas, et al., *Inflammatory markers of atherosclerosis are decreased after moderate consumption of cava (sparkling wine) in men with low cardiovascular risk*. Journal of Nutrition, 2007. **137**(10): p. 2279-84.
828. Veaute, C., M.F. Andreoli, A. Racca, A. Bailat, M.V. Scalerandi, C. Bernal, and I. Malan Borel, *Effects of isomeric fatty acids on reproductive parameters in mice*. Am J Reprod Immunol, 2007. **58**(6): p. 487-96.
829. Vega, L., M. Rodriguez-Sosa, E.A. Garcia-Montalvo, L.M. Del Razo, and G. Elizondo, *Non-optimal levels of dietary selenomethionine alter splenocyte response and modify oxidative stress markers in female mice*. Food & Chemical Toxicology, 2007. **45**(7): p. 1147-53.
830. Vega, V.L., R. De Cabo, and A. De Maio, *Age and caloric restriction diets are confounding factors that modify the response to lipopolysaccharide by peritoneal macrophages in C57BL/6 mice*. Shock, 2004. **22**(3): p. 248-53.
831. Vega-Lopez, S., N. Kaul, S. Devaraj, R.Y. Cai, B. German, and I. Jialal, *Supplementation with omega3 polyunsaturated fatty acids and all-rac alpha-tocopherol alone and in combination failed to exert an anti-inflammatory effect in human volunteers*. Metabolism: Clinical & Experimental, 2004. **53**(2): p. 236-40.
832. Venkatraman, J.T. and D. Pendergast, *Effects of the level of dietary fat intake and endurance exercise on plasma cytokines in runners*. Medicine & Science in Sports & Exercise, 1998. **30**(8): p. 1198-204.
833. Venkatraman, J.T., J.A. Rowland, E. Denardin, P.J. Horvath, and D. Pendergast, *Influence of the level of dietary lipid intake and maximal exercise on the immune status in runners*. Medicine & Science in Sports & Exercise, 1997. **29**(3): p. 333-44.
834. Verhamme, P., R. Quarck, H. Hao, M. Knaapen, S. Dymarkowski, H. Bernar, J. Van Cleemput, S. Janssens, J. Vermynen, G. Gabbiani, et al., *Dietary cholesterol withdrawal reduces vascular inflammation and induces coronary plaque stabilization in miniature pigs*. Cardiovasc Res, 2002. **56**(1): p. 135-44.
835. Verlengia, R., R. Gorjao, C.C. Kanunfre, S. Bordin, T.M. de Lima, and R. Curi, *Effect of arachidonic acid on proliferation, cytokines production and pleiotropic genes expression in Jurkat cells--a comparison with oleic acid*. Life Sci, 2003. **73**(23): p. 2939-51.
836. Verlengia, R., R. Gorjao, C.C. Kanunfre, S. Bordin, T.M. de Lima, P. Newsholme, and R. Curi, *Genes regulated by arachidonic and oleic acids in Raji cells*. Lipids, 2003. **38**(11): p. 1157-65.
837. Verlengia, R., R. Gorjao, C.C. Kanunfre, S. Bordin, T. Martins De Lima, E.F. Martins, and R. Curi, *Comparative effects of eicosapentaenoic acid and docosahexaenoic acid on proliferation, cytokine production, and pleiotropic gene expression in Jurkat cells*. J Nutr Biochem, 2004. **15**(11): p. 657-65.
838. Vernet, P., A. Britan, E. Gueux, A. Mazur, and J.R. Drevet, *Dietary magnesium depletion does not promote oxidative stress but targets apical cells within the mouse caput epididymidis*. Biochimica et Biophysica Acta, 2004. **1675**(1-3): p. 32-45.
839. Videla, L.A., G. Tapia, P. Varela, P. Cornejo, J. Guerrero, Y. Israel, and V. Fernandez, *Effects of acute gamma-hexachlorocyclohexane intoxication in relation to the redox*

- regulation of nuclear factor-kappaB, cytokine gene expression, and liver injury in the rat. Antioxidants & Redox Signaling*, 2004. **6**(2): p. 471-80.
840. Vidyarani, M., P. Selvaraj, M.S. Jawahar, and P.R. Narayanan, *I, 25 Dihydroxyvitamin D(3) modulated cytokine response in pulmonary tuberculosis. Cytokine*, 2007.
841. Vignolini, F., F. Nobili, and E. Mengheri, *Involvement of interleukin-1beta in zinc deficiency-induced intestinal damage and beneficial effect of cyclosporine A. Life Sciences*, 1998. **62**(2): p. 131-41.
842. Visseren, F.L.J., M.S.A. Verkerk, T. van der Bruggen, J.J.M. Marx, B.S. van Asbeck, and R.J.A. Diepersloot, *Iron chelation and hydroxyl radical scavenging reduce the inflammatory response of endothelial cells after infection with Chlamydia pneumoniae or influenza A. European Journal of Clinical Investigation*, 2002. **32 Suppl 1**: p. 84-90.
843. Volpato, S., M. Pahor, L. Ferrucci, E.M. Simonsick, J.M. Guralnik, S.B. Kritchevsky, R. Fellin, and T.B. Harris, *Relationship of alcohol intake with inflammatory markers and plasminogen activator inhibitor-1 in well-functioning older adults: the Health, Aging, and Body Composition study. Circulation*, 2004. **109**(5): p. 607-12.
844. von Bulow, V., S. Dubben, G. Engelhardt, S. Hebel, B. Plumakers, H. Heine, L. Rink, and H. Haase, *Zinc-dependent suppression of TNF-alpha production is mediated by protein kinase A-induced inhibition of Raf-1, I kappa B kinase beta, and NF-kappa B. Journal of Immunology*, 2007. **179**(6): p. 4180-6.
845. von Bulow, V., L. Rink, and H. Haase, *Zinc-mediated inhibition of cyclic nucleotide phosphodiesterase activity and expression suppresses TNF-alpha and IL-1 beta production in monocytes by elevation of guanosine 3',5'-cyclic monophosphate. Journal of Immunology*, 2005. **175**(7): p. 4697-705.
846. Vulcano, M., M.F. Rosa, I. Breyer, and M.A. Isturiz, *Hydroxyl radical scavengers inhibit TNF-alpha production in mononuclear cells but not in polymorphonuclear leukocytes. International Journal of Immunopharmacology*, 1998. **20**(12): p. 709-22.
847. Wadsworth, T.L. and D.R. Koop, *Effects of the wine polyphenolics quercetin and resveratrol on pro-inflammatory cytokine expression in RAW 264.7 macrophages. Biochemical Pharmacology*, 1999. **57**(8): p. 941-9.
848. Wadsworth, T.L., T.L. McDonald, and D.R. Koop, *Effects of Ginkgo biloba extract (EGb 761) and quercetin on lipopolysaccharide-induced signaling pathways involved in the release of tumor necrosis factor-alpha. Biochemical Pharmacology*, 2001. **62**(7): p. 963-74.
849. Wagner, J.G., Q. Jiang, J.R. Harkema, B. Illek, D.D. Patel, B.N. Ames, and D.B. Peden, *Ozone enhancement of lower airway allergic inflammation is prevented by gamma-tocopherol. Free Radic Biol Med*, 2007. **43**(8): p. 1176-88.
850. Wahyudi, S. and D. Sargowo, *Green tea polyphenols inhibit oxidized LDL-induced NF-KB activation in human umbilical vein endothelial cells. Acta Medica Indonesiana*, 2007. **39**(2): p. 66-70.
851. Walker, G.J., O. Finlay, H. Griffiths, J. Sylvester, M. Williams, and N.C. Bishop, *Immunoendocrine response to cycling following ingestion of caffeine and carbohydrate. Medicine & Science in Sports & Exercise*, 2007. **39**(9): p. 1554-60.

852. Walston, J., Q. Xue, R.D. Semba, L. Ferrucci, A.R. Cappola, M. Ricks, J. Guralnik, and L.P. Fried, *Serum antioxidants, inflammation, and total mortality in older women*. American Journal of Epidemiology, 2006. **163**(1): p. 18-26.
853. Wang, A.Y., J. Sanderson, M.M. Sea, M. Wang, C.W. Lam, P.K. Li, S.F. Lui, and J. Woo, *Important factors other than dialysis adequacy associated with inadequate dietary protein and energy intakes in patients receiving maintenance peritoneal dialysis*. Am J Clin Nutr, 2003. **77**(4): p. 834-41.
854. Wang, H., Q. Hao, Q.R. Li, X.W. Yan, S. Ye, Y.S. Li, N. Li, and J.S. Li, *Omega-3 polyunsaturated fatty acids affect lipopolysaccharide-induced maturation of dendritic cells through mitogen-activated protein kinases p38*. Nutrition, 2007. **23**(6): p. 474-82.
855. Wang, J. and G. Mazza, *Effects of anthocyanins and other phenolic compounds on the production of tumor necrosis factor alpha in LPS/IFN-gamma-activated RAW 264.7 macrophages*. Journal of Agricultural & Food Chemistry, 2002. **50**(15): p. 4183-9.
856. Wang, J.Y., B. Liang, and R.R. Watson, *Vitamin E supplementation with interferon-gamma administration retards immune dysfunction during murine retrovirus infection*. Journal of Leukocyte Biology, 1995. **58**(6): p. 698-703.
857. Wang, M.J., H.M. Huang, S.J. Hsieh, K.C. Jeng, and J.S. Kuo, *Resveratrol inhibits interleukin-6 production in cortical mixed glial cells under hypoxia/hypoglycemia followed by reoxygenation*. Journal of Neuroimmunology, 2001. **112**(1-2): p. 28-34.
858. Wang, S., N.N. Sun, J. Zhang, R.R. Watson, and M.L. Witten, *Immunomodulatory effects of high-dose alpha-tocopherol acetate on mice subjected to sidestream cigarette smoke*. Toxicology, 2002. **175**(1-3): p. 235-45.
859. Wang, X., S. Chen, G. Ma, M. Ye, and G. Lu, *Genistein protects dopaminergic neurons by inhibiting microglial activation*. Neuroreport, 2005. **16**(3): p. 267-70.
860. Wang, X.L., D.L. Rainwater, M.C. Mahaney, and R. Stocker, *Cosupplementation with vitamin E and coenzyme Q10 reduces circulating markers of inflammation in baboons*. American Journal of Clinical Nutrition, 2004. **80**(3): p. 649-55.
861. Wang, Y., D.S. Huang, C.D. Eskelson, and R.R. Watson, *Long-term dietary vitamin E retards development of retrovirus-induced dysregulation in cytokine production*. Clinical Immunology & Immunopathology, 1994. **72**(1): p. 70-5.
862. Wang, Y., D.S. Huang, B. Liang, and R.R. Watson, *Nutritional status and immune responses in mice with murine AIDS are normalized by vitamin E supplementation*. Journal of Nutrition, 1994. **124**(10): p. 2024-32.
863. Wang, Y., D.S. Huang, and R.R. Watson, *Vitamin E supplementation modulates cytokine production by thymocytes during murine AIDS*. Immunologic Research, 1993. **12**(4): p. 358-66.
864. Wang, Y., D.S. Huang, and R.R. Watson, *Dietary vitamin E modulation of cytokine production by splenocytes and thymocytes from alcohol-fed mice*. Alcoholism: Clinical & Experimental Research, 1994. **18**(2): p. 355-62.
865. Wang, Y., D.S. Huang, S. Wood, and R.R. Watson, *Modulation of immune function and cytokine production by various levels of vitamin E supplementation during murine AIDS*. Immunopharmacology, 1995. **29**(3): p. 225-33.

866. Wang, Y. and R.R. Watson, *Vitamin E supplementation at various levels alters cytokine production by thymocytes during retrovirus infection causing murine AIDS*. *Thymus*, 1994. **22**(3): p. 153-65.
867. Wannamethee, S.G., G.D. Lowe, G. Shaper, P.H. Whincup, A. Rumley, M. Walker, and L. Lennon, *The effects of different alcoholic drinks on lipids, insulin and haemostatic and inflammatory markers in older men*. *Thromb Haemost*, 2003. **90**(6): p. 1080-7.
868. Wannamethee, S.G., G.D.O. Lowe, A. Rumley, K.R. Bruckdorfer, and P.H. Whincup, *Associations of vitamin C status, fruit and vegetable intakes, and markers of inflammation and hemostasis.[see comment]*. *American Journal of Clinical Nutrition*, 2006. **83**(3): p. 567-74; quiz 726-7.
869. Wannamethee, S.G., P.H. Whincup, A. Rumley, and G.D. Lowe, *Inter-relationships of interleukin-6, cardiovascular risk factors and the metabolic syndrome among older men*. *J Thromb Haemost*, 2007. **5**(8): p. 1637-43.
870. Watanabe, S., K. Katagiri, K. Onozaki, N. Hata, Y. Misawa, T. Hamazaki, and H. Okuyama, *Dietary docosahexaenoic acid but not eicosapentaenoic acid suppresses lipopolysaccharide-induced interleukin-1 beta mRNA induction in mouse spleen leukocytes*. *Prostaglandins Leukotrienes & Essential Fatty Acids*, 2000. **62**(3): p. 147-52.
871. Watzl, B., A. Bub, K. Briviba, and G. Rechkemmer, *Acute intake of moderate amounts of red wine or alcohol has no effect on the immune system of healthy men*. *European Journal of Nutrition*, 2002. **41**(6): p. 264-70.
872. Watzl, B., A. Bub, G. Pretzer, S. Roser, S.W. Barth, and G. Rechkemmer, *Daily moderate amounts of red wine or alcohol have no effect on the immune system of healthy men*. *European Journal of Clinical Nutrition*, 2004. **58**(1): p. 40-5.
873. Weatherill, A.R., J.Y. Lee, L. Zhao, D.G. Lemay, H.S. Youn, and D.H. Hwang, *Saturated and polyunsaturated fatty acids reciprocally modulate dendritic cell functions mediated through TLR4*. *Journal of Immunology*, 2005. **174**(9): p. 5390-7.
874. Webel, D.M., D.C. Mahan, R.W. Johnson, and D.H. Baker, *Pretreatment of young pigs with vitamin E attenuates the elevation in plasma interleukin-6 and cortisol caused by a challenge dose of lipopolysaccharide*. *Journal of Nutrition*, 1998. **128**(10): p. 1657-60.
875. Wei, B.L., C.M. Lu, L.T. Tsao, J.P. Wang, and C.N. Lin, *In vitro anti-inflammatory effects of quercetin 3-O-methyl ether and other constituents from Rhamnus species*. *Planta Medica*, 2001. **67**(8): p. 745-7.
876. Weiss, E.P., S.B. Racette, D.T. Villareal, L. Fontana, K. Steger-May, K.B. Schechtman, S. Klein, and J.O. Holloszy, *Improvements in glucose tolerance and insulin action induced by increasing energy expenditure or decreasing energy intake: a randomized controlled trial*. *Am J Clin Nutr*, 2006. **84**(5): p. 1033-42.
877. Weldon, S.M., A.C. Mullen, C.E. Loscher, L.A. Hurley, and H.M. Roche, *Docosahexaenoic acid induces an anti-inflammatory profile in lipopolysaccharide-stimulated human THP-1 macrophages more effectively than eicosapentaenoic acid*. *Journal of Nutritional Biochemistry*, 2007. **18**(4): p. 250-8.
878. Wellinghausen, N., C. Driessen, and L. Rink, *Stimulation of human peripheral blood mononuclear cells by zinc and related cations*. *Cytokine*, 1996. **8**(10): p. 767-71.

879. Wellinghausen, N., A.B. Schromm, U. Seydel, K. Brandenburg, J. Luhm, H. Kirchner, and L. Rink, *Zinc enhances lipopolysaccharide-induced monokine secretion by alteration of fluidity state of lipopolysaccharide*. *Journal of Immunology*, 1996. **157**(7): p. 3139-45.
880. Wessler, S., P. Muenzner, T.F. Meyer, and M. Naumann, *The anti-inflammatory compound curcumin inhibits Neisseria gonorrhoeae-induced NF-kappaB signaling, release of pro-inflammatory cytokines/chemokines and attenuates adhesion in late infection*. *Biological Chemistry*, 2005. **386**(5): p. 481-90.
881. White, J.E., H.Y. Lin, F.B. Davis, P.J. Davis, and M.F. Tsan, *Differential induction of tumor necrosis factor alpha and manganese superoxide dismutase by endotoxin in human monocytes: role of protein tyrosine kinase, mitogen-activated protein kinase, and nuclear factor kappaB*. *Journal of Cellular Physiology*, 2000. **182**(3): p. 381-9.
882. Widlansky, M.E., S.J. Duffy, N.M. Hamburg, N. Gokce, B.A. Warden, S. Wiseman, J.F. Keaney, Jr., B. Frei, and J.A. Vita, *Effects of black tea consumption on plasma catechins and markers of oxidative stress and inflammation in patients with coronary artery disease*. *Free Radical Biology & Medicine*, 2005. **38**(4): p. 499-506.
883. Wieringa, F.T., M.A. Dijkhuizen, C.E. West, J. van der Ven-Jongekrijg, J.W.M. van der Meer, and Muhilal, *Reduced production of immunoregulatory cytokines in vitamin A- and zinc-deficient Indonesian infants*. *European Journal of Clinical Nutrition*, 2004. **58**(11): p. 1498-504.
884. Wigmore, S.J., K.C. Fearon, J.P. Maingay, and J.A. Ross, *Down-regulation of the acute-phase response in patients with pancreatic cancer cachexia receiving oral eicosapentaenoic acid is mediated via suppression of interleukin-6*. *Clinical Science*, 1997. **92**(2): p. 215-21.
885. Wilasrusmee, C., J. Siddiqui, D. Bruch, S. Wilasrusmee, S. Kittur, and D.S. Kittur, *In vitro immunomodulatory effects of herbal products*. *American Surgeon*, 2002. **68**(10): p. 860-4.
886. Williams, M.J., W.H. Sutherland, A.P. Whelan, M.P. McCormick, and S.A. de Jong, *Acute effect of drinking red and white wines on circulating levels of inflammation-sensitive molecules in men with coronary artery disease*. *Metabolism*, 2004. **53**(3): p. 318-23.
887. Williams, M.J.A., W.H.F. Sutherland, M.P. McCormick, D.J. Yeoman, and S.A. de Jong, *Aged garlic extract improves endothelial function in men with coronary artery disease*. *Phytotherapy Research*, 2005. **19**(4): p. 314-9.
888. Wilson, M.R., J.H. Lightbody, K. Donaldson, J. Sales, and V. Stone, *Interactions between ultrafine particles and transition metals in vivo and in vitro*. *Toxicology & Applied Pharmacology*, 2002. **184**(3): p. 172-9.
889. Witkowska, A.M., M.H. Borawska, and M. Gacko, *Relationship among TNF-alpha, sICAM-1, and selenium in presurgical patients with abdominal aortic aneurysms*. *Biological Trace Element Research*, 2006. **114**(1-3): p. 31-40.
890. Woo, H.-M., J.-H. Kang, T. Kawada, H. Yoo, M.-K. Sung, and R. Yu, *Active spice-derived components can inhibit inflammatory responses of adipose tissue in obesity by suppressing inflammatory actions of macrophages and release of monocyte chemoattractant protein-1 from adipocytes*. *Life Sciences*, 2007. **80**(10): p. 926-31.

891. Wood, R.J., J.S. Volek, S.R. Davis, C. Dell'Ova, and M.L. Fernandez, *Effects of a carbohydrate-restricted diet on emerging plasma markers for cardiovascular disease*. Nutr Metab (Lond), 2006. **3**: p. 19.
892. Woollard, K.J., S.J. Rayment, R. Bevan, J.A. Shaw, J. Lunec, and H.R. Griffiths, *Alpha-tocopherol supplementation does not affect monocyte endothelial adhesion or C-reactive protein levels but reduces soluble vascular adhesion molecule-1 in the plasma of healthy subjects*. Redox Report, 2006. **11**(5): p. 214-22.
893. Wu, D., T. Koga, K.R. Martin, and M. Meydani, *Effect of vitamin E on human aortic endothelial cell production of chemokines and adhesion to monocytes*. Atherosclerosis, 1999. **147**(2): p. 297-307.
894. Wu, J.H.Y., N.C. Ward, A.P. Indrawan, C.-A. Almeida, J.M. Hodgson, J.M. Proudfoot, I.B. Puddey, and K.D. Croft, *Effects of alpha-tocopherol and mixed tocopherol supplementation on markers of oxidative stress and inflammation in type 2 diabetes*. Clinical Chemistry, 2007. **53**(3): p. 511-9.
895. Wu, M.-J., L. Wang, H.-Y. Ding, C.-Y. Weng, and J.-H. Yen, *Glossogyne tenuifolia acts to inhibit inflammatory mediator production in a macrophage cell line by downregulating LPS-induced NF-kappa B*. Journal of Biomedical Science, 2004. **11**(2): p. 186-99.
896. Wu, M.-J., C.-Y. Weng, H.-Y. Ding, and P.-J. Wu, *Anti-inflammatory and antiviral effects of Glossogyne tenuifolia*. Life Sciences, 2005. **76**(10): p. 1135-46.
897. Wu, R., X. Cui, W. Dong, M. Zhou, H.H. Simms, and P. Wang, *Suppression of hepatocyte CYP1A2 expression by Kupffer cells via AhR pathway: the central role of proinflammatory cytokines*. International Journal of Molecular Medicine, 2006. **18**(2): p. 339-46.
898. Xagorari, A., A. Papapetropoulos, A. Mauromatis, M. Economou, T. Fotsis, and C. Roussos, *Luteolin inhibits an endotoxin-stimulated phosphorylation cascade and proinflammatory cytokine production in macrophages*. Journal of Pharmacology & Experimental Therapeutics, 2001. **296**(1): p. 181-7.
899. Xagorari, A., C. Roussos, and A. Papapetropoulos, *Inhibition of LPS-stimulated pathways in macrophages by the flavonoid luteolin*. British Journal of Pharmacology, 2002. **136**(7): p. 1058-64.
900. Xi, L., Z. Qian, X. Shen, N. Wen, and Y. Zhang, *Crocetin prevents dexamethasone-induced insulin resistance in rats*. Planta Medica, 2005. **71**(10): p. 917-22.
901. Xi, L., Z. Qian, G. Xu, S. Zheng, S. Sun, N. Wen, L. Sheng, Y. Shi, and Y. Zhang, *Beneficial impact of crocetin, a carotenoid from saffron, on insulin sensitivity in fructose-fed rats*. Journal of Nutritional Biochemistry, 2007. **18**(1): p. 64-72.
902. Xi, L., Z. Qian, G. Xu, C. Zhou, and S. Sun, *Crocetin attenuates palmitate-induced insulin insensitivity and disordered tumor necrosis factor-alpha and adiponectin expression in rat adipocytes*. British Journal of Pharmacology, 2007. **151**(5): p. 610-7.
903. Xia, X., Y. Pan, W.-Y. Zhang, G. Cheng, and L.-D. Kong, *Ethanol extracts from Curcuma longa attenuates behavioral, immune, and neuroendocrine alterations in a rat chronic mild stress model*. Biological & Pharmaceutical Bulletin, 2006. **29**(5): p. 938-44.
904. Xiong, S., H. She, and H. Tsukamoto, *Signaling role of iron in NF-kappa B activation in hepatic macrophages*. Comp Hepatol, 2004. **3 Suppl 1**: p. S36.

905. Yamaki, K. and K. Ohuchi, *Participation of protein kinases in staurosporine-induced interleukin-6 production by rat peritoneal macrophages*. British Journal of Pharmacology, 1999. **127**(6): p. 1309-16.
906. Yamaki, K., Y. Takano-Ishikawa, M. Goto, and K. Shinohara, *Effect of dietary fat on skin reactivity against histamine, Th1 and Th2 cytokine levels and some serum parameters in mice*. Immunobiology, 2005. **209**(10): p. 703-9.
907. Yang, F., W.J. de Villiers, C.J. McClain, and G.W. Varilek, *Green tea polyphenols block endotoxin-induced tumor necrosis factor-production and lethality in a murine model*. Journal of Nutrition, 1998. **128**(12): p. 2334-40.
908. Yang, R., X. Tan, A.M. Thomas, J. Shen, N. Qureshi, D.C. Morrison, and C.W. Van Way, 3rd, *Crocetin inhibits mRNA expression for tumor necrosis factor-alpha, interleukin-1beta, and inducible nitric oxide synthase in hemorrhagic shock*. Jpen: Journal of Parenteral & Enteral Nutrition, 2006. **30**(4): p. 297-301.
909. Yao, Q.-H., D.-Q. Wang, C.-C. Cui, Z.-Y. Yuan, S.-B. Chen, X.-W. Yao, J.-K. Wang, and J.-F. Lian, *Curcumin ameliorates left ventricular function in rabbits with pressure overload: inhibition of the remodeling of the left ventricular collagen network associated with suppression of myocardial tumor necrosis factor-alpha and matrix metalloproteinase-2 expression*. Biological & Pharmaceutical Bulletin, 2004. **27**(2): p. 198-202.
910. Yeh, C.-H., T.-P. Chen, Y.-C. Wu, Y.-M. Lin, and P. Jing Lin, *Inhibition of NFkappaB activation with curcumin attenuates plasma inflammatory cytokines surge and cardiomyocytic apoptosis following cardiac ischemia/reperfusion*. Journal of Surgical Research, 2005. **125**(1): p. 109-16.
911. Yeh, Y.-F. and S.-L. Huang, *Enhancing effect of dietary cholesterol and inhibitory effect of pravastatin on allergic pulmonary inflammation*. Journal of Biomedical Science, 2004. **11**(5): p. 599-606.
912. Yildiz, M.F., S. Kumru, A. Godekmerdan, and S. Kutlu, *Effects of raloxifene, hormone therapy, and soy isoflavone on serum high-sensitive C-reactive protein in postmenopausal women*. International Journal of Gynaecology & Obstetrics, 2005. **90**(2): p. 128-33.
913. Yoneyama, S., K. Miura, S. Sasaki, K. Yoshita, Y. Morikawa, M. Ishizaki, T. Kido, Y. Naruse, and H. Nakagawa, *Dietary intake of fatty acids and serum C-reactive protein in Japanese*. Journal of Epidemiology, 2007. **17**(3): p. 86-92.
914. Yoshida, H., S. Miura, H. Kishikawa, M. Hirokawa, H. Nakamizo, R.C. Nakatsumi, H. Suzuki, H. Saito, and H. Ishii, *Fatty acids enhance GRO/CINC-1 and interleukin-6 production in rat intestinal epithelial cells*. J Nutr, 2001. **131**(11): p. 2943-50.
915. Yun, J., C.K. Lee, I.M. Chang, K. Takatsu, T. Hirano, K.R. Min, M.K. Lee, and Y. Kim, *Differential inhibitory effects of sophoricoside analogs on bioactivity of several cytokines*. Life Sciences, 2000. **67**(23): p. 2855-63.
916. Zeitlin, L., E. Segev, A. Fried, and S. Wientroub, *Effects of long-term administration of N-3 polyunsaturated fatty acids (PUFA) and selective estrogen receptor modulator (SERM) derivatives in ovariectomized (OVX) mice*. Journal of Cellular Biochemistry, 2003. **90**(2): p. 347-60.

917. Zeyda, M., M.D. Saemann, K.M. Stuhlmeier, D.G. Mascher, P.N. Nowotny, G.J. Zlabinger, W. Waldhausl, and T.M. Stulnig, *Polyunsaturated fatty acids block dendritic cell activation and function independently of NF-kappaB activation*. Journal of Biological Chemistry, 2005. **280**(14): p. 14293-301.
918. Zeyda, M., A.B. Szekeres, M.D. Saemann, R. Geyeregger, H. Stockinger, G.J. Zlabinger, W. Waldhausl, and T.M. Stulnig, *Suppression of T cell signaling by polyunsaturated fatty acids: selectivity in inhibition of mitogen-activated protein kinase and nuclear factor activation*. Journal of Immunology, 2003. **170**(12): p. 6033-9.
919. Zhang, M., C.-S. Deng, J.-J. Zheng, and J. Xia, *Curcumin regulated shift from Th1 to Th2 in trinitrobenzene sulphonic acid-induced chronic colitis*. Acta Pharmacologica Sinica, 2006. **27**(8): p. 1071-7.
920. Zhang, X., N. Surguladze, B. Slagle-Webb, A. Cozzi, and J.R. Connor, *Cellular iron status influences the functional relationship between microglia and oligodendrocytes*. GLIA, 2006. **54**(8): p. 795-804.
921. Zhao, G., T.D. Etherton, K.R. Martin, J.P. Vanden Heuvel, P.J. Gillies, S.G. West, and P.M. Kris-Etherton, *Anti-inflammatory effects of polyunsaturated fatty acids in THP-1 cells*. Biochemical & Biophysical Research Communications, 2005. **336**(3): p. 909-17.
922. Zhao, J.-h., Y. Arao, S.-j. Sun, A. Kikuchi, and F. Kayama, *Oral administration of soy-derived genistin suppresses lipopolysaccharide-induced acute liver inflammation but does not induce thymic atrophy in the rat*. Life Sciences, 2006. **78**(8): p. 812-9.
923. Zhao, Y., S. Joshi-Barve, S. Barve, and L.H. Chen, *Eicosapentaenoic acid prevents LPS-induced TNF-alpha expression by preventing NF-kappaB activation*. Journal of the American College of Nutrition, 2004. **23**(1): p. 71-8.
924. Zhong, Z., M. Froh, H.D. Connor, X. Li, L.O. Conzelmann, R.P. Mason, J.J. Lemasters, and R.G. Thurman, *Prevention of hepatic ischemia-reperfusion injury by green tea extract*. American Journal of Physiology - Gastrointestinal & Liver Physiology, 2002. **283**(4): p. G957-64.
925. Zhou, Z., L. Wang, Z. Song, J.T. Saari, C.J. McClain, and Y.J. Kang, *Abrogation of nuclear factor-kappaB activation is involved in zinc inhibition of lipopolysaccharide-induced tumor necrosis factor-alpha production and liver injury*. American Journal of Pathology, 2004. **164**(5): p. 1547-56.
926. Zhou, Z., L. Wang, Z. Song, J.T. Saari, C.J. McClain, and Y.J. Kang, *Zinc supplementation prevents alcoholic liver injury in mice through attenuation of oxidative stress*. American Journal of Pathology, 2005. **166**(6): p. 1681-90.
927. Zhu, Q., M.A. Emanuele, N. LaPaglia, E.J. Kovacs, and N.V. Emanuele, *Vitamin E prevents ethanol-induced inflammatory, hormonal, and cytotoxic changes in reproductive tissues*. Endocrine, 2007. **32**(1): p. 59-68.
928. Zoli, A., L. Altomonte, R. Caricchio, A. Galossi, L. Mirone, M.P. Ruffini, and M. Magaro, *Serum zinc and copper in active rheumatoid arthritis: correlation with interleukin 1 beta and tumour necrosis factor alpha*. Clinical Rheumatology, 1998. **17**(5): p. 378-82.
929. Zunino, S.J., D.H. Storms, and C.B. Stephensen, *Diets rich in polyphenols and vitamin A inhibit the development of type I autoimmune diabetes in nonobese diabetic mice*. Journal of Nutrition, 2007. **137**(5): p. 1216-21.
